# Supplementary material for: Two Genomic Regions Contribute Disproportionately to Geographic Differentiation in Wild Barley
Source: PubMed Central journal article supplement (PMC4455769; doi:10.1534/g3.114.010561), 2014-04-22
Supplement: supp_g3.114.010561_010561SI.pdf [file supp_g3.114.010561_010561SI.pdf]

## **Two genomic regions contribute disproportionately to geographic differentiation in wild barley**

Zhou Fang,<sup>\*,§</sup> Ana M. Gonzales,<sup>\*</sup> Michael T. Clegg,<sup>†</sup> Kevin P. Smith,<sup>\*</sup> Gary J. Muehlbauer,<sup>\*,§</sup> Brian J. Steffenson,<sup>‡</sup> Peter L. Morrell<sup>\*,1</sup>

<sup>\*</sup> Department of Agronomy and Plant Genetics, University of Minnesota, St. Paul, MN 55108

<sup>§</sup> Department of Plant Biology, University of Minnesota, St. Paul, MN 55108

<sup>†</sup> Department of Ecology and Evolutionary Biology, University of California, Irvine, CA 92697

<sup>‡</sup> Department of Plant Pathology, University of Minnesota, St. Paul, MN 55108

<sup>1</sup>*Corresponding author:*

Peter L. Morrell

Department of Agronomy and Plant Genetics, 411 Borlaug Hall, University of Minnesota, Saint Paul, MN 55108

Phone: 612-625-7773

Email: [pmorrell@umn.edu](mailto:pmorrell@umn.edu)

**DOI: 10.1534/g3.114.010561**

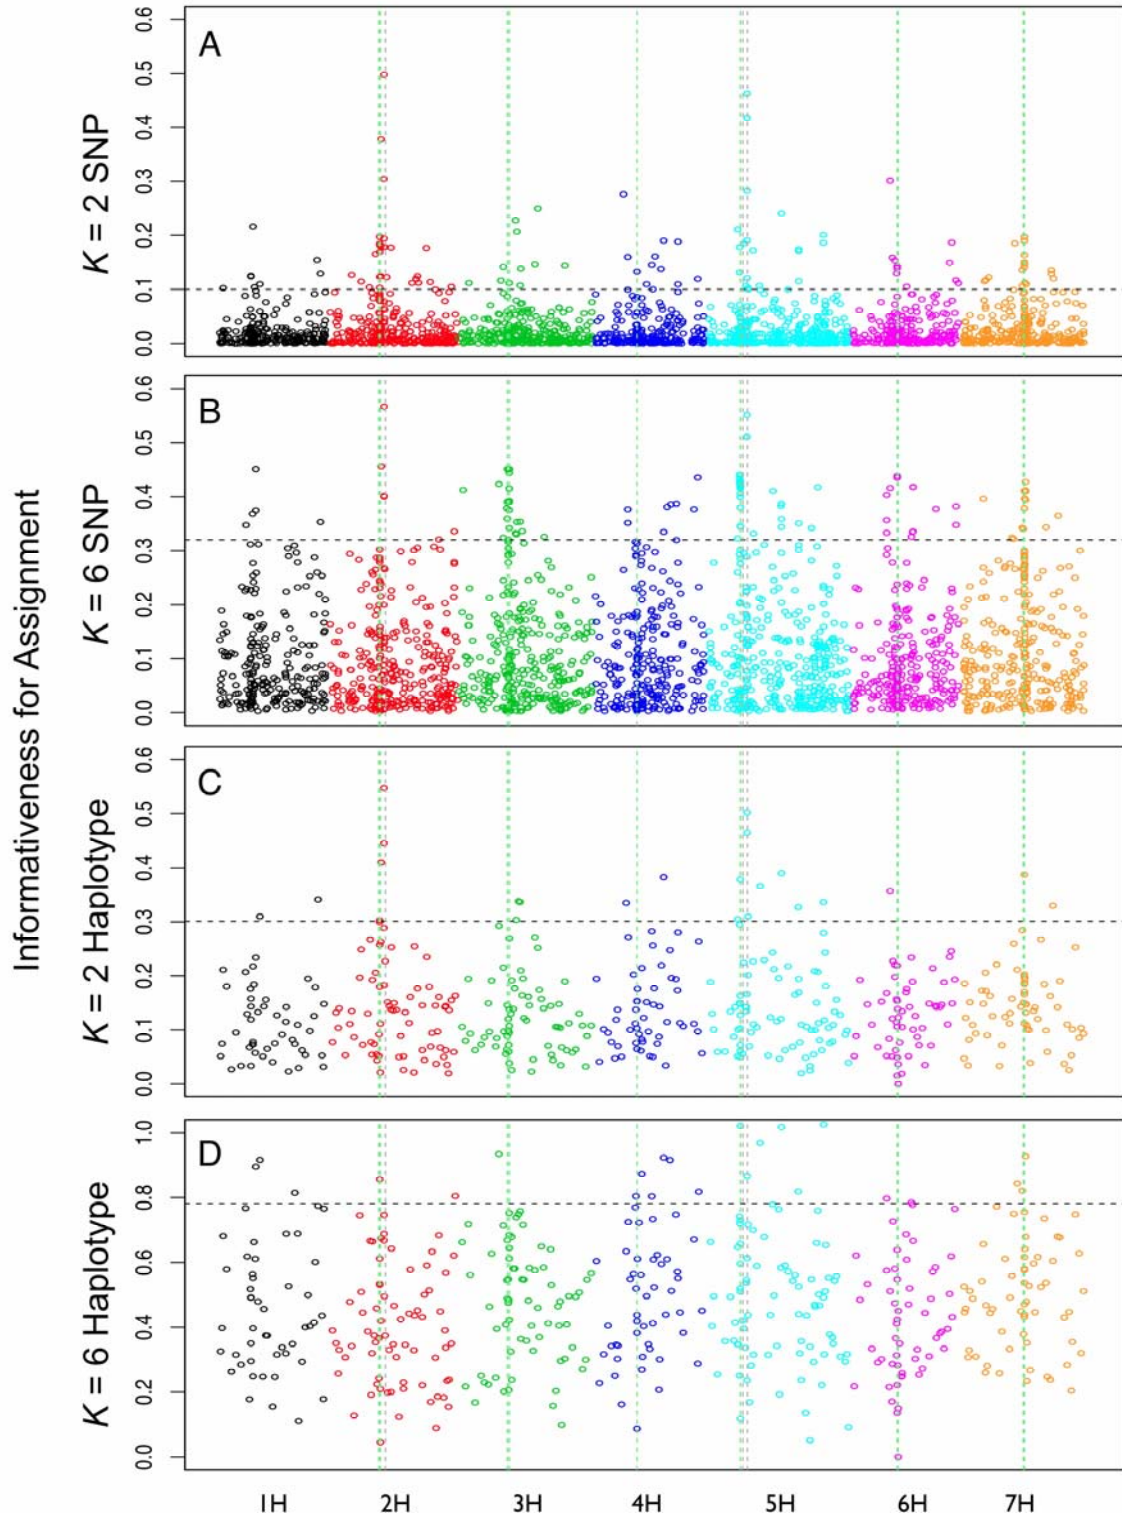

**Figure S1** The informativeness for assignment for all SNPs (A, B) and five-SNP haplotypes (C, D) genome-wide based on (A, C)  $K = 2$  and (B, D)  $K = 6$ . The horizontal dashed line is the 95th percentile. The grey vertical dashed lines delineate the two high  $F_{ST}$  regions based on comparison between the Eastern and Western populations. The green vertical dashed lines indicate the centromeric regions. Note the scale of y-axis in panel D.

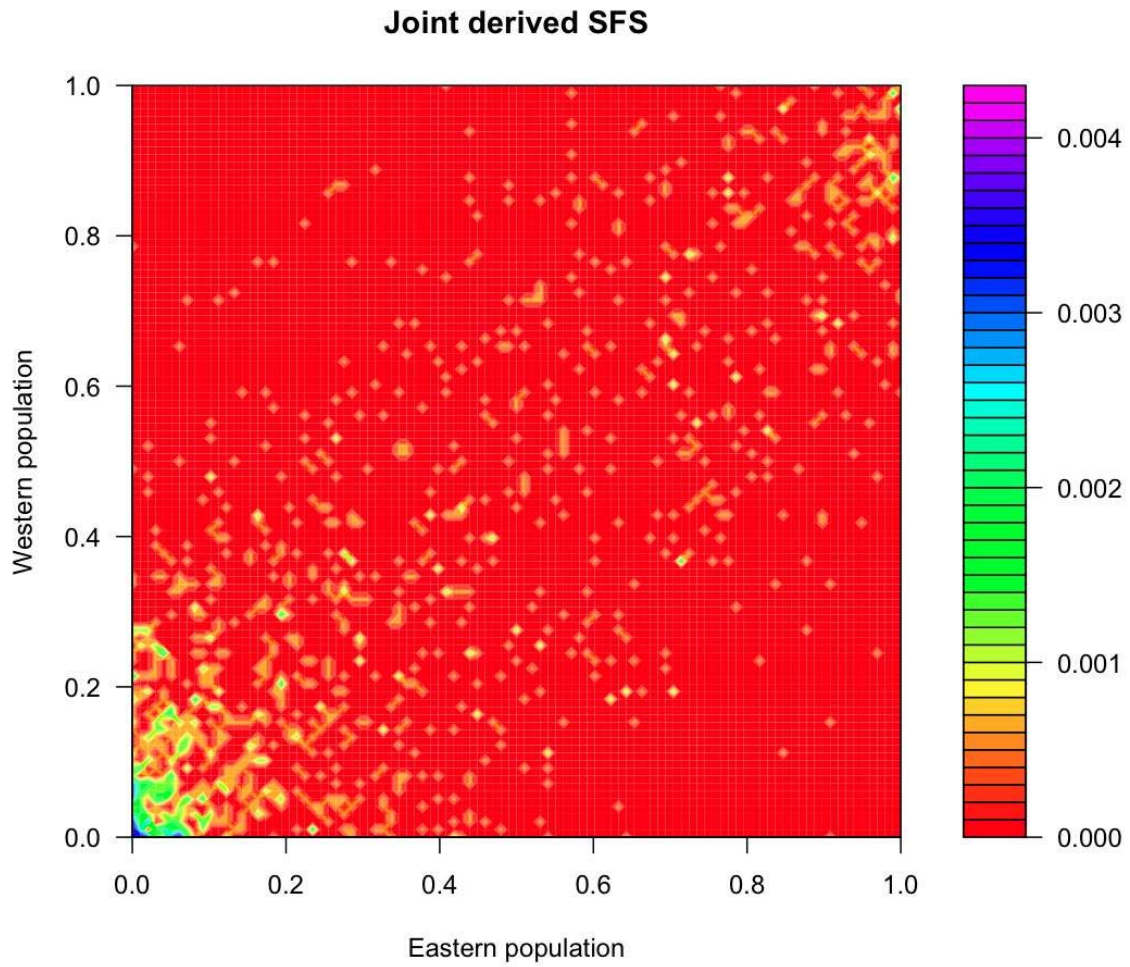

**Figure S2** The joint unfolded site frequency spectrum based on all accessions from the Eastern population (upper triangle) and Western population (lower triangle). The comparison includes 1633 SNPs for which the ancestral state could be inferred by comparison to *Hordeum bulbosum* Illumina RNA-Seq data.

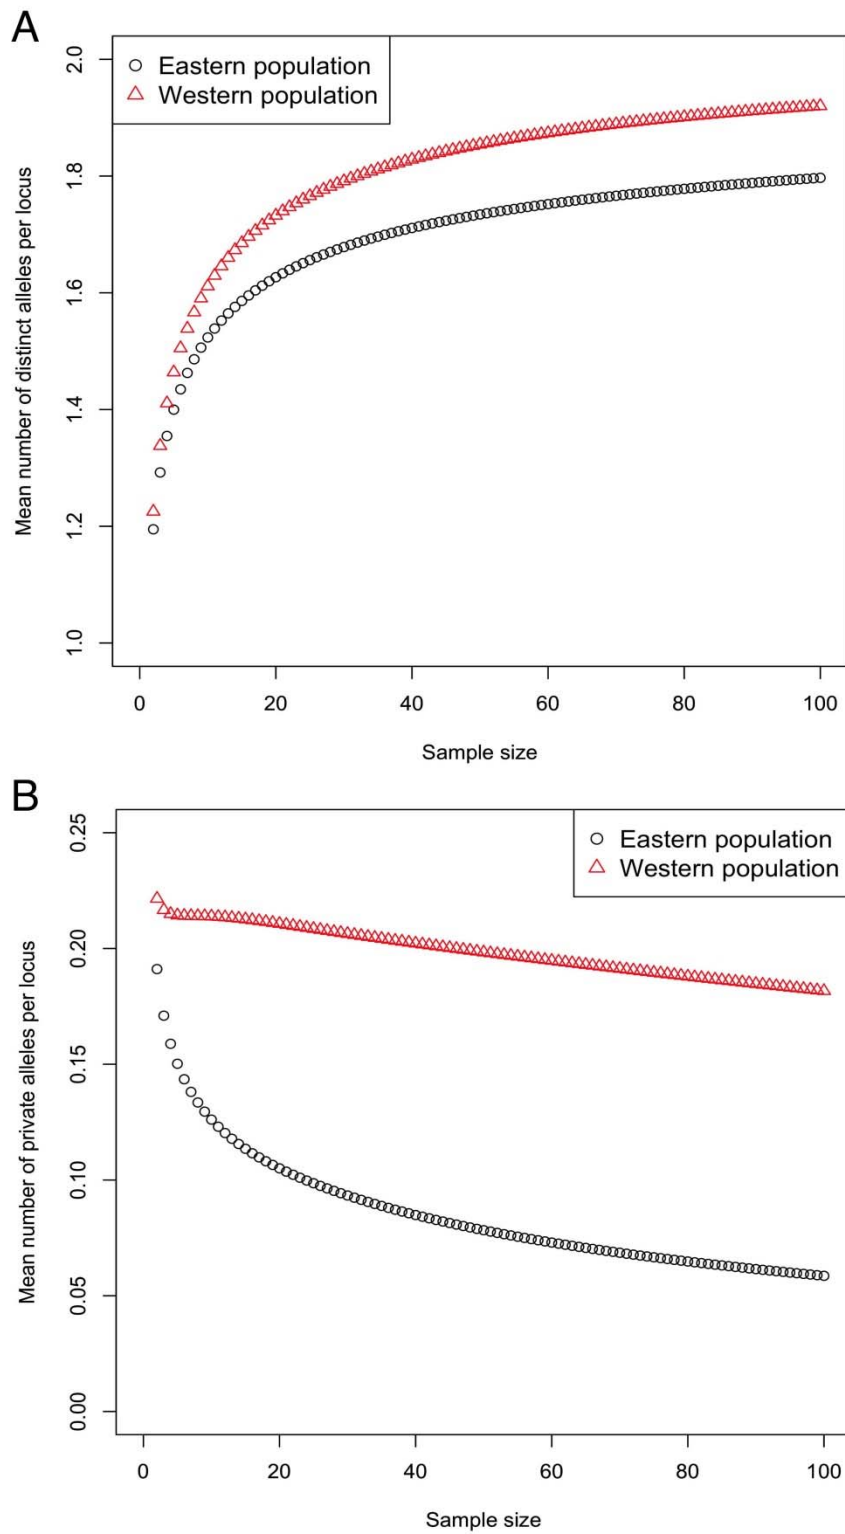

**Figure S3** Rarefaction analysis comparing nucleotide diversity between the Eastern and Western populations, (A) mean number of distinct alleles per locus and (B) mean number of private alleles per locus.

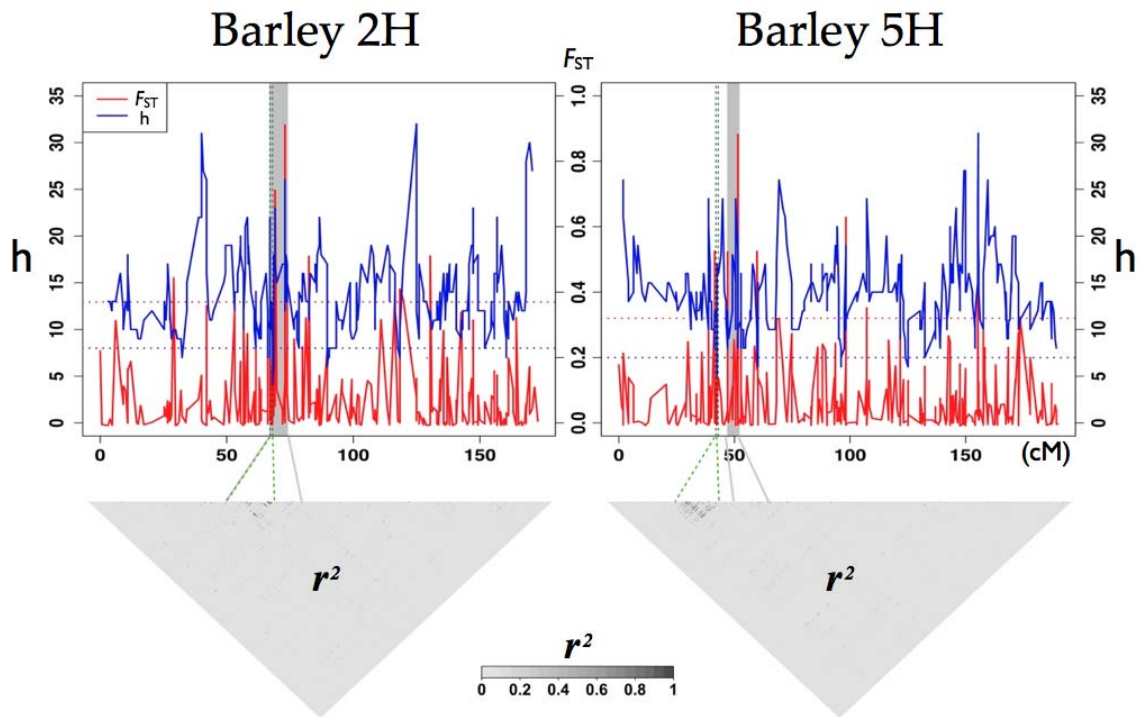

**Figure S4** Population genetic analysis of the two high  $F_{ST}$  regions. Top panel, haplotype number (blue curve) and  $F_{ST}$  between the Eastern and Western populations (red curve). The number of haplotypes present across linkage group 2H and 5H was calculated in overlapping 5-SNP windows with 1-SNP increments. The high  $F_{ST}$  regions are marked in grey and the centromeres by green dashed lines. Below, LD ( $r^2$ ) is plotted across 2H and 5H.

# Environmental Variables

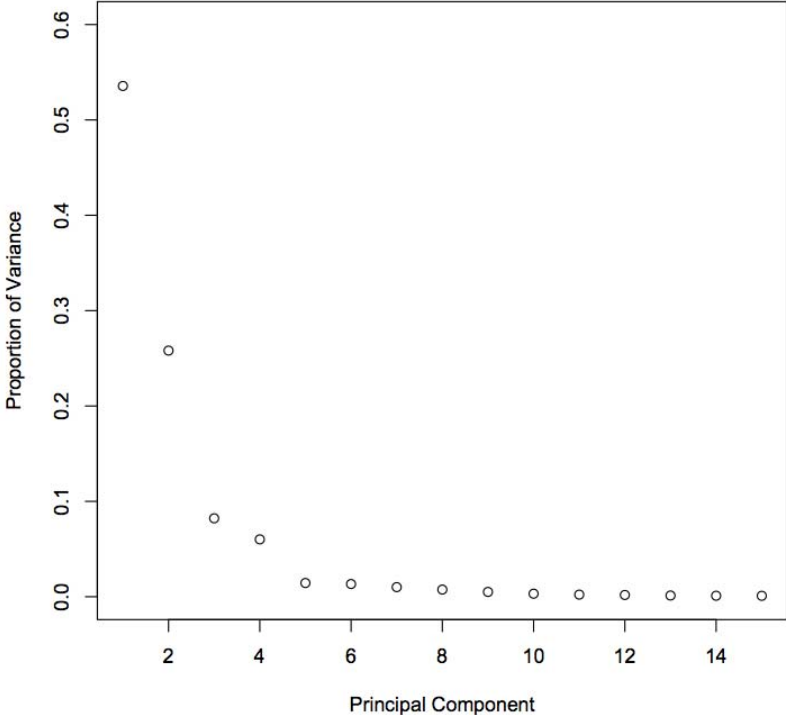

**Figure S5** The proportion of variance explained by each PC of environmental variables.

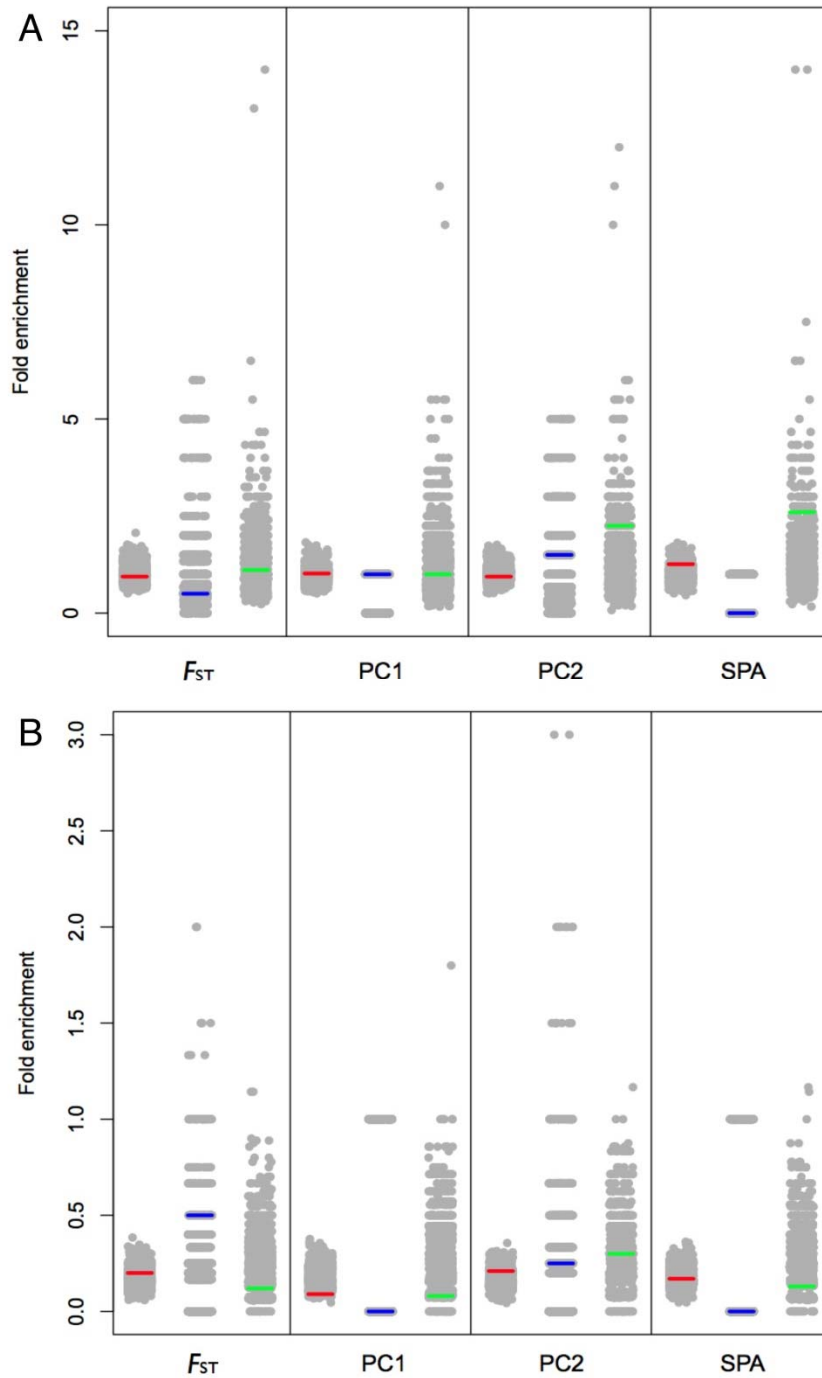

**Figure S6** Enrichment analysis for (A) genic versus non-genic and (B) nonsynonymous versus synonymous SNPs. Enrichment analysis for candidates involved resampling the number of SNPs in each candidate list (outliers in  $F_{ST}$ , environmental association or SPA analyses) randomly from the genome 1000 times. Enrichment analysis was performed for all SNPs genome-wide, centromeric regions, and the two putative translocations or inversions. The observed values from the data is indicated by the colored horizontal line, red: genome-wide; blue: centromeric regions; green: the two putative structural rearrangements.

**Table S1 284 wild barley accessions used in this study, including their latitude and longitude information**

| Accession | Latitude | Longitude |
|-----------|----------|-----------|
| WBDC001   | 36.22    | 36.7      |
| WBDC002   | 35.71    | 37.44     |
| WBDC004   | 35.97    | 36.54     |
| WBDC005   | 32.45    | 35.92     |
| WBDC006   | 32.3     | 36.17     |
| WBDC007   | 32.33    | 35.92     |
| WBDC008   | 32.67    | 35.62     |
| WBDC009   | 31.53    | 35.75     |
| WBDC010   | 36.67    | 65.73     |
| WBDC011   | 36       | 43.52     |
| WBDC012   | 36.28    | 64.82     |
| WBDC013   | 35.53    | 44.83     |
| WBDC014   | 35.75    | 69        |
| WBDC015   | 34.35    | 62.18     |
| WBDC017   | 32.74    | 35.82     |
| WBDC018   | 34.98    | 63.12     |
| WBDC019   | 36.75    | 45.72     |
| WBDC021   | 34.8     | 45.6      |
| WBDC022   | 39.78    | 30.52     |
| WBDC023   | 33.5     | 48.45     |
| WBDC024   | 31.28    | 48.72     |
| WBDC025   | 30.3     | 66.9      |
| WBDC026   | 37.65    | 69.1      |
| WBDC028   | 31.95    | 34.93     |
| WBDC029   | 31.58    | 34.62     |
| WBDC030   | 33.08    | 35.18     |
| WBDC031   | 32.75    | 35.08     |
| WBDC032   | 33       | 35.13     |
| WBDC033   | 31.27    | 35.22     |
| WBDC034   | 31.85    | 34.92     |
| WBDC035   | 31.43    | 34.59     |
| WBDC036   | 34.57    | 63        |
| WBDC037   | 32.98    | 35.5      |
| WBDC038   | 46.77    | 35.21     |
| WBDC039   | 32.03    | 35.83     |
| WBDC040   | 32.7     | 34.95     |
| WBDC041   | 31.67    | 34.57     |
| WBDC042   | 32.97    | 35.53     |
| WBDC043   | 32.98    | 35.58     |
| WBDC044   | 32.17    | 34.83     |
| WBDC046   | 32.48    | 35.9      |
| WBDC047   | 32.53    | 36.07     |
| WBDC048   | 37.25    | 44.48     |
| WBDC049   | 37.25    | 44.48     |
| WBDC051   | 34.76    | 39.03     |
| WBDC052   | 32.32    | 36.02     |



|         |       |       |
|---------|-------|-------|
| WBDC054 | 34.57 | 38.36 |
| WBDC055 | 35.61 | 35.82 |
| WBDC056 | 36.72 | 37.12 |
| WBDC058 | 34.99 | 34.02 |
| WBDC059 | 34.98 | 34.05 |
| WBDC060 | 31.35 | 27.17 |
| WBDC061 | 36.16 | 36.58 |
| WBDC062 | 36.38 | 36.84 |
| WBDC063 | 36.72 | 36.64 |
| WBDC064 | 35.8  | 36.24 |
| WBDC066 | 33.78 | 36.4  |
| WBDC067 | 33.7  | 36.38 |
| WBDC068 | 32.82 | 36.72 |
| WBDC070 | 35.61 | 35.82 |
| WBDC072 | 32.78 | 21.63 |
| WBDC073 | 32.08 | 21.87 |
| WBDC074 | 32.8  | 22.05 |
| WBDC075 | 32.7  | 21.92 |
| WBDC078 | 36.77 | 40.86 |
| WBDC079 | 32.25 | 35.88 |
| WBDC080 | 32.53 | 35.78 |
| WBDC081 | 32.48 | 35.65 |
| WBDC083 | 32.17 | 35.92 |
| WBDC085 | 31.98 | 35.65 |
| WBDC089 | 31.83 | 35.8  |
| WBDC095 | 31.18 | 35.62 |
| WBDC097 | 31.28 | 35.83 |
| WBDC100 | 30.77 | 35.62 |
| WBDC101 | 30.7  | 35.57 |
| WBDC102 | 30.58 | 35.57 |
| WBDC103 | 30.2  | 35.47 |
| WBDC104 | 31.18 | 35.62 |
| WBDC105 | 32.65 | 35.83 |
| WBDC106 | 34.94 | 36.74 |
| WBDC107 | 34.75 | 36.73 |
| WBDC108 | 33.94 | 36.71 |
| WBDC109 | 32.77 | 36.72 |
| WBDC110 | 32.78 | 36.79 |
| WBDC111 | 33.84 | 36.54 |
| WBDC112 | 33.98 | 36.59 |
| WBDC113 | 37.92 | 58.17 |
| WBDC115 | 38.33 | 55.87 |
| WBDC116 | 38.32 | 56.38 |
| WBDC117 | 38.17 | 56.05 |
| WBDC119 | 40.08 | 67.58 |
| WBDC120 | 39.47 | 67.5  |
| WBDC121 | 29.72 | 51.78 |
| WBDC122 | 32.87 | 48.17 |
| WBDC123 | 36.42 | 58.47 |

|         |       |       |
|---------|-------|-------|
| WBDC124 | 35.02 | 46.45 |
| WBDC125 | 38.8  | 66.47 |
| WBDC126 | 33.45 | 35.32 |
| WBDC127 | 32.94 | 36.73 |
| WBDC128 | 33.84 | 36.17 |
| WBDC129 | 32.81 | 36.42 |
| WBDC130 | 32.83 | 36.18 |
| WBDC131 | 33.01 | 36.04 |
| WBDC132 | 33.47 | 35.87 |
| WBDC133 | 33.62 | 35.82 |
| WBDC134 | 33.62 | 35.77 |
| WBDC135 | 33.52 | 35.72 |
| WBDC136 | 33.52 | 35.77 |
| WBDC137 | 33.45 | 35.82 |
| WBDC138 | 33.42 | 35.76 |
| WBDC139 | 33.93 | 36.1  |
| WBDC140 | 34.2  | 36.08 |
| WBDC141 | 34.13 | 36.03 |
| WBDC142 | 34.02 | 36.08 |
| WBDC143 | 33.57 | 35.9  |
| WBDC145 | 33.8  | 36.02 |
| WBDC146 | 36.75 | 45.7  |
| WBDC147 | 37.5  | 45.17 |
| WBDC148 | 37.07 | 45.47 |
| WBDC149 | 38.08 | 45    |
| WBDC150 | 38.5  | 47.2  |
| WBDC151 | 36.52 | 36.95 |
| WBDC152 | 35.5  | 51.25 |
| WBDC155 | 36.33 | 42.17 |
| WBDC156 | 36.42 | 41.65 |
| WBDC157 | 36.38 | 43.42 |
| WBDC158 | 35.37 | 43.2  |
| WBDC159 | 32.68 | 36.79 |
| WBDC160 | 32.96 | 36.6  |
| WBDC161 | 36.65 | 37.58 |
| WBDC164 | 37.01 | 41.64 |
| WBDC165 | 37.29 | 42.21 |
| WBDC167 | 36.4  | 40.36 |
| WBDC168 | 33.57 | 35.72 |
| WBDC169 | 33.5  | 35.78 |
| WBDC170 | 33.63 | 35.95 |
| WBDC171 | 33.58 | 35.85 |
| WBDC174 | 36.27 | 47.77 |
| WBDC175 | 36.27 | 47.77 |
| WBDC177 | 36.35 | 43.13 |
| WBDC178 | 36.08 | 43.28 |
| WBDC179 | 32.5  | 20.9  |
| WBDC180 | 31.83 | 24.23 |
| WBDC181 | 32.02 | 36.02 |

|         |       |       |
|---------|-------|-------|
| WBDC183 | 32.63 | 35.72 |
| WBDC184 | 32.37 | 21.17 |
| WBDC185 | 32.77 | 21.72 |
| WBDC186 | 36.88 | 37.35 |
| WBDC187 | 36.69 | 37.46 |
| WBDC188 | 36.88 | 37.52 |
| WBDC189 | 36.76 | 37.63 |
| WBDC191 | 36.84 | 37.72 |
| WBDC192 | 37.04 | 37.61 |
| WBDC193 | 37.32 | 37.47 |
| WBDC194 | 36.97 | 37.19 |
| WBDC195 | 36.81 | 37.22 |
| WBDC196 | 36.99 | 36.93 |
| WBDC197 | 36.48 | 37.77 |
| WBDC198 | 34.82 | 36.47 |
| WBDC199 | 34.91 | 36.64 |
| WBDC200 | 34.94 | 36.66 |
| WBDC201 | 35.56 | 36.89 |
| WBDC202 | 35.6  | 36.55 |
| WBDC203 | 35.63 | 36.45 |
| WBDC204 | 38.58 | 57.12 |
| WBDC205 | 42.05 | 48.27 |
| WBDC206 | 32.55 | 36.6  |
| WBDC207 | 40.34 | 71.18 |
| WBDC208 | 41.61 | 69.91 |
| WBDC209 | 40.13 | 68.4  |
| WBDC210 | 39.93 | 67.68 |
| WBDC212 | 40.01 | 67.09 |
| WBDC213 | 39.55 | 66.56 |
| WBDC214 | 39.4  | 67.02 |
| WBDC215 | 38.28 | 56.29 |
| WBDC216 | 38.73 | 56.85 |
| WBDC217 | 40.2  | 44.53 |
| WBDC218 | 43.06 | 73.66 |
| WBDC220 | 42.42 | 69.7  |
| WBDC221 | 40.13 | 69.33 |
| WBDC222 | 40.13 | 69.33 |
| WBDC223 | 39.97 | 69    |
| WBDC225 | 40.12 | 69.2  |
| WBDC228 | 40.49 | 49.19 |
| WBDC229 | 40.53 | 48.89 |
| WBDC230 | 40.61 | 48.88 |
| WBDC231 | 40.71 | 48.8  |
| WBDC232 | 40.7  | 48.63 |
| WBDC233 | 35.93 | 68.7  |
| WBDC234 | 35.15 | 33.88 |
| WBDC236 | 31.6  | 35.62 |
| WBDC237 | 31.53 | 35.62 |
| WBDC238 | 31.55 | 35.85 |

|         |       |       |
|---------|-------|-------|
| WBDC240 | 31.88 | 35.94 |
| WBDC241 | 31.78 | 36.22 |
| WBDC242 | 32.12 | 35.87 |
| WBDC243 | 32.03 | 35.67 |
| WBDC244 | 32.08 | 35.71 |
| WBDC245 | 32.17 | 35.87 |
| WBDC246 | 32.68 | 35.75 |
| WBDC247 | 32.37 | 35.7  |
| WBDC248 | 32.53 | 35.85 |
| WBDC250 | 32.58 | 35.93 |
| WBDC252 | 32.28 | 35.68 |
| WBDC253 | 32.35 | 35.82 |
| WBDC254 | 32.62 | 35.7  |
| WBDC255 | 32.35 | 35.67 |
| WBDC256 | 32.33 | 35.63 |
| WBDC257 | 31.18 | 35.7  |
| WBDC258 | 31.28 | 35.75 |
| WBDC260 | 30.5  | 35.5  |
| WBDC261 | 30.52 | 35.53 |
| WBDC262 | 30.3  | 35.48 |
| WBDC263 | 30.38 | 35.47 |
| WBDC265 | 30.93 | 35.67 |
| WBDC266 | 30.88 | 35.67 |
| WBDC268 | 31.75 | 36.76 |
| WBDC269 | 33.42 | 35.87 |
| WBDC270 | 31.68 | 34.87 |
| WBDC271 | 31.43 | 34.48 |
| WBDC274 | 30.87 | 34.77 |
| WBDC275 | 31.58 | 34.55 |
| WBDC277 | 32.15 | 34.93 |
| WBDC278 | 31.83 | 34.77 |
| WBDC279 | 31.82 | 34.78 |
| WBDC280 | 32.02 | 34.83 |
| WBDC281 | 33.03 | 35.58 |
| WBDC282 | 32.68 | 35.22 |
| WBDC284 | 32.67 | 35.6  |
| WBDC285 | 32.98 | 35.45 |
| WBDC286 | 32.97 | 35.47 |
| WBDC287 | 32.5  | 35.5  |
| WBDC288 | 32.98 | 35.42 |
| WBDC289 | 32.52 | 35.48 |
| WBDC290 | 31.67 | 34.93 |
| WBDC291 | 31.72 | 34.92 |
| WBDC292 | 31.8  | 35.02 |
| WBDC293 | 31.8  | 35.17 |
| WBDC294 | 31.75 | 34.98 |
| WBDC295 | 37.08 | 42.07 |
| WBDC296 | 37.06 | 41.56 |
| WBDC297 | 37.06 | 41.75 |

|         |       |       |
|---------|-------|-------|
| WBDC298 | 37.08 | 41.09 |
| WBDC299 | 36.66 | 36.71 |
| WBDC300 | 36.37 | 36.86 |
| WBDC302 | 33.37 | 35.88 |
| WBDC303 | 33.74 | 36.11 |
| WBDC304 | 33.64 | 35.96 |
| WBDC305 | 33.66 | 36    |
| WBDC306 | 33.73 | 36.13 |
| WBDC307 | 33.2  | 36.07 |
| WBDC308 | 32.6  | 36.38 |
| WBDC309 | 35.03 | 37.01 |
| WBDC310 | 34.54 | 36.92 |
| WBDC312 | 34.47 | 36.76 |
| WBDC315 | 34.94 | 36.85 |
| WBDC316 | 36.23 | 36.55 |
| WBDC317 | 35.52 | 38.76 |
| WBDC318 | 32.6  | 36.74 |
| WBDC319 | 32.49 | 36.68 |
| WBDC320 | 32.42 | 36.62 |
| WBDC323 | 37.9  | 58.55 |
| WBDC324 | 35.83 | 61.46 |
| WBDC326 | 37.72 | 58.6  |
| WBDC329 | 38.18 | 55.6  |
| WBDC330 | 38.77 | 56.29 |
| WBDC331 | 39.24 | 56.11 |
| WBDC332 | 38.43 | 56.42 |
| WBDC333 | 38.41 | 56.49 |
| WBDC334 | 38.27 | 56.31 |
| WBDC335 | 39.25 | 55.62 |
| WBDC336 | 38.42 | 56.68 |
| WBDC337 | 37.23 | 37.52 |
| WBDC338 | 37.27 | 37.54 |
| WBDC340 | 37.25 | 37.33 |
| WBDC341 | 36.95 | 36.93 |
| WBDC342 | 36.97 | 36.9  |
| WBDC343 | 36.87 | 36.95 |
| WBDC345 | 38.95 | 66.83 |
| WBDC346 | 39.92 | 66.37 |
| WBDC347 | 37.8  | 67    |
| WBDC348 | 32.44 | 35    |
| WBDC349 | 32.14 | 35.14 |
| WBDC355 | 40.31 | 48.81 |

---

**Table S2 The name, repeat length, repeat unit length, total size and observed heterozygosity of the 29 microsatellites used in this study**

| Microsatellite | # Repeat      | Repeat unit length | Total size (bp) | Observed Heterozygosity |
|----------------|---------------|--------------------|-----------------|-------------------------|
| Bmag905        | 14            | 2                  | 178-228         | 0.01                    |
| Bmag006        | 17            | 2                  | 105-223         | 0.10                    |
| Bmac129        | 28            | 2                  | 132-204         | 0.00                    |
| Bmac67         | 18            | 2                  | 130-262         | 0.04                    |
| Bmag749        | 11            | 2                  | 93-199          | 0.01                    |
| Bmac134        | 28            | 2                  | 117-189         | 0.01                    |
| Bmac156        | (AC)22(AT)5   | 2                  | 103-199         | 0.01                    |
| Bmac213        | 23            | 2                  | 131-213         | 0.09                    |
| Bmac316        | 19            | 2                  | 138-234         | 0.01                    |
| Bmag369        | 16            | 2                  | 196-216         | 0.00                    |
| Bmag718        | (GA)18(AG)6   | 2                  | 165-217         | 0.02                    |
| Bmag877        | 15            | 2                  | 153-289         | 0.04                    |
| EBmac603       | 10            | 2                  | 155-257         | 0.09                    |
| HVM06          | 9             | 2                  | 118-202         | 0.23                    |
| HVMLOH1A       | 6             | 2                  | 147-203         | 0.00                    |
| GMS1           | (CT)7TTT(CT)2 | 2                  | 123-161         | 0.18                    |
| Bmag0496       | 20            | 2                  | 139-287         | 0.03                    |
| HVHVA1         | 5             | 3                  | 134-140         | 0.01                    |
| Bmac18         | 11            | 2                  | 131-145         | 0.00                    |
| Bmag382        | (AG)7AA(AG)7  | 2                  | 103-109         | 0.00                    |
| Scssr02748     | 12            | 2                  | 144-158         | 0.01                    |
| Scssr10148     | 10            | 2                  | 178-230         | 0.04                    |
| Scssr08447     | 6             | 3                  | 172-182         | 0.00                    |
| Scssr05939     | 5             | 2                  | 150-160         | 0.03                    |
| Bmag211        | 16            | 2                  | 150-198         | 0.02                    |
| Hvltppb        | 10            | 2                  | 205-229         | 0.75                    |
| Scssr02306     | 13            | 2                  | 150-164         | 0.00                    |
| Scssr15864     | 4             | 3                  | 146-184         | 0.08                    |
| Scssr25691     | 17            | 2                  | 208-250         | 0.07                    |

**Table S3** Morex state and ancestral state (inferred using *H. Bulbosum* accession Cb2920/4) for all BOPA SNPs.  
Available for download as a .txt file at <http://www.g3journal.org/lookup/suppl/doi:10.1534/g3.114.010561/-/DC1>

**Table S4 (A) Environmental variables and abbreviations used in this study; (B) Environmental variable and the corresponding loadings for the first two principal components**

(A)

| Environmental variable                               | Abbreviation |
|------------------------------------------------------|--------------|
| Annual mean temperature                              | bio1         |
| Mean diurnal range                                   | bio2         |
| Isothermality (bio2/bio7)*100 <sup>a</sup>           | bio3         |
| Temperature seasonality (standard deviation*100)     | bio4         |
| Min temperature of the coldest month                 | bio6         |
| Mean temperature of the wettest quarter              | bio8         |
| Mean temperature of the driest quarter               | bio9         |
| Mean temperature of the coldest quarter              | bio11        |
| Annual precipitation                                 | bio12        |
| Precipitation of the wettest month                   | bio13        |
| Precipitation of the driest month                    | bio14        |
| Precipitation seasonality (coefficient of variation) | bio15        |
| Precipitation of the wettest quarter                 | bio16        |
| Precipitation of the driest quarter                  | bio17        |
| Precipitation of the coldest quarter                 | bio19        |
| Monthly minimum and maximum temperature              | tmin#, tmax# |
| Monthly total precipitation                          | prec#        |

<sup>a</sup> bio7: temperature annual range

(B)

| PC1      |          | PC2      |          |
|----------|----------|----------|----------|
| Variable | Loadings | Variable | Loadings |
| bio11    | -0.223   | bio12    | -0.316   |
| tmin2    | -0.222   | bio16    | -0.314   |
| tmax1    | -0.222   | bio13    | -0.310   |
| tmax2    | -0.221   | prec2    | -0.306   |
| tmax12   | -0.221   | bio19    | -0.303   |
| tmax11   | -0.220   | prec1    | -0.297   |
| bio6     | -0.220   | prec12   | -0.295   |
| tmin1    | -0.220   | prec11   | -0.292   |
| tmin3    | -0.220   | prec3    | -0.286   |
| tmin12   | -0.218   | prec10   | -0.180   |
| tmin11   | -0.215   | prec4    | -0.128   |
| tmin10   | -0.215   | alt      | -0.089   |
| tmax3    | -0.211   | bio15    | -0.058   |



|        |        |        |        |
|--------|--------|--------|--------|
| bio1   | -0.209 | tmin11 | -0.039 |
| tmax10 | -0.201 | tmin12 | -0.038 |
| tmin4  | -0.196 | tmin1  | -0.031 |
| tmax4  | -0.179 | bio6   | -0.030 |
| bio3   | -0.178 | tmin10 | -0.019 |
| bio15  | -0.176 | tmin2  | -0.013 |
| bio9   | -0.116 | bio2   | 0.199  |
| bio8   | -0.111 | tmax4  | 0.147  |
| prec12 | -0.080 | bio8   | 0.091  |
| prec1  | -0.079 | bio4   | 0.088  |
| bio19  | -0.068 | tmax3  | 0.086  |
| prec11 | -0.058 | bio9   | 0.086  |
| bio13  | -0.052 | tmin4  | 0.071  |
| bio16  | -0.048 | tmax10 | 0.068  |
| prec2  | -0.047 | bio1   | 0.065  |
| bio12  | 0.003  | tmax2  | 0.047  |
| prec3  | 0.020  | bio3   | 0.041  |
| bio2   | 0.026  | tmax11 | 0.027  |
| prec10 | 0.091  | tmax1  | 0.023  |
| bio14  | 0.112  | tmax12 | 0.022  |
| bio17  | 0.120  | tmin3  | 0.018  |
| prec4  | 0.141  | bio14  | 0.012  |
| alt    | 0.154  | bio17  | 0.004  |
| bio4   | 0.162  | bio11  | 0.003  |

**Table S5 BOPA SNPs used in this study, including their genetic positions**

| SNP      | Chr | Position |
|----------|-----|----------|
| 11_20001 | 4H  | 31.69    |
| 11_20002 | 3H  | 65.25    |
| 11_20003 | 5H  | 121.67   |
| 11_20005 | 6H  | 132.6    |
| 11_10002 | 1H  | 64.44    |
| 11_10003 | 6H  | 56.06    |
| 11_20008 | 5H  | 141.48   |
| 11_20009 | 3H  | 118.22   |
| 11_10005 | 3H  | 71.26    |
| 11_10006 | 1H  | 76.92    |
| 11_20010 | 5H  | 12.8     |
| 11_10008 | 3H  | 67.86    |
| 11_20012 | 4H  | 43.72    |
| 11_20013 | 4H  | 146.48   |
| 11_20015 | 6H  | 74.65    |
| 11_20014 | 7H  | 11.87    |
| 11_20017 | 3H  | 82.62    |
| 11_20018 | 5H  | 93.66    |
| 11_10010 | 4H  | 77.66    |
| 11_20020 | 4H  | 63.79    |
| 11_10011 | 3H  | 67.86    |
| 11_20021 | 1H  | 111.81   |
| 11_20023 | 3H  | 122.7    |
| 11_20022 | 5H  | 177.9    |
| 11_10012 | 2H  | 67.08    |
| 11_10015 | 6H  | 111.08   |
| 11_10017 | 2H  | 81.31    |
| 11_20029 | 6H  | 133.25   |
| 11_20032 | 2H  | 68.07    |
| 11_10023 | 6H  | 24.91    |
| 11_10024 | 5H  | 96.12    |
| 11_20036 | 6H  | 118.15   |
| 11_20039 | 2H  | 67.63    |
| 11_10025 | 7H  | 14.39    |
| 11_10026 | 3H  | 34.15    |
| 11_20042 | 7H  | 88.06    |
| 11_10028 | 4H  | 56.22    |
| 11_20044 | 4H  | 115.37   |
| 11_10030 | 1H  | 17.4     |
| 11_20052 | 6H  | 44.96    |
| 11_10031 | 4H  | 30.37    |
| 11_20053 | 6H  | 81.79    |
| 11_20058 | 6H  | 65.83    |
| 11_20060 | 7H  | 65.98    |
| 11_20064 | 2H  | 124.98   |
| 11_20063 | 3H  | 97.14    |
| 11_20072 | 4H  | 78.08    |

|          |    |        |
|----------|----|--------|
| 11_10041 | 1H | 138.86 |
| 11_20078 | 5H | 155.66 |
| 11_20080 | 2H | 107.04 |
| 11_10043 | 1H | 63.74  |
| 11_10044 | 3H | 134.71 |
| 11_20085 | 3H | 146.25 |
| 11_20086 | 2H | 110.93 |
| 11_10046 | 4H | 62.81  |
| 11_20089 | 4H | 145.7  |
| 11_10047 | 3H | 90.1   |
| 11_20092 | 7H | 111.15 |
| 11_10048 | 4H | 46.97  |
| 11_20093 | 3H | 93.81  |
| 11_20095 | 1H | 58.59  |
| 11_10050 | 7H | 57.57  |
| 11_20096 | 5H | 70.9   |
| 11_10052 | 4H | 76.31  |
| 11_20097 | 5H | 88.05  |
| 11_20102 | 3H | 65.25  |
| 11_20103 | 7H | 104.32 |
| 11_20104 | 5H | 149.94 |
| 11_20105 | 5H | 49.83  |
| 11_20107 | 2H | 14.42  |
| 11_10055 | 7H | 81.78  |
| 11_20109 | 4H | 29.34  |
| 11_10056 | 7H | 33.49  |
| 11_10057 | 2H | 67.08  |
| 11_10058 | 5H | 42.41  |
| 11_10061 | 6H | 44.96  |
| 11_20113 | 7H | 49.61  |
| 11_20114 | 4H | 44.99  |
| 11_20115 | 3H | 92.73  |
| 11_20117 | 7H | 156.13 |
| 11_20118 | 6H | 106.15 |
| 11_20119 | 4H | 109.65 |
| 11_20121 | 1H | 80.47  |
| 11_20126 | 7H | 31.35  |
| 11_10069 | 7H | 83.42  |
| 11_10070 | 2H | 66.2   |
| 11_20127 | 5H | 116.66 |
| 11_10072 | 2H | 165.28 |
| 11_20129 | 5H | 42.41  |
| 11_20130 | 3H | 108.7  |
| 11_20131 | 2H | 54.27  |
| 11_10075 | 1H | 45.2   |
| 11_20133 | 1H | 132.16 |
| 11_20134 | 5H | 95.11  |
| 11_20135 | 4H | 63.79  |
| 11_10080 | 5H | 143.29 |

|          |    |        |
|----------|----|--------|
| 11_20136 | 3H | 100.29 |
| 11_20138 | 1H | 140.69 |
| 11_20139 | 7H | 141.15 |
| 11_10081 | 3H | 39.92  |
| 11_20145 | 4H | 1.2    |
| 11_20149 | 1H | 98.68  |
| 11_20153 | 1H | 105.77 |
| 11_10090 | 4H | 86.01  |
| 11_20155 | 3H | 162.83 |
| 11_10092 | 2H | 137.03 |
| 11_10093 | 4H | 56.22  |
| 11_10094 | 5H | 114.14 |
| 11_20159 | 3H | 6.31   |
| 11_20160 | 2H | 68.07  |
| 11_10095 | 5H | 132.32 |
| 11_20162 | 7H | 26.14  |
| 11_20168 | 3H | 124.04 |
| 11_20170 | 7H | 162.45 |
| 11_20172 | 3H | 18.21  |
| 11_10101 | 2H | 170.73 |
| 11_10104 | 5H | 141.88 |
| 11_20178 | 4H | 95.22  |
| 11_20179 | 5H | 42.41  |
| 11_20180 | 4H | 44.99  |
| 11_20182 | 2H | 127.74 |
| 11_20184 | 6H | 61.19  |
| 11_10112 | 3H | 14     |
| 11_20189 | 5H | 172.83 |
| 11_20192 | 7H | 29.7   |
| 11_10113 | 4H | 19.45  |
| 11_20193 | 3H | 42.31  |
| 11_20195 | 7H | 67.02  |
| 11_10116 | 5H | 41.45  |
| 11_20197 | 4H | 90.77  |
| 11_20200 | 7H | 81.78  |
| 11_10120 | 6H | 6.54   |
| 11_10121 | 7H | 2.13   |
| 11_10124 | 6H | 74.65  |
| 11_20205 | 7H | 83.42  |
| 11_10128 | 2H | 124.98 |
| 11_10129 | 6H | 44.96  |
| 11_10130 | 7H | 149.31 |
| 11_20210 | 4H | 26.71  |
| 11_10132 | 4H | 26.2   |
| 11_20211 | 6H | 133.9  |
| 11_20212 | 6H | 1.03   |
| 11_20215 | 2H | 147.37 |
| 11_20219 | 0  | 0      |
| 11_20220 | 1H | 111.15 |

|          |    |        |
|----------|----|--------|
| 11_10136 | 6H | 27.33  |
| 11_10137 | 3H | 67.86  |
| 11_10138 | 2H | 108.58 |
| 11_20222 | 3H | 91.79  |
| 11_20226 | 5H | 1.91   |
| 11_20230 | 7H | 88.06  |
| 11_10143 | 7H | 91.12  |
| 11_20232 | 6H | 0      |
| 11_10147 | 2H | 60.89  |
| 11_20236 | 5H | 68.21  |
| 11_10153 | 7H | 79.08  |
| 11_10157 | 5H | 42.41  |
| 11_10158 | 3H | 73.3   |
| 11_10161 | 5H | 155.45 |
| 11_10165 | 6H | 23.62  |
| 11_20245 | 7H | 7.87   |
| 11_10167 | 5H | 71.93  |
| 11_20247 | 7H | 116.28 |
| 11_20249 | 7H | 44.12  |
| 11_10169 | 7H | 106.8  |
| 11_20251 | 2H | 68.56  |
| 11_10172 | 3H | 82.62  |
| 11_10174 | 7H | 162.03 |
| 11_10175 | 6H | 130.38 |
| 11_10177 | 5H | 42.41  |
| 11_10178 | 2H | 40.03  |
| 11_20259 | 5H | 125.09 |
| 11_10180 | 2H | 20.45  |
| 11_20260 | 1H | 42.42  |
| 11_20262 | 6H | 10.72  |
| 11_10182 | 7H | 129.32 |
| 11_10184 | 3H | 110.75 |
| 11_10185 | 6H | 93.44  |
| 11_10186 | 1H | 22.04  |
| 11_20265 | 5H | 53.84  |
| 11_20266 | 6H | 65.29  |
| 11_10189 | 6H | 65.83  |
| 11_10191 | 2H | 72.99  |
| 11_20267 | 1H | 105.77 |
| 11_10194 | 2H | 67.08  |
| 11_20269 | 4H | 54.73  |
| 11_10196 | 2H | 89.68  |
| 11_20273 | 3H | 83.58  |
| 11_10202 | 6H | 102.62 |
| 11_20276 | 3H | 71.26  |
| 11_20283 | 5H | 51.51  |
| 11_10208 | 4H | 2.6    |
| 11_10213 | 2H | 99.39  |
| 11_10214 | 2H | 105.62 |

|          |    |        |
|----------|----|--------|
| 11_20287 | 6H | 73.84  |
| 11_20288 | 3H | 65.25  |
| 11_20289 | 4H | 58.2   |
| 11_10216 | 2H | 26.63  |
| 11_10217 | 5H | 149.94 |
| 11_20291 | 6H | 52.85  |
| 11_20293 | 2H | 161.3  |
| 11_20294 | 6H | 6.54   |
| 11_10223 | 4H | 19.45  |
| 11_10224 | 3H | 67.27  |
| 11_10225 | 3H | 69.4   |
| 11_20298 | 5H | 125.09 |
| 11_20300 | 5H | 122.33 |
| 11_10232 | 7H | 29.05  |
| 11_10234 | 2H | 54.27  |
| 11_20303 | 7H | 0      |
| 11_10236 | 5H | 172.83 |
| 11_20306 | 5H | 50.53  |
| 11_20307 | 7H | 6.79   |
| 11_20309 | 0  | 0      |
| 11_10240 | 5H | 42.41  |
| 11_10243 | 2H | 67.08  |
| 11_20311 | 0  | 0      |
| 11_10244 | 6H | 48.42  |
| 11_20315 | 6H | 27.33  |
| 11_10247 | 4H | 87.01  |
| 11_10251 | 0  | 0      |
| 11_10252 | 5H | 42.41  |
| 11_10253 | 3H | 102.66 |
| 11_10254 | 5H | 169.72 |
| 11_20327 | 5H | 93.22  |
| 11_10256 | 7H | 79.08  |
| 11_10259 | 1H | 40.4   |
| 11_10260 | 5H | 38.78  |
| 11_10261 | 4H | 53.94  |
| 11_10262 | 4H | 63.44  |
| 11_20332 | 5H | 49.16  |
| 11_10265 | 2H | 80.14  |
| 11_20333 | 3H | 67.86  |
| 11_20334 | 5H | 159.97 |
| 11_20336 | 0  | 0      |
| 11_10269 | 4H | 138.7  |
| 11_10275 | 1H | 35.77  |
| 11_10276 | 3H | 86.57  |
| 11_20340 | 2H | 98.74  |
| 11_10279 | 1H | 77.57  |
| 11_20343 | 3H | 136.92 |
| 11_10280 | 3H | 136.92 |
| 11_10281 | 3H | 73.3   |

|          |    |        |
|----------|----|--------|
| 11_10283 | 3H | 180.12 |
| 11_20349 | 7H | 86.84  |
| 11_20347 | 5H | 121.67 |
| 11_10287 | 2H | 98.74  |
| 11_20354 | 7H | 125.16 |
| 11_20355 | 6H | 120.69 |
| 11_20356 | 3H | 50.85  |
| 11_10292 | 5H | 139.63 |
| 11_20358 | 4H | 96.42  |
| 11_10293 | 1H | 48.99  |
| 11_10294 | 1H | 40.4   |
| 11_10299 | 7H | 72.18  |
| 11_20362 | 3H | 90.52  |
| 11_20365 | 7H | 162.24 |
| 11_10303 | 7H | 89.78  |
| 11_20366 | 2H | 145.69 |
| 11_10309 | 4H | 85.07  |
| 11_10310 | 5H | 183.14 |
| 11_10312 | 3H | 125.11 |
| 11_20372 | 5H | 50.53  |
| 11_20373 | 0  | 0      |
| 11_10315 | 2H | 158.18 |
| 11_20375 | 5H | 139    |
| 11_10317 | 2H | 68.56  |
| 11_10318 | 5H | 42.41  |
| 11_10319 | 4H | 11.04  |
| 11_10323 | 6H | 59.25  |
| 11_20379 | 6H | 115.31 |
| 11_20383 | 1H | 134.96 |
| 11_20384 | 4H | 99.36  |
| 11_20385 | 7H | 111.15 |
| 11_10325 | 2H | 56.64  |
| 11_10326 | 2H | 4.72   |
| 11_10329 | 2H | 168.26 |
| 11_20386 | 5H | 24.76  |
| 11_20387 | 2H | 59.58  |
| 11_10331 | 6H | 92.69  |
| 11_10332 | 1H | 11.66  |
| 11_20388 | 5H | 146.55 |
| 11_10334 | 4H | 113.95 |
| 11_10335 | 3H | 77.37  |
| 11_10336 | 5H | 157.61 |
| 11_10338 | 1H | 118.98 |
| 11_20390 | 2H | 72.99  |
| 11_20392 | 5H | 60.21  |
| 11_20394 | 2H | 26.63  |
| 11_10343 | 3H | 179.81 |
| 11_10342 | 2H | 44.82  |
| 11_10352 | 0  | 0      |

|          |    |        |
|----------|----|--------|
| 11_10357 | 1H | 103.99 |
| 11_10360 | 5H | 121.67 |
| 11_10363 | 5H | 147.49 |
| 11_10365 | 3H | 65.25  |
| 11_20409 | 3H | 143.33 |
| 11_20410 | 3H | 39.92  |
| 11_20411 | 4H | 30.37  |
| 11_20412 | 4H | 64.64  |
| 11_10370 | 7H | 81.78  |
| 11_20415 | 6H | 15.81  |
| 11_10373 | 3H | 73.97  |
| 11_20419 | 2H | 85.52  |
| 11_10376 | 2H | 149.27 |
| 11_10379 | 4H | 58.2   |
| 11_20422 | 4H | 28     |
| 11_10380 | 3H | 63.25  |
| 11_10381 | 3H | 143.33 |
| 11_10383 | 2H | 147.37 |
| 11_20427 | 1H | 42.42  |
| 11_20428 | 3H | 67.86  |
| 11_10385 | 5H | 155.23 |
| 11_20432 | 1H | 62.05  |
| 11_10387 | 4H | 130.81 |
| 11_20434 | 1H | 89.77  |
| 11_20438 | 2H | 69.05  |
| 11_20439 | 3H | 67.27  |
| 11_20441 | 5H | 54.77  |
| 11_10390 | 6H | 137.41 |
| 11_10394 | 7H | 81.78  |
| 11_20444 | 3H | 68.51  |
| 11_10396 | 1H | 98.68  |
| 11_20450 | 4H | 64     |
| 11_20449 | 5H | 90.07  |
| 11_20451 | 4H | 79.47  |
| 11_10399 | 2H | 40.03  |
| 11_20452 | 7H | 146.27 |
| 11_10400 | 6H | 100.68 |
| 11_20453 | 4H | 71.71  |
| 11_10401 | 5H | 187.2  |
| 11_20454 | 4H | 111.13 |
| 11_20458 | 2H | 68.07  |
| 11_10404 | 2H | 133.71 |
| 11_10405 | 5H | 172.83 |
| 11_20460 | 7H | 82.2   |
| 11_20461 | 5H | 42.41  |
| 11_10409 | 4H | 3.2    |
| 11_10411 | 4H | 56.22  |
| 11_20467 | 6H | 118.15 |
| 11_10414 | 5H | 93.22  |



|          |    |        |
|----------|----|--------|
| 11_20472 | 4H | 64     |
| 11_20475 | 1H | 93.48  |
| 11_20476 | 2H | 67.08  |
| 11_10419 | 1H | 4.71   |
| 11_20479 | 0  | 0      |
| 11_10422 | 2H | 56.64  |
| 11_20482 | 4H | 69.24  |
| 11_10424 | 4H | 56.22  |
| 11_20487 | 5H | 130.32 |
| 11_20485 | 7H | 91.67  |
| 11_20486 | 3H | 66.62  |
| 11_20488 | 6H | 84.47  |
| 11_10427 | 6H | 37.99  |
| 11_20493 | 6H | 1.03   |
| 11_20494 | 2H | 155.68 |
| 11_10429 | 2H | 130.38 |
| 11_10431 | 7H | 67.02  |
| 11_20495 | 7H | 18.73  |
| 11_10432 | 4H | 54.73  |
| 11_10433 | 1H | 95.14  |
| 11_10434 | 1H | 88.88  |
| 11_20498 | 2H | 116.5  |
| 11_20500 | 2H | 63.55  |
| 11_10436 | 2H | 72.99  |
| 11_10438 | 1H | 42.42  |
| 11_20501 | 5H | 51.51  |
| 11_20502 | 1H | 2.55   |
| 11_20504 | 7H | 158.84 |
| 11_10442 | 7H | 85.28  |
| 11_20507 | 7H | 27.09  |
| 11_20509 | 0  | 0      |
| 11_20511 | 2H | 137.03 |
| 11_10443 | 1H | 143.2  |
| 11_10444 | 3H | 98.05  |
| 11_10446 | 2H | 140.69 |
| 11_20513 | 0  | 0      |
| 11_20514 | 1H | 35.98  |
| 11_20515 | 4H | 112.22 |
| 11_20521 | 3H | 86.03  |
| 11_10451 | 7H | 27.09  |
| 11_20523 | 3H | 125.11 |
| 11_20524 | 5H | 42.41  |
| 11_20526 | 5H | 86.08  |
| 11_20527 | 3H | 142.17 |
| 11_20529 | 3H | 11.01  |
| 11_10454 | 7H | 139.9  |
| 11_10455 | 6H | 73.84  |
| 11_20531 | 6H | 111.08 |
| 11_10456 | 3H | 67.86  |

|          |    |        |
|----------|----|--------|
| 11_20532 | 2H | 72.99  |
| 11_20533 | 5H | 10.08  |
| 11_20534 | 7H | 4.5    |
| 11_20536 | 5H | 168.44 |
| 11_20537 | 6H | 142.2  |
| 11_10460 | 1H | 3.21   |
| 11_10461 | 6H | 52.19  |
| 11_10462 | 6H | 49.17  |
| 11_20545 | 5H | 154.51 |
| 11_20546 | 5H | 163.72 |
| 11_20549 | 5H | 95.11  |
| 11_10471 | 1H | 89.77  |
| 11_20550 | 1H | 90.31  |
| 11_10466 | 1H | 84.71  |
| 11_20551 | 5H | 138.25 |
| 11_20552 | 3H | 26.23  |
| 11_10467 | 4H | 82.81  |
| 11_20553 | 5H | 1.91   |
| 11_20557 | 4H | 20.87  |
| 11_20558 | 6H | 122.14 |
| 11_10469 | 6H | 81.79  |
| 11_20560 | 5H | 156.27 |
| 11_10470 | 1H | 42.42  |
| 11_20561 | 2H | 169.66 |
| 11_20562 | 2H | 10.86  |
| 11_20563 | 2H | 10.07  |
| 11_10475 | 2H | 101.3  |
| 11_20568 | 5H | 143.29 |
| 11_10477 | 5H | 107.19 |
| 11_10480 | 4H | 58.2   |
| 11_20570 | 7H | 112.35 |
| 11_20571 | 5H | 38.78  |
| 11_10481 | 5H | 42.41  |
| 11_20572 | 6H | 59.25  |
| 11_20573 | 5H | 152.93 |
| 11_20577 | 6H | 80.06  |
| 11_20580 | 4H | 79.47  |
| 11_10490 | 4H | 12.34  |
| 11_20582 | 5H | 6.36   |
| 11_20583 | 3H | 66.62  |
| 11_20584 | 0  | 0      |
| 11_20585 | 2H | 72.03  |
| 11_10494 | 6H | 44.96  |
| 11_10496 | 0  | 0      |
| 11_10498 | 2H | 53.09  |
| 11_20590 | 2H | 154.65 |
| 11_20594 | 1H | 139.6  |
| 11_10509 | 4H | 56.22  |
| 11_20595 | 3H | 14.91  |

|          |    |        |
|----------|----|--------|
| 11_10510 | 4H | 112.88 |
| 11_10513 | 6H | 60.65  |
| 11_20600 | 6H | 59.25  |
| 11_10515 | 3H | 110.09 |
| 11_10516 | 1H | 63.14  |
| 11_10518 | 5H | 88.05  |
| 11_20606 | 4H | 28     |
| 11_20607 | 3H | 32.92  |
| 11_10520 | 1H | 45.2   |
| 11_20609 | 0  | 0      |
| 11_20610 | 4H | 61.56  |
| 11_10522 | 1H | 101.34 |
| 11_10523 | 4H | 88.3   |
| 11_10525 | 2H | 38.86  |
| 11_10527 | 4H | 65.28  |
| 11_20612 | 3H | 139.66 |
| 11_10528 | 5H | 155.45 |
| 11_10531 | 7H | 85.28  |
| 11_10534 | 7H | 82.41  |
| 11_20617 | 1H | 27.12  |
| 11_10536 | 5H | 155.23 |
| 11_10538 | 2H | 133.04 |
| 11_10539 | 6H | 50.33  |
| 11_20620 | 6H | 78.52  |
| 11_20623 | 0  | 0      |
| 11_20625 | 1H | 110.08 |
| 11_20626 | 3H | 109.43 |
| 11_20628 | 3H | 108.7  |
| 11_20629 | 5H | 114.82 |
| 11_20631 | 2H | 67.08  |
| 11_10547 | 7H | 160.97 |
| 11_10551 | 2H | 156.77 |
| 11_10552 | 1H | 54.54  |
| 11_20636 | 6H | 77.53  |
| 11_20637 | 5H | 115.76 |
| 11_10557 | 5H | 144.6  |
| 11_10559 | 3H | 26.71  |
| 11_20639 | 3H | 71.26  |
| 11_10578 | 5H | 83.8   |
| 11_10563 | 7H | 112.99 |
| 11_10566 | 2H | 157.26 |
| 11_20642 | 1H | 62.6   |
| 11_10568 | 4H | 62.15  |
| 11_20644 | 5H | 164.15 |
| 11_20645 | 5H | 74.83  |
| 11_20646 | 5H | 157.61 |
| 11_20647 | 3H | 43.96  |
| 11_20650 | 3H | 135.43 |
| 11_10574 | 4H | 21.53  |

|          |    |        |
|----------|----|--------|
| 11_20651 | 6H | 58.48  |
| 11_10576 | 7H | 35.36  |
| 11_20652 | 7H | 111.15 |
| 11_10577 | 4H | 54.73  |
| 11_20653 | 5H | 121.67 |
| 11_20654 | 6H | 95.7   |
| 11_20656 | 6H | 58.48  |
| 11_10580 | 5H | 29.9   |
| 11_10582 | 5H | 155.66 |
| 11_20659 | 3H | 102.12 |
| 11_20660 | 1H | 42.42  |
| 11_10584 | 3H | 127.26 |
| 11_20662 | 3H | 136.92 |
| 11_10586 | 1H | 123.1  |
| 11_20666 | 3H | 48.02  |
| 11_10588 | 4H | 97.52  |
| 11_20668 | 4H | 145.7  |
| 11_20669 | 2H | 68.56  |
| 11_10589 | 5H | 149.94 |
| 11_20670 | 4H | 90.11  |
| 11_20671 | 7H | 64.98  |
| 11_10590 | 1H | 141.46 |
| 11_20673 | 6H | 78.52  |
| 11_20674 | 2H | 55.46  |
| 11_10593 | 5H | 164.36 |
| 11_20676 | 5H | 141.88 |
| 11_20675 | 6H | 53.54  |
| 11_10595 | 6H | 107.49 |
| 11_10597 | 1H | 36.64  |
| 11_20680 | 4H | 28.75  |
| 11_10614 | 4H | 111.81 |
| 11_20681 | 2H | 169.66 |
| 11_20682 | 6H | 84.47  |
| 11_10602 | 2H | 63.55  |
| 11_20686 | 5H | 163.72 |
| 11_20687 | 6H | 139.09 |
| 11_20690 | 2H | 78.54  |
| 11_20691 | 7H | 143.13 |
| 11_10606 | 4H | 78.08  |
| 11_10608 | 6H | 88.25  |
| 11_20694 | 3H | 84.98  |
| 11_20695 | 3H | 87.8   |
| 11_10610 | 4H | 139.97 |
| 11_20697 | 5H | 41.87  |
| 11_10611 | 4H | 135.58 |
| 11_20698 | 1H | 42.42  |
| 11_20700 | 5H | 42.41  |
| 11_20701 | 4H | 133.52 |
| 11_10617 | 1H | 59.29  |

|          |    |        |
|----------|----|--------|
| 11_20704 | 3H | 76.43  |
| 11_20707 | 6H | 49.67  |
| 11_20708 | 5H | 42.41  |
| 11_20709 | 6H | 74.65  |
| 11_10621 | 5H | 31.2   |
| 11_10619 | 2H | 95.58  |
| 11_20712 | 1H | 20.33  |
| 11_10624 | 2H | 67.08  |
| 11_20713 | 5H | 56.77  |
| 11_20714 | 6H | 75.28  |
| 11_10627 | 4H | 79.47  |
| 11_10625 | 2H | 156.77 |
| 11_20715 | 2H | 151.92 |
| 11_20719 | 3H | 52.17  |
| 11_20720 | 6H | 57.18  |
| 11_10630 | 2H | 117.59 |
| 11_10631 | 3H | 153.61 |
| 11_20722 | 7H | 13.7   |
| 11_20723 | 4H | 73.62  |
| 11_20724 | 2H | 14.98  |
| 11_20725 | 6H | 118.15 |
| 11_10632 | 2H | 73.35  |
| 11_10638 | 2H | 57.29  |
| 11_10639 | 4H | 76.09  |
| 11_20730 | 5H | 33.71  |
| 11_10641 | 5H | 59.72  |
| 11_20732 | 4H | 100.23 |
| 11_20733 | 6H | 122.74 |
| 11_20734 | 2H | 86.58  |
| 11_20736 | 5H | 72.68  |
| 11_20737 | 5H | 47.04  |
| 11_10644 | 1H | 128.63 |
| 11_10645 | 6H | 129.73 |
| 11_10646 | 3H | 167.33 |
| 11_20740 | 4H | 82.81  |
| 11_10648 | 2H | 42.78  |
| 11_10651 | 2H | 79.82  |
| 11_20742 | 3H | 20.52  |
| 11_20743 | 6H | 48.42  |
| 11_20744 | 6H | 80.86  |
| 11_10653 | 3H | 69.4   |
| 11_20746 | 6H | 85.94  |
| 11_10654 | 0  | 0      |
| 11_20748 | 2H | 61.49  |
| 11_10658 | 5H | 139    |
| 11_10656 | 2H | 145.69 |
| 11_20750 | 7H | 61.67  |
| 11_10659 | 6H | 59.25  |
| 11_20754 | 1H | 101.99 |

|          |    |        |
|----------|----|--------|
| 11_10661 | 5H | 42.41  |
| 11_20758 | 7H | 28.16  |
| 11_20762 | 4H | 109    |
| 11_10667 | 4H | 54.73  |
| 11_10668 | 4H | 50.22  |
| 11_10669 | 6H | 2.84   |
| 11_20765 | 4H | 95.77  |
| 11_10671 | 5H | 50.53  |
| 11_20766 | 5H | 38.78  |
| 11_20769 | 1H | 92.43  |
| 11_20772 | 1H | 142.55 |
| 11_10673 | 7H | 84.3   |
| 11_10676 | 6H | 32.05  |
| 11_20777 | 4H | 29.76  |
| 11_20778 | 3H | 87.8   |
| 11_20780 | 1H | 108.52 |
| 11_10679 | 2H | 66.2   |
| 11_20782 | 4H | 54.94  |
| 11_20783 | 6H | 100.68 |
| 11_20784 | 6H | 80.06  |
| 11_10681 | 3H | 172.82 |
| 11_10682 | 7H | 0.63   |
| 11_20786 | 5H | 183.14 |
| 11_10685 | 2H | 72.99  |
| 11_10686 | 1H | 77.92  |
| 11_10687 | 7H | 139.9  |
| 11_20790 | 7H | 49.82  |
| 11_10688 | 5H | 28.98  |
| 11_20791 | 5H | 145.9  |
| 11_20792 | 1H | 92.43  |
| 11_20794 | 3H | 28.02  |
| 11_20795 | 5H | 95.52  |
| 11_20796 | 3H | 67.86  |
| 11_20797 | 3H | 5.36   |
| 11_20798 | 1H | 48.99  |
| 11_10692 | 2H | 73.35  |
| 11_20799 | 6H | 59.25  |
| 11_20801 | 3H | 66.62  |
| 11_10694 | 3H | 173.43 |
| 11_10697 | 4H | 135.58 |
| 11_10700 | 7H | 80.3   |
| 11_10702 | 3H | 169.95 |
| 11_20808 | 7H | 102.97 |
| 11_20810 | 1H | 46.5   |
| 11_10705 | 5H | 125.09 |
| 11_20815 | 4H | 85.07  |
| 11_20820 | 4H | 73.03  |
| 11_10707 | 2H | 131.69 |
| 11_20824 | 7H | 109.44 |

|          |    |        |
|----------|----|--------|
| 11_10710 | 3H | 39.57  |
| 11_20829 | 5H | 160.9  |
| 11_20828 | 7H | 81.78  |
| 11_10712 | 4H | 132.78 |
| 11_20835 | 6H | 60.65  |
| 11_20838 | 4H | 107.14 |
| 11_20840 | 1H | 140.69 |
| 11_20841 | 5H | 41.45  |
| 11_20844 | 1H | 111.81 |
| 11_20845 | 5H | 33.55  |
| 11_10722 | 1H | 126.61 |
| 11_10723 | 4H | 93.08  |
| 11_10724 | 4H | 91.42  |
| 11_20885 | 7H | 75.52  |
| 11_20850 | 5H | 90.07  |
| 11_20851 | 3H | 148.79 |
| 11_20853 | 4H | 55.58  |
| 11_20854 | 6H | 59.25  |
| 11_20855 | 1H | 41.74  |
| 11_20856 | 3H | 67.86  |
| 11_10726 | 7H | 51.23  |
| 11_10728 | 3H | 72.21  |
| 11_20862 | 2H | 67.08  |
| 11_10729 | 1H | 116.24 |
| 11_20864 | 2H | 32.35  |
| 11_20866 | 3H | 63.94  |
| 11_20873 | 5H | 21.14  |
| 11_10731 | 2H | 124.98 |
| 11_10733 | 2H | 56.64  |
| 11_10734 | 6H | 109.05 |
| 11_20877 | 3H | 83.8   |
| 11_20879 | 7H | 81.78  |
| 11_10736 | 5H | 171.58 |
| 11_20882 | 6H | 3.46   |
| 11_20884 | 5H | 132.32 |
| 11_20886 | 6H | 1.64   |
| 11_20887 | 2H | 72.99  |
| 11_10741 | 5H | 155.45 |
| 11_20889 | 6H | 86.54  |
| 11_20890 | 3H | 65.25  |
| 11_20891 | 2H | 61.49  |
| 11_20892 | 6H | 79.17  |
| 11_10744 | 1H | 23.62  |
| 11_20893 | 7H | 81.78  |
| 11_20894 | 5H | 1.26   |
| 11_20895 | 2H | 149.27 |
| 11_20896 | 7H | 88.06  |
| 11_20897 | 5H | 177.9  |
| 11_10747 | 3H | 104.15 |

|          |    |        |
|----------|----|--------|
| 11_10748 | 6H | 133.9  |
| 11_10749 | 6H | 59.25  |
| 11_10750 | 0  | 0      |
| 11_10751 | 4H | 97.05  |
| 11_20904 | 6H | 72.17  |
| 11_10753 | 3H | 123.37 |
| 11_10754 | 3H | 134.71 |
| 11_20906 | 4H | 77.87  |
| 11_20908 | 1H | 122.34 |
| 11_20909 | 1H | 105.77 |
| 11_10755 | 5H | 136.94 |
| 11_20911 | 7H | 81.78  |
| 11_20912 | 1H | 46.5   |
| 11_10756 | 4H | 54.73  |
| 11_20915 | 1H | 141.46 |
| 11_10757 | 1H | 22.04  |
| 11_20920 | 3H | 148.79 |
| 11_20921 | 1H | 109.38 |
| 11_10760 | 1H | 28.2   |
| 11_20924 | 4H | 75.44  |
| 11_10764 | 1H | 34.45  |
| 11_20931 | 3H | 81.28  |
| 11_10767 | 3H | 179.16 |
| 11_10768 | 1H | 52.63  |
| 11_10770 | 2H | 167.66 |
| 11_20934 | 5H | 159.55 |
| 11_10771 | 5H | 88.05  |
| 11_20936 | 6H | 46.44  |
| 11_10772 | 7H | 47.1   |
| 11_20939 | 4H | 51.53  |
| 11_10773 | 7H | 81.78  |
| 11_20943 | 2H | 163.19 |
| 11_20944 | 3H | 131.24 |
| 11_20946 | 6H | 59.25  |
| 11_20947 | 2H | 84.96  |
| 11_10778 | 5H | 166.65 |
| 11_20952 | 3H | 156.42 |
| 11_10780 | 2H | 137.03 |
| 11_20956 | 1H | 64.44  |
| 11_10781 | 6H | 72.17  |
| 11_20958 | 5H | 42.41  |
| 11_20959 | 1H | 119.78 |
| 11_10783 | 5H | 130.32 |
| 11_20960 | 2H | 85.73  |
| 11_20961 | 5H | 51.51  |
| 11_20962 | 7H | 152.41 |
| 11_10785 | 4H | 102.93 |
| 11_20968 | 3H | 29.75  |
| 11_10787 | 2H | 31.91  |



|          |    |        |
|----------|----|--------|
| 11_20969 | 6H | 84.47  |
| 11_20970 | 3H | 67.86  |
| 11_20972 | 6H | 106.82 |
| 11_10789 | 1H | 114.06 |
| 11_20974 | 4H | 116.68 |
| 11_20975 | 7H | 62.43  |
| 11_10791 | 2H | 164.35 |
| 11_10793 | 4H | 50.22  |
| 11_20982 | 0  | 0      |
| 11_20980 | 5H | 33.55  |
| 11_20987 | 5H | 38.78  |
| 11_20988 | 5H | 158.28 |
| 11_10796 | 2H | 63.55  |
| 11_10797 | 7H | 135.86 |
| 11_10798 | 1H | 59.29  |
| 11_10799 | 6H | 35.32  |
| 11_20990 | 1H | 80.47  |
| 11_20993 | 7H | 29.7   |
| 11_20996 | 6H | 104.5  |
| 11_20994 | 2H | 160.46 |
| 11_20995 | 3H | 69.95  |
| 11_20998 | 0  | 0      |
| 11_20999 | 3H | 108.7  |
| 11_21000 | 1H | 45.85  |
| 11_21001 | 5H | 63.93  |
| 11_21005 | 2H | 54.92  |
| 11_21008 | 3H | 169.29 |
| 11_10805 | 5H | 122.33 |
| 11_21010 | 4H | 68.19  |
| 11_21012 | 5H | 167.4  |
| 11_21011 | 5H | 42.41  |
| 11_21014 | 6H | 58.48  |
| 11_21015 | 2H | 26     |
| 11_10809 | 4H | 63.79  |
| 11_21018 | 5H | 157.61 |
| 11_21025 | 6H | 102.04 |
| 11_21027 | 3H | 12.38  |
| 11_10814 | 1H | 28.99  |
| 11_10813 | 3H | 83.58  |
| 11_10815 | 6H | 97     |
| 11_21030 | 6H | 44.96  |
| 11_21032 | 6H | 11.68  |
| 11_10817 | 6H | 49.67  |
| 11_21035 | 4H | 134.55 |
| 11_10818 | 2H | 90.48  |
| 11_21038 | 1H | 122.34 |
| 11_21041 | 5H | 154.08 |
| 11_21040 | 5H | 42.41  |
| 11_10819 | 5H | 139    |

|          |    |        |
|----------|----|--------|
| 11_10820 | 5H | 154.08 |
| 11_10821 | 3H | 134.71 |
| 11_21050 | 7H | 15.89  |
| 11_10823 | 2H | 95.58  |
| 11_21053 | 1H | 51.91  |
| 11_10825 | 3H | 39.92  |
| 11_10826 | 2H | 155.68 |
| 11_21061 | 5H | 99.39  |
| 11_21062 | 3H | 67.27  |
| 11_10829 | 4H | 83.75  |
| 11_21067 | 1H | 1.88   |
| 11_21069 | 6H | 71.32  |
| 11_21070 | 4H | 28     |
| 11_21071 | 4H | 54.94  |
| 11_21072 | 1H | 30.81  |
| 11_21073 | 4H | 54.73  |
| 11_10830 | 1H | 89.77  |
| 11_21077 | 5H | 143.29 |
| 11_21079 | 7H | 84.3   |
| 11_21083 | 3H | 111.49 |
| 11_10834 | 5H | 98.2   |
| 11_21087 | 4H | 71.71  |
| 11_21088 | 2H | 145.69 |
| 11_10837 | 2H | 42.01  |
| 11_10838 | 7H | 32.01  |
| 11_21093 | 3H | 59.83  |
| 11_10839 | 3H | 77.37  |
| 11_10840 | 5H | 50.53  |
| 11_10841 | 7H | 9.73   |
| 11_10842 | 3H | 139    |
| 11_21099 | 2H | 168.26 |
| 11_10843 | 7H | 145.6  |
| 11_10846 | 4H | 76.31  |
| 11_21104 | 7H | 134.1  |
| 11_10848 | 6H | 59.25  |
| 11_21109 | 3H | 63.25  |
| 11_21121 | 5H | 58.65  |
| 11_21110 | 2H | 76.61  |
| 11_10851 | 7H | 9.73   |
| 11_21111 | 4H | 113.95 |
| 11_21112 | 6H | 139.75 |
| 11_10853 | 7H | 111.15 |
| 11_10854 | 1H | 119.78 |
| 11_10855 | 5H | 132.32 |
| 11_10856 | 5H | 42.41  |
| 11_21120 | 3H | 75.27  |
| 11_21122 | 4H | 35.24  |
| 11_10861 | 7H | 134.1  |
| 11_10863 | 3H | 42.31  |

|          |    |        |
|----------|----|--------|
| 11_21125 | 2H | 146.72 |
| 11_21126 | 1H | 78.58  |
| 11_21129 | 3H | 63.94  |
| 11_21133 | 5H | 67.66  |
| 11_10867 | 3H | 135.43 |
| 11_21134 | 1H | 37.3   |
| 11_10869 | 5H | 165.28 |
| 11_10870 | 5H | 168.67 |
| 11_21136 | 2H | 101.3  |
| 11_21138 | 5H | 170.25 |
| 11_21140 | 1H | 127.26 |
| 11_21142 | 0  | 0      |
| 11_21141 | 5H | 167.9  |
| 11_21144 | 2H | 78.54  |
| 11_21145 | 3H | 42.96  |
| 11_21147 | 3H | 67.27  |
| 11_21148 | 5H | 50.53  |
| 11_21150 | 5H | 83.17  |
| 11_21153 | 2H | 43.38  |
| 11_21155 | 5H | 182.53 |
| 11_21158 | 6H | 57.83  |
| 11_21161 | 3H | 122.7  |
| 11_21168 | 5H | 98.2   |
| 11_21174 | 1H | 8.96   |
| 11_21175 | 2H | 108.58 |
| 11_10882 | 6H | 44.96  |
| 11_21177 | 5H | 125.09 |
| 11_21181 | 2H | 155.68 |
| 11_21184 | 2H | 124.98 |
| 11_10885 | 7H | 138.83 |
| 11_21187 | 2H | 28.15  |
| 11_21188 | 1H | 42.42  |
| 11_10886 | 3H | 13.78  |
| 11_21189 | 3H | 52.17  |
| 11_21191 | 4H | 70.77  |
| 11_21192 | 1H | 89.77  |
| 11_21193 | 1H | 42.42  |
| 11_21197 | 3H | 63.25  |
| 11_10890 | 1H | 76.92  |
| 11_21200 | 5H | 51.51  |
| 11_10891 | 2H | 29.75  |
| 11_21201 | 7H | 98.95  |
| 11_21202 | 5H | 7.84   |
| 11_21203 | 5H | 121.67 |
| 11_10894 | 7H | 2.13   |
| 11_10896 | 7H | 150.44 |
| 11_21204 | 6H | 8.74   |
| 11_21205 | 2H | 82.98  |
| 11_21207 | 0  | 0      |

|          |    |        |
|----------|----|--------|
| 11_21209 | 7H | 130.64 |
| 11_21210 | 4H | 138.7  |
| 11_10900 | 2H | 114.34 |
| 11_21212 | 3H | 120.73 |
| 11_21215 | 5H | 42.41  |
| 11_21216 | 6H | 59.25  |
| 11_21217 | 1H | 48.29  |
| 11_21220 | 2H | 136.33 |
| 11_10901 | 5H | 152.93 |
| 11_10902 | 5H | 155.45 |
| 11_21223 | 7H | 144.96 |
| 11_21224 | 6H | 86.96  |
| 11_21225 | 6H | 72.17  |
| 11_21226 | 1H | 9.37   |
| 11_10903 | 1H | 133.47 |
| 11_21228 | 4H | 3.8    |
| 11_21229 | 7H | 128.72 |
| 11_21238 | 2H | 125.97 |
| 11_21239 | 5H | 60.21  |
| 11_21241 | 5H | 131.64 |
| 11_10911 | 1H | 121.8  |
| 11_21242 | 2H | 94.25  |
| 11_10913 | 5H | 42.41  |
| 11_10914 | 4H | 65.28  |
| 11_21244 | 5H | 51.51  |
| 11_10916 | 2H | 134.35 |
| 11_10918 | 3H | 132.62 |
| 11_10919 | 2H | 42.01  |
| 11_10920 | 7H | 26.14  |
| 11_21247 | 5H | 125.09 |
| 11_21250 | 2H | 159.62 |
| 11_21251 | 2H | 82.44  |
| 11_21253 | 5H | 36.72  |
| 11_21254 | 4H | 56.22  |
| 11_21256 | 6H | 80.86  |
| 11_10924 | 7H | 80.64  |
| 11_10925 | 3H | 66.62  |
| 11_10926 | 3H | 67.86  |
| 11_21258 | 2H | 80.36  |
| 11_21260 | 5H | 49.16  |
| 11_21261 | 2H | 27.5   |
| 11_21265 | 2H | 27.5   |
| 11_21267 | 3H | 174.45 |
| 11_21271 | 6H | 118.15 |
| 11_10933 | 1H | 45.2   |
| 11_21270 | 7H | 62.64  |
| 11_21272 | 3H | 157.77 |
| 11_21274 | 2H | 154.39 |
| 11_21275 | 5H | 57.89  |

|          |    |        |
|----------|----|--------|
| 11_10939 | 6H | 37.29  |
| 11_21277 | 3H | 124.04 |
| 11_10942 | 4H | 55.15  |
| 11_21280 | 7H | 141.15 |
| 11_21281 | 6H | 47.1   |
| 11_10943 | 2H | 17.24  |
| 11_21286 | 2H | 66.2   |
| 11_10946 | 4H | 59.06  |
| 11_10947 | 2H | 67.08  |
| 11_21289 | 5H | 136.94 |
| 11_21293 | 6H | 72.17  |
| 11_21294 | 3H | 100.29 |
| 11_21296 | 4H | 71.71  |
| 11_21297 | 5H | 145.9  |
| 11_21298 | 6H | 70.5   |
| 11_21299 | 2H | 163.19 |
| 11_21302 | 7H | 81.78  |
| 11_10954 | 6H | 59.25  |
| 11_10956 | 7H | 27.69  |
| 11_21304 | 2H | 34.24  |
| 11_10957 | 1H | 41.74  |
| 11_21305 | 3H | 80.49  |
| 11_21307 | 7H | 1.71   |
| 11_21308 | 5H | 41.45  |
| 11_21309 | 5H | 64.77  |
| 11_21310 | 6H | 65.83  |
| 11_21312 | 1H | 45.2   |
| 11_21314 | 5H | 96.12  |
| 11_21315 | 2H | 138.04 |
| 11_21318 | 5H | 44.23  |
| 11_21321 | 5H | 97.49  |
| 11_10965 | 7H | 24.15  |
| 11_21324 | 5H | 25.42  |
| 11_10966 | 3H | 65.25  |
| 11_21325 | 5H | 123.12 |
| 11_21326 | 7H | 42.26  |
| 11_10971 | 7H | 0      |
| 11_10974 | 5H | 21.68  |
| 11_21333 | 1H | 52.63  |
| 11_10978 | 6H | 106.15 |
| 11_21339 | 6H | 65.29  |
| 11_21340 | 2H | 116.5  |
| 11_21344 | 5H | 53.84  |
| 11_10983 | 7H | 73.54  |
| 11_21346 | 2H | 161.3  |
| 11_21348 | 3H | 98.66  |
| 11_21350 | 5H | 42.41  |
| 11_21353 | 4H | 86.01  |
| 11_10988 | 2H | 124.98 |

|          |    |        |
|----------|----|--------|
| 11_21354 | 1H | 1.68   |
| 11_10989 | 2H | 125.97 |
| 11_21355 | 5H | 149.94 |
| 11_21357 | 1H | 44.59  |
| 11_21358 | 3H | 93.81  |
| 11_21359 | 4H | 20.44  |
| 11_21361 | 1H | 48.99  |
| 11_21363 | 7H | 145.6  |
| 11_21366 | 2H | 27.5   |
| 11_21370 | 2H | 143.18 |
| 11_10994 | 6H | 34.66  |
| 11_10995 | 5H | 42.41  |
| 11_21373 | 1H | 96.95  |
| 11_10996 | 2H | 58.5   |
| 11_10997 | 2H | 62.85  |
| 11_21374 | 4H | 30.37  |
| 11_10999 | 7H | 157.44 |
| 11_21377 | 2H | 9.12   |
| 11_21381 | 3H | 112.15 |
| 11_11002 | 3H | 48.02  |
| 11_21384 | 1H | 138.86 |
| 11_21385 | 4H | 26.2   |
| 11_21390 | 5H | 106.36 |
| 11_21391 | 5H | 33.55  |
| 11_21392 | 1H | 114.06 |
| 11_11004 | 4H | 86.66  |
| 11_21397 | 4H | 35.24  |
| 11_21398 | 3H | 11.01  |
| 11_21399 | 2H | 72.99  |
| 11_21401 | 5H | 40.14  |
| 11_21402 | 3H | 56.54  |
| 11_21405 | 3H | 132.62 |
| 11_21406 | 2H | 142.67 |
| 11_11012 | 7H | 149.31 |
| 11_21409 | 7H | 89.12  |
| 11_21414 | 0  | 0      |
| 11_11014 | 7H | 54.32  |
| 11_11015 | 2H | 60.89  |
| 11_11016 | 3H | 71.26  |
| 11_11019 | 4H | 146.48 |
| 11_21421 | 5H | 91.98  |
| 11_21419 | 7H | 0      |
| 11_21425 | 6H | 133.9  |
| 11_21427 | 3H | 150.11 |
| 11_21428 | 3H | 143.33 |
| 11_21431 | 1H | 62.6   |
| 11_21435 | 3H | 66.62  |
| 11_21436 | 2H | 164.35 |
| 11_21437 | 7H | 11.65  |

|          |    |        |
|----------|----|--------|
| 11_11023 | 2H | 158.6  |
| 11_21438 | 3H | 108.7  |
| 11_21440 | 2H | 140.69 |
| 11_11024 | 5H | 121.67 |
| 11_21443 | 7H | 0.84   |
| 11_21445 | 5H | 74.83  |
| 11_21447 | 5H | 41.45  |
| 11_21448 | 7H | 98.95  |
| 11_11028 | 7H | 65.98  |
| 11_11031 | 7H | 5.96   |
| 11_21452 | 5H | 155.23 |
| 11_21453 | 2H | 168.26 |
| 11_11038 | 1H | 132.16 |
| 11_11042 | 4H | 56.22  |
| 11_11043 | 2H | 125.97 |
| 11_11046 | 2H | 66.2   |
| 11_11048 | 5H | 24.76  |
| 11_21459 | 2H | 143.18 |
| 11_11049 | 1H | 59.29  |
| 11_11054 | 2H | 53.18  |
| 11_11058 | 2H | 102.38 |
| 11_11066 | 4H | 134.55 |
| 11_11067 | 6H | 62.71  |
| 11_11071 | 5H | 136.94 |
| 11_11072 | 2H | 77.76  |
| 11_11075 | 1H | 75.48  |
| 11_21467 | 6H | 128.41 |
| 11_11080 | 5H | 130.98 |
| 11_21469 | 6H | 76.03  |
| 11_11086 | 3H | 64.6   |
| 11_11090 | 5H | 125.09 |
| 11_21472 | 3H | 66.62  |
| 11_11094 | 2H | 119.72 |
| 11_21473 | 6H | 57.18  |
| 11_11098 | 7H | 64.98  |
| 11_11099 | 3H | 67.27  |
| 11_11105 | 1H | 138.86 |
| 11_11111 | 6H | 139.09 |
| 11_11114 | 4H | 59.8   |
| 11_11118 | 2H | 128.87 |
| 11_11122 | 7H | 79.79  |
| 11_11124 | 3H | 67.86  |
| 11_11125 | 3H | 66.62  |
| 11_11128 | 5H | 47.47  |
| 11_11132 | 7H | 0.63   |
| 11_11136 | 4H | 24.71  |
| 11_21481 | 4H | 62.81  |
| 11_11141 | 3H | 137.74 |
| 11_11147 | 6H | 95.7   |

|          |    |        |
|----------|----|--------|
| 11_11153 | 6H | 59.91  |
| 11_11159 | 5H | 52.86  |
| 11_11162 | 1H | 45.2   |
| 11_11178 | 2H | 68.07  |
| 11_11179 | 7H | 4.5    |
| 11_11180 | 4H | 48.77  |
| 11_11185 | 5H | 154.08 |
| 11_11186 | 4H | 144.4  |
| 11_11187 | 6H | 131.64 |
| 11_11191 | 3H | 75.27  |
| 11_11196 | 3H | 138.39 |
| 11_11198 | 5H | 40.14  |
| 11_11199 | 4H | 23.96  |
| 11_11200 | 5H | 109.48 |
| 11_11205 | 6H | 53.54  |
| 11_11206 | 2H | 69.05  |
| 11_11207 | 4H | 72.36  |
| 11_11211 | 2H | 67.08  |
| 11_11213 | 4H | 95.22  |
| 11_11216 | 5H | 162.98 |
| 11_11219 | 7H | 82.2   |
| 11_11221 | 5H | 51.51  |
| 11_11223 | 1H | 1.24   |
| 11_11224 | 4H | 78.5   |
| 11_11227 | 2H | 149.27 |
| 11_11229 | 4H | 78.08  |
| 11_11236 | 2H | 127.74 |
| 11_11239 | 7H | 85.28  |
| 11_11240 | 5H | 51.51  |
| 11_11241 | 3H | 84.22  |
| 11_11243 | 7H | 121.36 |
| 11_11244 | 4H | 61.56  |
| 11_11246 | 6H | 93.44  |
| 11_21491 | 7H | 41.51  |
| 11_11249 | 5H | 60.21  |
| 11_21493 | 3H | 115.21 |
| 11_11256 | 1H | 49.65  |
| 11_11258 | 3H | 63.94  |
| 11_21494 | 7H | 81.78  |
| 11_11260 | 5H | 43.15  |
| 11_11262 | 2H | 156.77 |
| 11_21495 | 3H | 114.36 |
| 11_11273 | 5H | 105.69 |
| 11_11275 | 7H | 151.76 |
| 11_11276 | 0  | 0      |
| 11_11277 | 1H | 100.4  |
| 11_11281 | 5H | 54.77  |
| 11_11283 | 3H | 66.62  |
| 11_11287 | 1H | 43.08  |



|          |    |        |
|----------|----|--------|
| 11_11290 | 5H | 83.17  |
| 11_11292 | 4H | 109.65 |
| 11_11294 | 6H | 105.05 |
| 11_11302 | 2H | 56.64  |
| 11_11307 | 2H | 109.29 |
| 11_11312 | 6H | 59.25  |
| 11_11314 | 3H | 83.16  |
| 11_11323 | 2H | 118.39 |
| 11_11329 | 6H | 78.52  |
| 11_11330 | 3H | 129.83 |
| 11_11332 | 4H | 56.22  |
| 11_11336 | 1H | 42.42  |
| 11_11341 | 5H | 108.28 |
| 11_21502 | 3H | 76.43  |
| 11_11345 | 4H | 5.23   |
| 11_11346 | 2H | 114.34 |
| 11_11348 | 7H | 64.98  |
| 11_11349 | 6H | 80.06  |
| 11_11350 | 5H | 93.66  |
| 11_21504 | 4H | 80.73  |
| 11_11354 | 2H | 68.07  |
| 11_11355 | 5H | 77.75  |
| 11_11361 | 0  | 0      |
| 11_11365 | 2H | 138.04 |
| 11_11367 | 1H | 64.44  |
| 11_11375 | 5H | 123.12 |
| 11_21507 | 0  | 0      |
| 11_11380 | 2H | 160.46 |
| 11_11381 | 5H | 8.25   |
| 11_11384 | 2H | 69.79  |
| 11_21509 | 6H | 64.65  |
| 11_21511 | 3H | 71.26  |
| 11_11391 | 3H | 77.37  |
| 11_11394 | 3H | 81.28  |
| 11_11398 | 4H | 97.05  |
| 11_11400 | 2H | 58.5   |
| 11_21514 | 5H | 147.49 |
| 11_11405 | 4H | 53.28  |
| 11_11406 | 6H | 6.54   |
| 11_11431 | 4H | 76.31  |
| 11_21516 | 7H | 0.21   |
| 11_11432 | 5H | 38.78  |
| 11_11435 | 2H | 89.68  |
| 11_11436 | 3H | 163.49 |
| 11_11440 | 7H | 146.27 |
| 11_11441 | 5H | 143.29 |
| 11_11445 | 7H | 85.28  |
| 11_21521 | 6H | 2.24   |
| 11_11448 | 5H | 131.64 |

|          |    |        |
|----------|----|--------|
| 11_11453 | 3H | 8.56   |
| 11_11456 | 5H | 120.35 |
| 11_11458 | 6H | 88.88  |
| 11_11459 | 6H | 80.86  |
| 11_11461 | 7H | 83.42  |
| 11_11464 | 5H | 158.28 |
| 11_21523 | 3H | 169.95 |
| 11_11469 | 5H | 42.41  |
| 11_11470 | 4H | 111.13 |
| 11_11473 | 5H | 89.37  |
| 11_11478 | 1H | 42.42  |
| 11_11479 | 6H | 15.16  |
| 11_11480 | 2H | 118.39 |
| 11_21528 | 7H | 38.99  |
| 11_11481 | 1H | 128.04 |
| 11_11483 | 6H | 70.5   |
| 11_11488 | 6H | 133.9  |
| 11_11489 | 0  | 0      |
| 11_11490 | 5H | 150.29 |
| 11_11495 | 7H | 6.79   |
| 11_11497 | 5H | 151.35 |
| 11_11500 | 4H | 89.36  |
| 11_11501 | 3H | 67.86  |
| 11_11502 | 3H | 67.86  |
| 11_11503 | 3H | 125.11 |
| 11_11505 | 2H | 51.87  |
| 11_11507 | 5H | 118.16 |
| 11_11509 | 1H | 138.86 |
| 11_11513 | 4H | 80.73  |
| 11_21533 | 3H | 47.37  |
| 11_11516 | 3H | 174.99 |
| 11_11521 | 7H | 127.74 |
| 11_11522 | 2H | 58.15  |
| 11_21536 | 5H | 46.38  |
| 11_11528 | 1H | 122.34 |
| 11_11530 | 3H | 66.62  |
| 11_11533 | 2H | 100.05 |
| 11_11534 | 6H | 122.74 |
| 12_10014 | 3H | 173.43 |
| 12_10016 | 5H | 149.94 |
| 12_10022 | 4H | 95.27  |
| 12_10032 | 0  | 0      |
| 12_10034 | 5H | 51.51  |
| 12_10053 | 4H | 76.31  |
| 12_10063 | 4H | 44.99  |
| 12_10071 | 6H | 130.38 |
| 12_10077 | 5H | 95.11  |
| 12_10088 | 4H | 63.79  |
| 12_10089 | 7H | 91.12  |

|          |    |        |
|----------|----|--------|
| 12_10099 | 2H | 68.07  |
| 12_10100 | 3H | 125.11 |
| 12_10103 | 3H | 3.97   |
| 12_10105 | 0  | 0      |
| 12_10122 | 3H | 143.33 |
| 12_10125 | 7H | 83.42  |
| 12_10149 | 0  | 0      |
| 12_10151 | 0  | 0      |
| 12_10154 | 2H | 69.05  |
| 12_10155 | 3H | 67.86  |
| 12_10159 | 1H | 42.42  |
| 12_10166 | 1H | 71.81  |
| 12_10170 | 4H | 88.7   |
| 12_10171 | 4H | 43.72  |
| 12_10179 | 0  | 0      |
| 12_10181 | 2H | 160.46 |
| 12_10188 | 3H | 137.74 |
| 12_10195 | 4H | 56.22  |
| 12_10198 | 1H | 51.2   |
| 12_10199 | 6H | 49.67  |
| 12_10201 | 1H | 58.59  |
| 12_10203 | 5H | 59.72  |
| 12_10205 | 3H | 141.22 |
| 12_10207 | 1H | 128.04 |
| 12_10210 | 0  | 0      |
| 12_10218 | 7H | 32.13  |
| 12_10219 | 0  | 0      |
| 12_10228 | 5H | 121.67 |
| 12_10230 | 2H | 7.92   |
| 12_10235 | 1H | 40.4   |
| 12_10241 | 7H | 112.99 |
| 12_10257 | 0  | 0      |
| 12_10264 | 5H | 47.04  |
| 12_10267 | 7H | 61.67  |
| 12_10268 | 7H | 81.78  |
| 12_10271 | 4H | 102.93 |
| 12_10273 | 5H | 157.61 |
| 12_10278 | 6H | 60.65  |
| 12_10284 | 0  | 0      |
| 12_10300 | 1H | 42.42  |
| 12_10306 | 0  | 0      |
| 12_10308 | 0  | 0      |
| 12_10313 | 0  | 0      |
| 12_10314 | 1H | 38.36  |
| 12_10322 | 5H | 189.22 |
| 12_10333 | 5H | 147.49 |
| 12_10337 | 0  | 0      |
| 12_10344 | 3H | 114.36 |
| 12_10345 | 6H | 60.65  |

|          |    |        |
|----------|----|--------|
| 12_10347 | 4H | 43.72  |
| 12_10348 | 0  | 0      |
| 12_10362 | 7H | 110.11 |
| 12_10367 | 0  | 0      |
| 12_10368 | 7H | 38.57  |
| 12_10371 | 4H | 44.33  |
| 12_10374 | 0  | 0      |
| 12_10375 | 7H | 4.5    |
| 12_10378 | 7H | 162.03 |
| 12_10392 | 6H | 72.17  |
| 12_10393 | 0  | 0      |
| 12_10395 | 4H | 30.37  |
| 12_10403 | 7H | 55.64  |
| 12_10406 | 7H | 7.33   |
| 12_10408 | 5H | 90.07  |
| 12_10410 | 1H | 4.71   |
| 12_10420 | 1H | 0.54   |
| 12_10426 | 4H | 62.81  |
| 12_10430 | 0  | 0      |
| 12_10452 | 3H | 85.4   |
| 12_10459 | 7H | 81.78  |
| 12_10472 | 2H | 147.37 |
| 12_10474 | 2H | 67.63  |
| 12_10485 | 2H | 63.55  |
| 12_10486 | 2H | 49.5   |
| 12_10487 | 2H | 159.62 |
| 12_10489 | 0  | 0      |
| 12_10491 | 0  | 0      |
| 12_10493 | 0  | 0      |
| 12_10497 | 6H | 56.06  |
| 12_10499 | 5H | 28.98  |
| 12_10502 | 2H | 10.86  |
| 12_10505 | 3H | 137.74 |
| 12_10508 | 5H | 47.04  |
| 12_10535 | 1H | 91.73  |
| 12_10543 | 7H | 121.36 |
| 12_10545 | 2H | 77.76  |
| 12_10554 | 6H | 23.62  |
| 12_10562 | 4H | 26.2   |
| 12_10564 | 0  | 0      |
| 12_10571 | 3H | 18.21  |
| 12_10579 | 2H | 149.93 |
| 12_10581 | 7H | 82.41  |
| 12_10583 | 3H | 102.66 |
| 12_10591 | 6H | 59.25  |
| 12_10596 | 6H | 78.52  |
| 12_10605 | 7H | 58.53  |
| 12_10609 | 3H | 87.8   |
| 12_10613 | 0  | 0      |

|          |    |        |
|----------|----|--------|
| 12_10623 | 0  | 0      |
| 12_10629 | 3H | 172.82 |
| 12_10633 | 5H | 69.29  |
| 12_10634 | 5H | 68.21  |
| 12_10636 | 1H | 5.41   |
| 12_10637 | 4H | 62.81  |
| 12_10640 | 2H | 72.03  |
| 12_10649 | 2H | 108.58 |
| 12_10650 | 2H | 84.96  |
| 12_10652 | 7H | 112.99 |
| 12_10657 | 7H | 61.67  |
| 12_10662 | 3H | 114.36 |
| 12_10666 | 4H | 109.65 |
| 12_10670 | 4H | 94.07  |
| 12_10674 | 5H | 80.18  |
| 12_10677 | 7H | 142.46 |
| 12_10678 | 3H | 71.26  |
| 12_10680 | 3H | 128.01 |
| 12_10689 | 0  | 0      |
| 12_10693 | 1H | 130.42 |
| 12_10698 | 7H | 81.78  |
| 12_10704 | 6H | 117.51 |
| 12_10717 | 2H | 82.98  |
| 12_10718 | 2H | 3.1    |
| 12_10725 | 5H | 52.86  |
| 12_10732 | 5H | 187.2  |
| 12_10735 | 0  | 0      |
| 12_10739 | 2H | 134.29 |
| 12_10746 | 1H | 141.46 |
| 12_10752 | 5H | 103.74 |
| 12_10758 | 6H | 65.83  |
| 12_10766 | 2H | 158.18 |
| 12_10769 | 5H | 163.72 |
| 12_10803 | 6H | 63.71  |
| 12_10808 | 1H | 129.71 |
| 12_10810 | 4H | 37.88  |
| 12_10811 | 6H | 49.67  |
| 12_10824 | 4H | 102.93 |
| 12_10836 | 0  | 0      |
| 12_10844 | 5H | 97.49  |
| 12_10847 | 2H | 34.24  |
| 12_10857 | 5H | 188.7  |
| 12_10859 | 2H | 93.26  |
| 12_10860 | 4H | 37.88  |
| 12_10864 | 5H | 35.39  |
| 12_10878 | 0  | 0      |
| 12_10880 | 0  | 0      |
| 12_10887 | 0  | 0      |
| 12_10888 | 7H | 157.85 |

|          |    |        |
|----------|----|--------|
| 12_10897 | 0  | 0      |
| 12_10899 | 5H | 51.51  |
| 12_10904 | 5H | 147.49 |
| 12_10905 | 1H | 116.16 |
| 12_10915 | 2H | 154.59 |
| 12_10923 | 5H | 40.14  |
| 12_10927 | 2H | 61.49  |
| 12_10930 | 5H | 83.17  |
| 12_10937 | 2H | 166.6  |
| 12_10938 | 1H | 44.59  |
| 12_10948 | 2H | 63.55  |
| 12_10950 | 2H | 159.62 |
| 12_10953 | 5H | 63.93  |
| 12_10959 | 7H | 52.52  |
| 12_10968 | 3H | 38.91  |
| 12_10969 | 2H | 102.38 |
| 12_10970 | 2H | 0      |
| 12_10973 | 7H | 137.31 |
| 12_10979 | 7H | 36.92  |
| 12_10981 | 0  | 0      |
| 12_10982 | 7H | 83.42  |
| 12_11011 | 1H | 6.98   |
| 12_11030 | 2H | 6.09   |
| 12_11035 | 7H | 6.71   |
| 12_11039 | 0  | 0      |
| 12_11044 | 7H | 97.65  |
| 12_11047 | 3H | 150.11 |
| 12_11051 | 7H | 105.73 |
| 12_11055 | 7H | 85.28  |
| 12_11062 | 1H | 64.44  |
| 12_11063 | 4H | 56.22  |
| 12_11069 | 3H | 53.2   |
| 12_11077 | 0  | 0      |
| 12_11078 | 0  | 0      |
| 12_11084 | 3H | 75.27  |
| 12_11091 | 7H | 85.28  |
| 12_11095 | 0  | 0      |
| 12_11096 | 2H | 79.92  |
| 12_11103 | 7H | 70.21  |
| 12_11104 | 6H | 56.06  |
| 12_11106 | 5H | 83.17  |
| 12_11107 | 1H | 47.21  |
| 12_11108 | 4H | 65.28  |
| 12_11119 | 2H | 10.86  |
| 12_11121 | 2H | 76.61  |
| 12_11131 | 2H | 57.29  |
| 12_11137 | 0  | 0      |
| 12_11138 | 3H | 98.05  |
| 12_11139 | 4H | 111.81 |

|          |    |        |
|----------|----|--------|
| 12_11140 | 6H | 59.91  |
| 12_11144 | 1H | 89.77  |
| 12_11146 | 7H | 81.78  |
| 12_11150 | 3H | 75.27  |
| 12_11151 | 5H | 51.51  |
| 12_11154 | 3H | 147.57 |
| 12_11155 | 2H | 66.2   |
| 12_11164 | 0  | 0      |
| 12_11171 | 6H | 53.54  |
| 12_11173 | 1H | 103.99 |
| 12_11175 | 4H | 26.71  |
| 12_11177 | 0  | 0      |
| 12_11181 | 6H | 62.71  |
| 12_11183 | 4H | 111.81 |
| 12_11184 | 7H | 118.44 |
| 12_11190 | 4H | 56.22  |
| 12_11192 | 5H | 186.66 |
| 12_11194 | 4H | 117.61 |
| 12_11208 | 0  | 0      |
| 12_11217 | 1H | 48.29  |
| 12_11235 | 4H | 133.52 |
| 12_11237 | 3H | 29.09  |
| 12_11245 | 5H | 113.51 |
| 12_11253 | 6H | 62.71  |
| 12_11254 | 0  | 0      |
| 12_11255 | 0  | 0      |
| 12_11267 | 1H | 76.22  |
| 12_11269 | 0  | 0      |
| 12_11271 | 1H | 136.7  |
| 12_11274 | 0  | 0      |
| 12_11278 | 2H | 73.89  |
| 12_11279 | 7H | 129.32 |
| 12_11285 | 2H | 108.58 |
| 12_11288 | 2H | 67.08  |
| 12_11295 | 3H | 67.27  |
| 12_11297 | 3H | 156.46 |
| 12_11300 | 4H | 12.34  |
| 12_11301 | 1H | 41.74  |
| 12_11309 | 7H | 151.1  |
| 12_11310 | 3H | 13.13  |
| 12_11311 | 1H | 3.21   |
| 12_11315 | 0  | 0      |
| 12_11316 | 2H | 73.89  |
| 12_11318 | 5H | 34.69  |
| 12_11321 | 6H | 65.83  |
| 12_11322 | 0  | 0      |
| 12_11324 | 2H | 72.99  |
| 12_11325 | 5H | 157.61 |
| 12_11353 | 6H | 56.06  |

|          |    |        |
|----------|----|--------|
| 12_11357 | 1H | 30.15  |
| 12_11368 | 2H | 160.46 |
| 12_11377 | 7H | 84.3   |
| 12_11382 | 4H | 42.22  |
| 12_11383 | 0  | 0      |
| 12_11385 | 5H | 52.86  |
| 12_11386 | 0  | 0      |
| 12_11399 | 5H | 42.41  |
| 12_11408 | 0  | 0      |
| 12_11409 | 1H | 117.24 |
| 12_11413 | 5H | 187.2  |
| 12_11414 | 3H | 34.15  |
| 12_11429 | 3H | 71.26  |
| 12_11433 | 7H | 7.33   |
| 12_11434 | 3H | 6.31   |
| 12_11437 | 7H | 94.34  |
| 12_11443 | 1H | 125.29 |
| 12_11444 | 1H | 54.54  |
| 12_11449 | 2H | 86.58  |
| 12_11450 | 5H | 169.14 |
| 12_11452 | 2H | 33.82  |
| 12_11454 | 3H | 90.1   |
| 12_11455 | 6H | 44.96  |
| 12_11462 | 5H | 42.41  |
| 12_11463 | 1H | 88.88  |
| 12_11466 | 2H | 114.34 |
| 12_11468 | 0  | 0      |
| 12_11472 | 5H | 123.98 |
| 12_11475 | 6H | 70.5   |
| 12_11485 | 4H | 10.77  |
| 12_11487 | 6H | 59.25  |
| 12_11492 | 0  | 0      |
| 12_11494 | 6H | 111.74 |
| 12_11498 | 1H | 34.45  |
| 12_11499 | 7H | 85.28  |
| 12_11510 | 3H | 162.17 |
| 12_11511 | 3H | 61.94  |
| 12_11512 | 5H | 51.51  |
| 12_11517 | 3H | 93.81  |
| 12_11525 | 7H | 61.67  |
| 12_11526 | 4H | 90.1   |
| 12_11529 | 7H | 85.28  |
| 12_11535 | 5H | 121.67 |
| 12_11536 | 7H | 81.78  |
| 12_20006 | 0  | 0      |
| 12_20016 | 7H | 0      |
| 12_20027 | 2H | 155.68 |
| 12_20031 | 7H | 48.06  |
| 12_20045 | 5H | 119.65 |



|          |    |        |
|----------|----|--------|
| 12_20059 | 5H | 45.64  |
| 12_20079 | 7H | 156.13 |
| 12_20090 | 3H | 3.97   |
| 12_20108 | 3H | 69.4   |
| 12_20142 | 6H | 59.25  |
| 12_20143 | 4H | 86.01  |
| 12_20158 | 0  | 0      |
| 12_20183 | 2H | 145.03 |
| 12_20187 | 1H | 105.77 |
| 12_20196 | 2H | 67.08  |
| 12_20201 | 7H | 2.13   |
| 12_20217 | 7H | 120.52 |
| 12_20227 | 7H | 8.45   |
| 12_20234 | 0  | 0      |
| 12_20235 | 2H | 61.49  |
| 12_20237 | 4H | 130.81 |
| 12_20241 | 7H | 142.46 |
| 12_20257 | 0  | 0      |
| 12_20274 | 4H | 6.86   |
| 12_20278 | 5H | 59.72  |
| 12_20285 | 0  | 0      |
| 12_20295 | 0  | 0      |
| 12_20297 | 5H | 63.33  |
| 12_20323 | 0  | 0      |
| 12_20326 | 2H | 42.01  |
| 12_20345 | 3H | 180.12 |
| 12_20350 | 5H | 61.88  |
| 12_20368 | 2H | 30.42  |
| 12_20369 | 3H | 138.39 |
| 12_20381 | 6H | 56.06  |
| 12_20403 | 5H | 94.4   |
| 12_20413 | 3H | 135.43 |
| 12_20416 | 0  | 0      |
| 12_20421 | 3H | 162.17 |
| 12_20424 | 0  | 0      |
| 12_20429 | 1H | 143.2  |
| 12_20436 | 0  | 0      |
| 12_20448 | 6H | 121.44 |
| 12_20489 | 2H | 90.48  |
| 12_20505 | 3H | 162.83 |
| 12_20574 | 3H | 67.86  |
| 12_20591 | 3H | 67.27  |
| 12_20593 | 2H | 29.05  |
| 12_20611 | 7H | 104.32 |
| 12_20613 | 1H | 105.77 |
| 12_20632 | 0  | 0      |
| 12_20640 | 7H | 148.28 |
| 12_20641 | 0  | 0      |
| 12_20649 | 0  | 0      |

|          |    |        |
|----------|----|--------|
| 12_20684 | 7H | 109.99 |
| 12_20685 | 7H | 94.34  |
| 12_20688 | 2H | 55.46  |
| 12_20760 | 4H | 138.7  |
| 12_20770 | 5H | 35.88  |
| 12_20775 | 0  | 0      |
| 12_20793 | 2H | 103.13 |
| 12_20818 | 5H | 64.79  |
| 12_20825 | 0  | 0      |
| 12_20830 | 5H | 142.54 |
| 12_20831 | 4H | 56.22  |
| 12_20849 | 3H | 92.73  |
| 12_20863 | 3H | 73.3   |
| 12_20867 | 5H | 167.4  |
| 12_20917 | 2H | 61.49  |
| 12_20949 | 7H | 142.46 |
| 12_20954 | 0  | 0      |
| 12_20981 | 5H | 51.51  |
| 12_20985 | 0  | 0      |
| 12_20989 | 2H | 130.38 |
| 12_21003 | 0  | 0      |
| 12_21009 | 5H | 168.44 |
| 12_21019 | 0  | 0      |
| 12_21036 | 5H | 57.04  |
| 12_21049 | 2H | 31.17  |
| 12_21114 | 6H | 60.65  |
| 12_21115 | 0  | 0      |
| 12_21117 | 4H | 0      |
| 12_21131 | 1H | 59.99  |
| 12_21137 | 4H | 57.54  |
| 12_21157 | 0  | 0      |
| 12_21167 | 7H | 75.52  |
| 12_21172 | 1H | 121.56 |
| 12_21186 | 5H | 74.83  |
| 12_21208 | 7H | 116.28 |
| 12_21234 | 7H | 68.89  |
| 12_21290 | 5H | 167.4  |
| 12_21319 | 7H | 82.41  |
| 12_21328 | 7H | 151.76 |
| 12_21337 | 2H | 67.08  |
| 12_21372 | 5H | 39.48  |
| 12_21376 | 3H | 159.54 |
| 12_21386 | 3H | 154.44 |
| 12_21393 | 5H | 177.9  |
| 12_21415 | 2H | 3.84   |
| 12_21442 | 4H | 56.22  |
| 12_21462 | 5H | 143.29 |
| 12_21463 | 1H | 57.27  |
| 12_21471 | 5H | 125.09 |

|          |    |        |
|----------|----|--------|
| 12_21475 | 3H | 67.86  |
| 12_21476 | 2H | 74.55  |
| 12_21477 | 6H | 125.99 |
| 12_21479 | 0  | 0      |
| 12_21482 | 6H | 59.25  |
| 12_21492 | 7H | 72.18  |
| 12_21497 | 5H | 83.17  |
| 12_21500 | 3H | 178.25 |
| 12_21522 | 0  | 0      |
| 12_21527 | 2H | 114.34 |
| 12_21531 | 3H | 158.05 |
| 12_30001 | 5H | 4.15   |
| 12_30002 | 0  | 0      |
| 12_30003 | 0  | 0      |
| 12_30004 | 7H | 81.78  |
| 12_30005 | 3H | 77.37  |
| 12_30007 | 5H | 60.21  |
| 12_30010 | 6H | 18.89  |
| 12_30011 | 5H | 52.86  |
| 12_30021 | 6H | 58.48  |
| 12_30025 | 6H | 127.01 |
| 12_30026 | 7H | 94.34  |
| 12_30032 | 6H | 56.06  |
| 12_30039 | 3H | 67.27  |
| 12_30040 | 7H | 26.14  |
| 12_30046 | 4H | 105.83 |
| 12_30048 | 1H | 143.2  |
| 12_30049 | 2H | 118.39 |
| 12_30053 | 7H | 81.78  |
| 12_30055 | 3H | 178.99 |
| 12_30056 | 5H | 107.19 |
| 12_30057 | 6H | 131.64 |
| 12_30060 | 4H | 62.81  |
| 12_30062 | 5H | 147.49 |
| 12_30063 | 7H | 26.14  |
| 12_30064 | 3H | 50.19  |
| 12_30065 | 7H | 36.26  |
| 12_30067 | 5H | 123.78 |
| 12_30068 | 2H | 67.08  |
| 12_30072 | 1H | 87.43  |
| 12_30080 | 5H | 60.21  |
| 12_30081 | 3H | 136.92 |
| 12_30083 | 7H | 29.7   |
| 12_30084 | 3H | 134.71 |
| 12_30090 | 3H | 108    |
| 12_30092 | 3H | 143.33 |
| 12_30095 | 2H | 117.17 |
| 12_30096 | 3H | 135.43 |
| 12_30097 | 2H | 139.29 |

|          |    |        |
|----------|----|--------|
| 12_30098 | 5H | 94.4   |
| 12_30102 | 2H | 172.92 |
| 12_30108 | 2H | 72.99  |
| 12_30109 | 5H | 42.41  |
| 12_30110 | 1H | 45.2   |
| 12_30111 | 5H | 51.51  |
| 12_30113 | 3H | 17.66  |
| 12_30115 | 0  | 0      |
| 12_30116 | 0  | 0      |
| 12_30119 | 3H | 116.24 |
| 12_30120 | 6H | 56.06  |
| 12_30125 | 7H | 67.56  |
| 12_30126 | 3H | 67.86  |
| 12_30129 | 0  | 0      |
| 12_30130 | 3H | 67.27  |
| 12_30133 | 6H | 52.19  |
| 12_30135 | 3H | 179.81 |
| 12_30137 | 3H | 151.84 |
| 12_30138 | 4H | 98.7   |
| 12_30140 | 4H | 5.54   |
| 12_30141 | 7H | 29.05  |
| 12_30142 | 4H | 100.97 |
| 12_30143 | 7H | 38.57  |
| 12_30144 | 6H | 61.19  |
| 12_30148 | 6H | 89.58  |
| 12_30149 | 7H | 57.57  |
| 12_30150 | 4H | 16.96  |
| 12_30151 | 6H | 111.08 |
| 12_30153 | 0  | 0      |
| 12_30155 | 2H | 10.86  |
| 12_30158 | 4H | 109.65 |
| 12_30162 | 5H | 157.61 |
| 12_30163 | 5H | 0      |
| 12_30164 | 7H | 118.44 |
| 12_30165 | 5H | 155.45 |
| 12_30166 | 0  | 0      |
| 12_30167 | 5H | 20.48  |
| 12_30168 | 7H | 104.32 |
| 12_30169 | 5H | 121.67 |
| 12_30170 | 3H | 92.73  |
| 12_30178 | 2H | 87.25  |
| 12_30181 | 7H | 51.23  |
| 12_30183 | 5H | 147.49 |
| 12_30186 | 0  | 0      |
| 12_30197 | 0  | 0      |
| 12_30199 | 7H | 88.06  |
| 12_30200 | 2H | 113.53 |
| 12_30203 | 0  | 0      |
| 12_30204 | 1H | 89.77  |

|          |    |        |
|----------|----|--------|
| 12_30205 | 2H | 82.44  |
| 12_30206 | 2H | 67.08  |
| 12_30213 | 7H | 83.42  |
| 12_30214 | 5H | 44.89  |
| 12_30216 | 2H | 107.92 |
| 12_30219 | 7H | 29.05  |
| 12_30221 | 0  | 0      |
| 12_30222 | 0  | 0      |
| 12_30223 | 3H | 129.83 |
| 12_30224 | 0  | 0      |
| 12_30226 | 4H | 89.36  |
| 12_30230 | 6H | 59.25  |
| 12_30231 | 1H | 141.46 |
| 12_30232 | 4H | 100.97 |
| 12_30236 | 6H | 83.28  |
| 12_30237 | 4H | 70.77  |
| 12_30239 | 4H | 143.35 |
| 12_30242 | 7H | 30.69  |
| 12_30243 | 1H | 48.99  |
| 12_30244 | 7H | 153.91 |
| 12_30250 | 3H | 106.67 |
| 12_30251 | 2H | 61.49  |
| 12_30259 | 2H | 56.64  |
| 12_30260 | 0  | 0      |
| 12_30268 | 1H | 36.64  |
| 12_30271 | 3H | 169.95 |
| 12_30274 | 3H | 133.36 |
| 12_30275 | 2H | 72.99  |
| 12_30276 | 3H | 125.11 |
| 12_30278 | 3H | 95.14  |
| 12_30283 | 0  | 0      |
| 12_30284 | 3H | 29.75  |
| 12_30285 | 0  | 0      |
| 12_30295 | 1H | 69.08  |
| 12_30298 | 1H | 73.13  |
| 12_30304 | 1H | 59.29  |
| 12_30305 | 6H | 59.91  |
| 12_30306 | 0  | 0      |
| 12_30310 | 2H | 140.69 |
| 12_30314 | 5H | 74.83  |
| 12_30316 | 6H | 52.19  |
| 12_30318 | 3H | 67.86  |
| 12_30319 | 6H | 0      |
| 12_30323 | 2H | 72.99  |
| 12_30325 | 3H | 101.37 |
| 12_30329 | 7H | 22.84  |
| 12_30331 | 4H | 53.94  |
| 12_30335 | 7H | 102.97 |
| 12_30336 | 1H | 35.11  |

|          |    |        |
|----------|----|--------|
| 12_30337 | 5H | 42.41  |
| 12_30342 | 3H | 114.36 |
| 12_30343 | 1H | 51.91  |
| 12_30344 | 7H | 77.02  |
| 12_30346 | 6H | 65.83  |
| 12_30348 | 1H | 51.2   |
| 12_30350 | 1H | 45.2   |
| 12_30351 | 0  | 0      |
| 12_30352 | 2H | 156.77 |
| 12_30354 | 5H | 41.45  |
| 12_30358 | 6H | 38.66  |
| 12_30360 | 5H | 187.2  |
| 12_30362 | 7H | 114.96 |
| 12_30367 | 3H | 149.45 |
| 12_30368 | 7H | 118.52 |
| 12_30370 | 3H | 164.15 |
| 12_30371 | 7H | 47.1   |
| 12_30375 | 3H | 125.11 |
| 12_30377 | 5H | 121.01 |
| 12_30378 | 2H | 171.6  |
| 12_30379 | 2H | 48.8   |
| 12_30382 | 5H | 188.04 |
| 12_30385 | 4H | 118.31 |
| 12_30388 | 0  | 0      |
| 12_30389 | 7H | 81.78  |
| 12_30390 | 4H | 93.08  |
| 12_30394 | 4H | 26.2   |
| 12_30396 | 2H | 151.92 |
| 12_30399 | 3H | 86.57  |
| 12_30400 | 5H | 143.94 |
| 12_30402 | 2H | 10.86  |
| 12_30403 | 1H | 128.04 |
| 12_30404 | 1H | 42.42  |
| 12_30406 | 1H | 45.2   |
| 12_30408 | 5H | 42.41  |
| 12_30409 | 0  | 0      |
| 12_30410 | 5H | 31.2   |
| 12_30411 | 7H | 81.78  |
| 12_30414 | 6H | 137.41 |
| 12_30420 | 2H | 40.69  |
| 12_30423 | 3H | 120.73 |
| 12_30424 | 0  | 0      |
| 12_30425 | 4H | 139.97 |
| 12_30427 | 4H | 59.8   |
| 12_30430 | 6H | 56.06  |
| 12_30431 | 3H | 35.95  |
| 12_30432 | 2H | 44.04  |
| 12_30438 | 1H | 42.42  |
| 12_30441 | 6H | 58.48  |

|          |    |        |
|----------|----|--------|
| 12_30444 | 0  | 0      |
| 12_30445 | 7H | 81.78  |
| 12_30449 | 7H | 81.78  |
| 12_30450 | 4H | 56.88  |
| 12_30454 | 5H | 41.45  |
| 12_30455 | 4H | 77     |
| 12_30456 | 5H | 107.19 |
| 12_30459 | 2H | 131.03 |
| 12_30467 | 3H | 53.86  |
| 12_30473 | 6H | 56.06  |
| 12_30474 | 3H | 59.83  |
| 12_30475 | 7H | 82.41  |
| 12_30476 | 4H | 139.97 |
| 12_30477 | 0  | 0      |
| 12_30488 | 4H | 56.22  |
| 12_30491 | 2H | 49.5   |
| 12_30492 | 7H | 81.78  |
| 12_30494 | 5H | 171.58 |
| 12_30496 | 7H | 79.08  |
| 12_30498 | 1H | 42.42  |
| 12_30502 | 0  | 0      |
| 12_30503 | 0  | 0      |
| 12_30504 | 5H | 173.5  |
| 12_30505 | 1H | 73.78  |
| 12_30506 | 7H | 83.42  |
| 12_30508 | 6H | 59.25  |
| 12_30509 | 1H | 107.09 |
| 12_30510 | 6H | 52.85  |
| 12_30514 | 2H | 68.07  |
| 12_30516 | 6H | 46.44  |
| 12_30517 | 0  | 0      |
| 12_30521 | 6H | 41.55  |
| 12_30522 | 1H | 47.21  |
| 12_30524 | 5H | 116.66 |
| 12_30525 | 4H | 56.22  |
| 12_30528 | 7H | 42.26  |
| 12_30530 | 7H | 20.29  |
| 12_30532 | 1H | 105.77 |
| 12_30533 | 5H | 86.74  |
| 12_30538 | 5H | 50.53  |
| 12_30543 | 5H | 1.91   |
| 12_30544 | 7H | 81.78  |
| 12_30545 | 7H | 46.44  |
| 12_30546 | 1H | 94.15  |
| 12_30550 | 7H | 81.78  |
| 12_30554 | 4H | 102.93 |
| 12_30556 | 5H | 139    |
| 12_30557 | 2H | 62.85  |
| 12_30561 | 2H | 68.07  |

|          |    |        |
|----------|----|--------|
| 12_30562 | 1H | 42.42  |
| 12_30563 | 7H | 81.78  |
| 12_30564 | 4H | 53.28  |
| 12_30565 | 7H | 83.42  |
| 12_30566 | 5H | 162.68 |
| 12_30567 | 6H | 59.25  |
| 12_30571 | 3H | 32.92  |
| 12_30573 | 6H | 88.88  |
| 12_30574 | 7H | 82.41  |
| 12_30575 | 5H | 42.41  |
| 12_30576 | 7H | 52.52  |
| 12_30577 | 5H | 177.9  |
| 12_30580 | 5H | 143.94 |
| 12_30581 | 7H | 79.08  |
| 12_30582 | 2H | 68.07  |
| 12_30583 | 3H | 58.51  |
| 12_30584 | 4H | 105.17 |
| 12_30588 | 1H | 12.94  |
| 12_30589 | 7H | 81.78  |
| 12_30590 | 5H | 121.67 |
| 12_30591 | 5H | 6.36   |
| 12_30593 | 7H | 146.93 |
| 12_30594 | 0  | 0      |
| 12_30598 | 2H | 135.68 |
| 12_30600 | 7H | 81.78  |
| 12_30603 | 0  | 0      |
| 12_30604 | 2H | 55.46  |
| 12_30605 | 4H | 56.22  |
| 12_30609 | 3H | 52.17  |
| 12_30611 | 5H | 121.67 |
| 12_30616 | 3H | 78.25  |
| 12_30618 | 3H | 64.6   |
| 12_30619 | 5H | 108.28 |
| 12_30620 | 4H | 76.31  |
| 12_30621 | 7H | 81.78  |
| 12_30622 | 0  | 0      |
| 12_30626 | 6H | 103.32 |
| 12_30631 | 2H | 12.07  |
| 12_30634 | 2H | 65.53  |
| 12_30635 | 5H | 135.62 |
| 12_30637 | 6H | 72.17  |
| 12_30640 | 3H | 108.7  |
| 12_30642 | 5H | 157.61 |
| 12_30644 | 5H | 50.53  |
| 12_30645 | 7H | 84.3   |
| 12_30646 | 0  | 0      |
| 12_30651 | 6H | 7.87   |
| 12_30653 | 0  | 0      |
| 12_30654 | 5H | 38.78  |



|          |    |        |
|----------|----|--------|
| 12_30655 | 0  | 0      |
| 12_30656 | 5H | 169.72 |
| 12_30657 | 2H | 42.01  |
| 12_30658 | 6H | 52.19  |
| 12_30663 | 3H | 100.29 |
| 12_30666 | 5H | 162.03 |
| 12_30668 | 5H | 130.98 |
| 12_30672 | 0  | 0      |
| 12_30674 | 2H | 85.52  |
| 12_30677 | 3H | 93.81  |
| 12_30680 | 3H | 61.94  |
| 12_30683 | 1H | 40.4   |
| 12_30685 | 0  | 0      |
| 12_30690 | 2H | 145.69 |
| 12_30693 | 4H | 79.47  |
| 12_30694 | 1H | 45.2   |
| 12_30696 | 2H | 89.68  |
| 12_30697 | 6H | 32.27  |
| 12_30698 | 6H | 98.68  |
| 12_30700 | 5H | 50.53  |
| 12_30703 | 2H | 50.99  |
| 12_30705 | 5H | 103.01 |
| 12_30707 | 5H | 36.72  |
| 12_30709 | 5H | 42.41  |
| 12_30710 | 1H | 49.65  |
| 12_30714 | 5H | 13.83  |
| 12_30715 | 1H | 3.21   |
| 12_30716 | 0  | 0      |
| 12_30717 | 5H | 42.41  |
| 12_30718 | 4H | 102.26 |
| 12_30721 | 3H | 55.22  |
| 12_30723 | 7H | 14.39  |
| 12_30724 | 2H | 72.99  |
| 12_30728 | 5H | 42.41  |
| 12_30729 | 5H | 41.45  |
| 12_30734 | 6H | 119.56 |
| 12_30736 | 3H | 173.43 |
| 12_30737 | 3H | 59.83  |
| 12_30742 | 1H | 74.81  |
| 12_30743 | 3H | 87.8   |
| 12_30745 | 5H | 55.44  |
| 12_30748 | 0  | 0      |
| 12_30750 | 1H | 45.2   |
| 12_30752 | 7H | 46.44  |
| 12_30754 | 3H | 84.22  |
| 12_30755 | 4H | 77.66  |
| 12_30760 | 7H | 81.78  |
| 12_30761 | 7H | 141.15 |
| 12_30762 | 1H | 42.42  |

|          |    |        |
|----------|----|--------|
| 12_30765 | 6H | 59.25  |
| 12_30768 | 5H | 42.41  |
| 12_30772 | 2H | 66.2   |
| 12_30777 | 4H | 53.94  |
| 12_30779 | 0  | 0      |
| 12_30780 | 7H | 24.81  |
| 12_30781 | 2H | 9.12   |
| 12_30782 | 6H | 53.54  |
| 12_30783 | 6H | 44.96  |
| 12_30786 | 1H | 47.21  |
| 12_30788 | 3H | 78.25  |
| 12_30792 | 5H | 42.41  |
| 12_30793 | 0  | 0      |
| 12_30794 | 7H | 81.78  |
| 12_30795 | 5H | 148.58 |
| 12_30796 | 1H | 40.4   |
| 12_30797 | 7H | 116.94 |
| 12_30799 | 3H | 63.94  |
| 12_30802 | 6H | 58.48  |
| 12_30804 | 6H | 65.83  |
| 12_30806 | 7H | 99.94  |
| 12_30809 | 3H | 67.86  |
| 12_30818 | 0  | 0      |
| 12_30819 | 0  | 0      |
| 12_30820 | 1H | 4.71   |
| 12_30821 | 1H | 54.54  |
| 12_30822 | 0  | 0      |
| 12_30823 | 2H | 164.35 |
| 12_30824 | 4H | 146.48 |
| 12_30825 | 4H | 146.48 |
| 12_30826 | 7H | 162.03 |
| 12_30827 | 0  | 0      |
| 12_30828 | 2H | 67.08  |
| 12_30829 | 3H | 73.3   |
| 12_30830 | 5H | 149.27 |
| 12_30831 | 7H | 135.86 |
| 12_30832 | 7H | 79.08  |
| 12_30833 | 5H | 140.14 |
| 12_30834 | 5H | 88.05  |
| 12_30835 | 7H | 81.78  |
| 12_30836 | 7H | 5.43   |
| 12_30837 | 6H | 59.25  |
| 12_30838 | 5H | 35.39  |
| 12_30839 | 4H | 62.81  |
| 12_30840 | 0  | 0      |
| 12_30842 | 6H | 20.62  |
| 12_30843 | 6H | 24.91  |
| 12_30845 | 0  | 0      |
| 12_30847 | 5H | 98.2   |

|          |    |        |
|----------|----|--------|
| 12_30850 | 5H | 98.2   |
| 12_30851 | 7H | 9.73   |
| 12_30852 | 5H | 98.2   |
| 12_30853 | 2H | 66.2   |
| 12_30854 | 5H | 98.2   |
| 12_30855 | 5H | 96.12  |
| 12_30857 | 6H | 61.19  |
| 12_30858 | 0  | 0      |
| 12_30859 | 0  | 0      |
| 12_30860 | 3H | 145.84 |
| 12_30863 | 4H | 35.24  |
| 12_30865 | 4H | 35.24  |
| 12_30866 | 4H | 56.88  |
| 12_30867 | 0  | 0      |
| 12_30871 | 2H | 25.33  |
| 12_30872 | 2H | 25.33  |
| 12_30873 | 4H | 142.6  |
| 12_30877 | 0  | 0      |
| 12_30878 | 4H | 56.22  |
| 12_30879 | 7H | 55.64  |
| 12_30880 | 7H | 54.99  |
| 12_30893 | 7H | 31.35  |
| 12_30894 | 7H | 31.35  |
| 12_30895 | 7H | 31.35  |
| 12_30896 | 2H | 99.39  |
| 12_30904 | 4H | 77.66  |
| 12_30905 | 4H | 77.66  |
| 12_30907 | 4H | 30.37  |
| 12_30908 | 0  | 0      |
| 12_30910 | 3H | 14     |
| 12_30913 | 3H | 48.88  |
| 12_30914 | 2H | 156.77 |
| 12_30917 | 0  | 0      |
| 12_30919 | 1H | 11.35  |
| 12_30921 | 3H | 163.49 |
| 12_30922 | 3H | 60.58  |
| 12_30923 | 3H | 60.58  |
| 12_30926 | 0  | 0      |
| 12_30927 | 3H | 127.26 |
| 12_30929 | 5H | 132.32 |
| 12_30930 | 5H | 132.32 |
| 12_30931 | 6H | 104.5  |
| 12_30933 | 1H | 6.98   |
| 12_30934 | 1H | 143.2  |
| 12_30935 | 0  | 0      |
| 12_30939 | 0  | 0      |
| 12_30940 | 6H | 88.88  |
| 12_30942 | 2H | 147.37 |
| 12_30944 | 0  | 0      |

|          |    |        |
|----------|----|--------|
| 12_30945 | 0  | 0      |
| 12_30948 | 1H | 15.91  |
| 12_30949 | 0  | 0      |
| 12_30950 | 1H | 11.35  |
| 12_30953 | 3H | 40.99  |
| 12_30956 | 6H | 142.2  |
| 12_30957 | 0  | 0      |
| 12_30958 | 5H | 189.22 |
| 12_30959 | 7H | 0      |
| 12_30962 | 0  | 0      |
| 12_30963 | 3H | 137.74 |
| 12_30965 | 0  | 0      |
| 12_30967 | 0  | 0      |
| 12_30969 | 1H | 0.31   |
| 12_30972 | 0  | 0      |
| 12_30973 | 3H | 141.26 |
| 12_30974 | 7H | 157.44 |
| 12_30975 | 5H | 4.15   |
| 12_30976 | 5H | 1.91   |
| 12_30977 | 5H | 4.15   |
| 12_30979 | 5H | 4.15   |
| 12_30980 | 5H | 1.91   |
| 12_30981 | 0  | 0      |
| 12_30988 | 4H | 111.81 |
| 12_30993 | 4H | 49.43  |
| 12_30995 | 4H | 62.81  |
| 12_30996 | 7H | 94.34  |
| 12_30998 | 7H | 85.28  |
| 12_30999 | 0  | 0      |
| 12_31000 | 7H | 81.78  |
| 12_31004 | 6H | 58.48  |
| 12_31005 | 6H | 58.48  |
| 12_31006 | 6H | 60.65  |
| 12_31008 | 3H | 65.25  |
| 12_31009 | 3H | 50.85  |
| 12_31010 | 3H | 67.86  |
| 12_31011 | 3H | 71.26  |
| 12_31012 | 3H | 65.25  |
| 12_31014 | 3H | 67.86  |
| 12_31015 | 3H | 60.58  |
| 12_31016 | 3H | 71.26  |
| 12_31017 | 3H | 67.86  |
| 12_31018 | 3H | 100.29 |
| 12_31020 | 2H | 82.44  |
| 12_31021 | 2H | 82.44  |
| 12_31023 | 5H | 4.15   |
| 12_31032 | 5H | 52.86  |
| 12_31033 | 5H | 52.86  |
| 12_31035 | 5H | 52.86  |

|          |    |        |
|----------|----|--------|
| 12_31041 | 0  | 0      |
| 12_31042 | 6H | 112.39 |
| 12_31043 | 6H | 112.39 |
| 12_31044 | 6H | 112.39 |
| 12_31048 | 6H | 112.39 |
| 12_31049 | 6H | 112.39 |
| 12_31050 | 5H | 143.29 |
| 12_31053 | 0  | 0      |
| 12_31054 | 0  | 0      |
| 12_31055 | 0  | 0      |
| 12_31059 | 0  | 0      |
| 12_31062 | 5H | 51.51  |
| 12_31064 | 5H | 51.51  |
| 12_31065 | 0  | 0      |
| 12_31066 | 0  | 0      |
| 12_31071 | 0  | 0      |
| 12_31081 | 1H | 143.2  |
| 12_31086 | 0  | 0      |
| 12_31088 | 6H | 83.81  |
| 12_31092 | 6H | 52.85  |
| 12_31094 | 5H | 11.45  |
| 12_31095 | 2H | 133.04 |
| 12_31096 | 0  | 0      |
| 12_31099 | 0  | 0      |
| 12_31100 | 2H | 142.67 |
| 12_31101 | 6H | 80.86  |
| 12_31109 | 0  | 0      |
| 12_31111 | 6H | 83.28  |
| 12_31113 | 0  | 0      |
| 12_31115 | 6H | 112.39 |
| 12_31117 | 5H | 46.38  |
| 12_31120 | 7H | 75.52  |
| 12_31122 | 3H | 59.83  |
| 12_31123 | 5H | 189.89 |
| 12_31126 | 6H | 131.64 |
| 12_31127 | 0  | 0      |
| 12_31134 | 1H | 45.2   |
| 12_31138 | 4H | 118.95 |
| 12_31139 | 4H | 114.61 |
| 12_31144 | 1H | 4.71   |
| 12_31148 | 4H | 88.3   |
| 12_31151 | 0  | 0      |
| 12_31153 | 3H | 80.49  |
| 12_31159 | 3H | 40.99  |
| 12_31160 | 1H | 74.81  |
| 12_31161 | 0  | 0      |
| 12_31163 | 1H | 95.14  |
| 12_31164 | 4H | 33.35  |
| 12_31165 | 5H | 147.49 |

|          |    |        |
|----------|----|--------|
| 12_31166 | 7H | 145.6  |
| 12_31167 | 0  | 0      |
| 12_31173 | 7H | 5.43   |
| 12_31174 | 6H | 60.65  |
| 12_31175 | 2H | 68.07  |
| 12_31179 | 1H | 61.39  |
| 12_31180 | 2H | 168.26 |
| 12_31181 | 0  | 0      |
| 12_31182 | 5H | 141.88 |
| 12_31183 | 5H | 50.53  |
| 12_31186 | 4H | 72.36  |
| 12_31187 | 6H | 59.25  |
| 12_31189 | 2H | 67.08  |
| 12_31194 | 0  | 0      |
| 12_31200 | 0  | 0      |
| 12_31202 | 0  | 0      |
| 12_31203 | 0  | 0      |
| 12_31205 | 2H | 99.39  |
| 12_31206 | 5H | 144.6  |
| 12_31207 | 0  | 0      |
| 12_31208 | 1H | 42.42  |
| 12_31209 | 2H | 156.77 |
| 12_31210 | 5H | 187.2  |
| 12_31215 | 7H | 81.78  |
| 12_31218 | 2H | 67.08  |
| 12_31219 | 0  | 0      |
| 12_31220 | 3H | 129.83 |
| 12_31221 | 5H | 148.58 |
| 12_31222 | 0  | 0      |
| 12_31224 | 2H | 4.59   |
| 12_31225 | 6H | 105.05 |
| 12_31229 | 0  | 0      |
| 12_31230 | 0  | 0      |
| 12_31231 | 4H | 86.01  |
| 12_31234 | 5H | 141.88 |
| 12_31235 | 6H | 103.32 |
| 12_31236 | 5H | 103.01 |
| 12_31237 | 5H | 132.32 |
| 12_31238 | 3H | 135.43 |
| 12_31239 | 0  | 0      |
| 12_31240 | 0  | 0      |
| 12_31242 | 3H | 82.62  |
| 12_31246 | 4H | 92.41  |
| 12_31249 | 6H | 59.25  |
| 12_31250 | 6H | 80.06  |
| 12_31251 | 3H | 147.57 |
| 12_31254 | 0  | 0      |
| 12_31256 | 2H | 73.89  |
| 12_31257 | 5H | 39.48  |

|          |    |        |
|----------|----|--------|
| 12_31259 | 5H | 42.41  |
| 12_31261 | 7H | 108.78 |
| 12_31262 | 3H | 93.81  |
| 12_31264 | 2H | 135.68 |
| 12_31267 | 0  | 0      |
| 12_31268 | 2H | 147.37 |
| 12_31270 | 0  | 0      |
| 12_31271 | 5H | 86.08  |
| 12_31274 | 6H | 52.85  |
| 12_31276 | 1H | 25.5   |
| 12_31277 | 6H | 129.07 |
| 12_31279 | 0  | 0      |
| 12_31280 | 5H | 52.86  |
| 12_31284 | 2H | 15.98  |
| 12_31286 | 0  | 0      |
| 12_31288 | 2H | 63.55  |
| 12_31289 | 6H | 77.53  |
| 12_31292 | 5H | 184.99 |
| 12_31293 | 2H | 93.26  |
| 12_31294 | 7H | 105.73 |
| 12_31297 | 4H | 62.81  |
| 12_31298 | 3H | 40.99  |
| 12_31299 | 3H | 98.05  |
| 12_31305 | 7H | 34.15  |
| 12_31308 | 6H | 33.72  |
| 12_31312 | 5H | 38.78  |
| 12_31313 | 4H | 32.92  |
| 12_31315 | 0  | 0      |
| 12_31319 | 1H | 100.4  |
| 12_31323 | 3H | 83.58  |
| 12_31324 | 4H | 0.75   |
| 12_31325 | 7H | 142.46 |
| 12_31326 | 0  | 0      |
| 12_31327 | 0  | 0      |
| 12_31329 | 3H | 125.86 |
| 12_31333 | 0  | 0      |
| 12_31340 | 5H | 51.51  |
| 12_31346 | 3H | 88.5   |
| 12_31350 | 7H | 3.49   |
| 12_31351 | 7H | 24.15  |
| 12_31352 | 5H | 181.21 |
| 12_31353 | 6H | 111.08 |
| 12_31356 | 3H | 85.4   |
| 12_31357 | 0  | 0      |
| 12_31360 | 4H | 56.22  |
| 12_31361 | 5H | 80.18  |
| 12_31362 | 4H | 83.75  |
| 12_31363 | 7H | 116.94 |
| 12_31366 | 5H | 136.94 |

|          |    |        |
|----------|----|--------|
| 12_31367 | 3H | 106    |
| 12_31368 | 3H | 67.86  |
| 12_31374 | 7H | 126.83 |
| 12_31375 | 5H | 157.61 |
| 12_31377 | 1H | 128.04 |
| 12_31380 | 2H | 85.52  |
| 12_31381 | 1H | 44.59  |
| 12_31382 | 4H | 53.94  |
| 12_31383 | 2H | 84.96  |
| 12_31385 | 4H | 77.66  |
| 12_31387 | 1H | 129.71 |
| 12_31390 | 5H | 41.45  |
| 12_31392 | 6H | 127.76 |
| 12_31393 | 3H | 71.26  |
| 12_31394 | 2H | 85.52  |
| 12_31395 | 7H | 99.94  |
| 12_31396 | 0  | 0      |
| 12_31398 | 2H | 89.68  |
| 12_31401 | 1H | 61.39  |
| 12_31406 | 2H | 136.33 |
| 12_31408 | 0  | 0      |
| 12_31409 | 3H | 9.56   |
| 12_31410 | 0  | 0      |
| 12_31411 | 0  | 0      |
| 12_31414 | 0  | 0      |
| 12_31417 | 5H | 96.12  |
| 12_31418 | 7H | 81.78  |
| 12_31422 | 4H | 144.09 |
| 12_31423 | 5H | 41.45  |
| 12_31424 | 2H | 101.72 |
| 12_31427 | 5H | 79.52  |
| 12_31428 | 3H | 0      |
| 12_31431 | 0  | 0      |
| 12_31432 | 6H | 107.49 |
| 12_31433 | 6H | 52.85  |
| 12_31440 | 7H | 105.07 |
| 12_31441 | 7H | 64.98  |
| 12_31443 | 6H | 59.25  |
| 12_31445 | 2H | 90.48  |
| 12_31446 | 2H | 0.66   |
| 12_31448 | 3H | 6.31   |
| 12_31450 | 7H | 7.87   |
| 12_31452 | 7H | 69.55  |
| 12_31458 | 4H | 12.34  |
| 12_31461 | 2H | 155.68 |
| 12_31462 | 4H | 62.81  |
| 12_31463 | 7H | 61.67  |
| 12_31464 | 1H | 64.44  |
| 12_31467 | 1H | 40.4   |



|          |    |        |
|----------|----|--------|
| 12_31469 | 6H | 136.66 |
| 12_31473 | 0  | 0      |
| 12_31477 | 5H | 56.77  |
| 12_31479 | 0  | 0      |
| 12_31484 | 0  | 0      |
| 12_31485 | 6H | 32.98  |
| 12_31486 | 4H | 6.86   |
| 12_31490 | 0  | 0      |
| 12_31493 | 4H | 77.66  |
| 12_31495 | 6H | 122.14 |
| 12_31498 | 6H | 136.66 |
| 12_31499 | 3H | 131.24 |
| 12_31500 | 3H | 160.19 |
| 12_31502 | 3H | 67.27  |
| 12_31506 | 2H | 166.6  |
| 12_31509 | 6H | 59.25  |
| 12_31511 | 0  | 0      |
| 12_31512 | 5H | 41.45  |
| 12_31513 | 0  | 0      |
| 12_31515 | 4H | 76.31  |
| 12_31517 | 0  | 0      |
| 12_31520 | 5H | 42.41  |
| 12_31521 | 0  | 0      |
| 12_31523 | 0  | 0      |
| 12_31525 | 3H | 134.05 |
| 12_31527 | 2H | 165.28 |
| 12_31529 | 3H | 85.4   |
| 12_31535 | 7H | 124.5  |
| 12_31536 | 4H | 79.47  |

---

**Table S6 SNPs with  $F_{ST}$  based on the Eastern and Western populations above 95<sup>th</sup> percentile genome-wide, including genetic position, GenBank ID, gene short name, in non-coding or coding region (1<sup>st</sup>, 2<sup>nd</sup> or 3<sup>rd</sup> positions), and silent or replacement information**

| SNP Name | Chr | cM     | $F_{ST}$ | GenBank ID   | Gene Short Name | Position   | Silent |
|----------|-----|--------|----------|--------------|-----------------|------------|--------|
| 11_10017 | 2H  | 81.31  | 0.32     | AK353943     | -               | 3          | yes    |
| 11_10056 | 7H  | 33.49  | 0.41     | AK364330     | -               | non-coding | yes    |
| 11_10116 | 5H  | 41.45  | 0.36     | AK356434     | -               | 3          | yes    |
| 11_10243 | 2H  | 67.08  | 0.41     | XM_003579657 | LOC100838855    | non-coding | yes    |
| 11_10253 | 3H  | 102.66 | 0.36     | -            | -               | -          | -      |
| 11_10424 | 4H  | 56.22  | 0.42     | AK355297     | -               | 3          | yes    |
| 11_10498 | 2H  | 53.09  | 0.35     | AK354555     | -               | 1          | yes    |
| 11_10536 | 5H  | 155.23 | 0.49     | AK354787     | -               | 3          | yes    |
| 11_10614 | 4H  | 111.81 | 0.33     | AK373775     | -               | 3          | yes    |
| 11_10644 | 1H  | 128.63 | 0.32     | AK356375     | -               | non-coding | yes    |
| 11_10685 | 2H  | 72.99  | 0.47     | AK362284     | -               | 3          | yes    |
| 11_10773 | 7H  | 81.78  | 0.36     | AK373162     | -               | non-coding | yes    |
| 11_10813 | 3H  | 83.58  | 0.35     | -            | -               | -          | -      |
| 11_10956 | 7H  | 27.69  | 0.38     | AK365588     | -               | 3          | yes    |
| 11_11024 | 5H  | 121.67 | 0.48     | XM_003561753 | LOC100839369    | 3          | yes    |
| 11_11094 | 2H  | 119.72 | 0.38     | -            | -               | -          | -      |
| 11_11111 | 6H  | 139.09 | 0.39     | AK366470     | -               | non-coding | yes    |
| 11_11243 | 7H  | 121.36 | 0.33     | -            | -               | -          | -      |
| 11_11432 | 5H  | 38.78  | 0.56     | -            | -               | -          | -      |
| 11_20029 | 6H  | 133.25 | 0.51     | AK354118     | -               | 1          | no     |
| 11_20086 | 2H  | 110.93 | 0.32     | AK358640     | -               | non-coding | yes    |
| 11_20133 | 1H  | 132.16 | 0.47     | AK361091     | -               | non-coding | yes    |
| 11_20251 | 2H  | 68.56  | 0.36     | AK370757     | -               | non-coding | yes    |
| 11_20283 | 5H  | 51.51  | 0.32     | XM_003576993 | LOC100831472    | 3          | yes    |
| 11_20347 | 5H  | 121.67 | 0.48     | AK359986     | -               | 3          | yes    |
| 11_20390 | 2H  | 72.99  | 0.46     | FN179383     | SBE2a           | 3          | yes    |
| 11_20476 | 2H  | 67.08  | 0.33     | BT087333     | -               | non-coding | yes    |
| 11_20482 | 4H  | 69.24  | 0.31     | AK355084     | -               | 3          | yes    |
| 11_20498 | 2H  | 116.5  | 0.4      | AK359654     | -               | 3          | yes    |
| 11_20577 | 6H  | 80.06  | 0.31     | AK355031     | -               | non-coding | yes    |
| 11_20620 | 6H  | 78.52  | 0.31     | AK366751     | -               | non-coding | yes    |
| 11_20669 | 2H  | 68.56  | 0.34     | AK356298     | -               | non-coding | yes    |
| 11_20798 | 1H  | 48.99  | 0.32     | AK354088     | -               | non-coding | yes    |
| 11_20904 | 6H  | 72.17  | 0.36     | -            | -               | -          | -      |
| 11_21302 | 7H  | 81.78  | 0.33     | XM_003560861 | LOC100844834    | non-coding | yes    |

|          |    |        |      |              |              |            |     |
|----------|----|--------|------|--------------|--------------|------------|-----|
| 11_21399 | 2H | 72.99  | 0.69 | AK357878     | -            | 1          | no  |
| 11_21406 | 2H | 142.67 | 0.34 | AK370573     | -            | 2          | no  |
| 11_21447 | 5H | 41.45  | 0.53 | AK364513     | -            | 2          | no  |
| 11_21452 | 5H | 155.23 | 0.53 | AK372156     | -            | 1          | no  |
| 11_21502 | 3H | 76.43  | 0.55 | AK356987     | -            | 3          | yes |
| 11_21504 | 4H | 80.73  | 0.45 | -            | -            | -          | -   |
| 12_10053 | 4H | 76.31  | 0.46 | AK370758     | -            | 3          | yes |
| 12_10071 | 6H | 130.38 | 0.47 | AK355485     | -            | non-coding | yes |
| 12_10154 | 2H | 69.05  | 0.71 | AK355324     | -            | non-coding | yes |
| 12_10170 | 4H | 88.7   | 0.44 | AK373474     | -            | non-coding | yes |
| 12_10171 | 4H | 43.72  | 0.34 | AK368127     | -            | 1          | no  |
| 12_10199 | 6H | 49.67  | 0.64 | AK376992     | -            | non-coding | yes |
| 12_10203 | 5H | 59.72  | 0.52 | AK356265     | -            | 3          | yes |
| 12_10219 | 0  | 0      | 0.33 | AY039003     | Xantha-f     | 3          | yes |
| 12_10264 | 5H | 47.04  | 0.52 | WHTE1A       | E1           | non-coding | yes |
| 12_10284 | 0  | 0      | 0.47 | XM_003564030 | LOC100843138 | 3          | yes |
| 12_10347 | 4H | 43.72  | 0.5  | AK362515     | -            | non-coding | yes |
| 12_10472 | 2H | 147.37 | 0.31 | AK356296     | -            | non-coding | yes |
| 12_10497 | 6H | 56.06  | 0.48 | XM_003570288 | LOC100839823 | 1          | no  |
| 12_10543 | 7H | 121.36 | 0.4  | DQ529207     | Xantha-h     | non-coding | yes |
| 12_10591 | 6H | 59.25  | 0.44 | AK361815     | -            | 1          | no  |
| 12_10633 | 5H | 69.29  | 0.32 | AK371801     | -            | non-coding | yes |
| 12_10634 | 5H | 68.21  | 0.32 | AK360310     | -            | 3          | yes |
| 12_10689 | 0  | 0      | 0.38 | AK369452     | -            | non-coding | yes |
| 12_10810 | 4H | 37.88  | 0.69 | AK366265     | -            | non-coding | yes |
| 12_11030 | 2H | 6.09   | 0.31 | AK364311     | -            | non-coding | yes |
| 12_11107 | 1H | 47.21  | 0.35 | AK364999     | -            | non-coding | yes |
| 12_11139 | 4H | 111.81 | 0.38 | Y14573       | Mlo          | 3          | yes |
| 12_11151 | 5H | 51.51  | 0.88 | AK354730     | -            | 3          | yes |
| 12_11184 | 7H | 118.44 | 0.42 | AK358083     | -            | non-coding | yes |
| 12_11269 | 0  | 0      | 0.41 | AK361959     | -            | 1          | no  |
| 12_11271 | 1H | 136.7  | 0.4  | -            | -            | -          | -   |
| 12_11288 | 2H | 67.08  | 0.52 | AK366035     | -            | 3          | no  |
| 12_11310 | 3H | 13.13  | 0.36 | AK372013     | -            | 3          | yes |
| 12_11316 | 2H | 73.89  | 0.49 | AK354712     | -            | non-coding | yes |
| 12_11324 | 2H | 72.99  | 0.91 | AK356277     | -            | non-coding | yes |
| 12_11377 | 7H | 84.3   | 0.34 | AK361273     | -            | 3          | yes |
| 12_11408 | 0  | 0      | 0.41 | -            | -            | -          | -   |
| 12_20196 | 2H | 67.08  | 0.55 | AK362518     | -            | non-coding | yes |

|          |    |        |      |              |              |            |     |
|----------|----|--------|------|--------------|--------------|------------|-----|
| 12_20235 | 2H | 61.49  | 0.4  | AK376421     | -            | non-coding | yes |
| 12_20278 | 5H | 59.72  | 0.52 | AK356265     | -            | 1          | no  |
| 12_20326 | 2H | 42.01  | 0.36 | AK365480     | -            | non-coding | yes |
| 12_20593 | 2H | 29.05  | 0.44 | AK367163     | -            | non-coding | yes |
| 12_20760 | 4H | 138.7  | 0.39 | -            | -            | -          | -   |
| 12_20981 | 5H | 51.51  | 0.85 | AK370568     | -            | 3          | yes |
| 12_20989 | 2H | 130.38 | 0.51 | XM_003580352 | LOC100845048 | 2          | no  |
| 12_21003 | 0  | 0      | 0.76 | -            | -            | -          | -   |
| 12_21117 | 4H | 0      | 0.32 | AK359776     | -            | non-coding | yes |
| 12_21234 | 7H | 68.89  | 0.54 | AK356095     | -            | 2          | no  |
| 12_21319 | 7H | 82.41  | 0.37 | XM_003573274 | LOC100845308 | non-coding | yes |
| 12_30004 | 7H | 81.78  | 0.34 | -            | -            | -          | -   |
| 12_30049 | 2H | 118.39 | 0.41 | -            | -            | -          | -   |
| 12_30056 | 5H | 107.19 | 0.35 | AK356430     | -            | non-coding | yes |
| 12_30068 | 2H | 67.08  | 0.52 | AK364966     | -            | 3          | yes |
| 12_30164 | 7H | 118.44 | 0.41 | AK360970     | -            | non-coding | yes |
| 12_30250 | 3H | 106.67 | 0.65 | AK356601     | -            | non-coding | yes |
| 12_30441 | 6H | 58.48  | 0.36 | XM_003570517 | LOC100832867 | 3          | yes |
| 12_30492 | 7H | 81.78  | 0.41 | EU961304     | -            | 1          | no  |
| 12_30504 | 5H | 173.5  | 0.32 | -            | -            | -          | -   |
| 12_30563 | 7H | 81.78  | 0.33 | AJ582181     | core3ft      | 2          | no  |
| 12_30581 | 7H | 79.08  | 0.45 | AK356791     | -            | 3          | yes |
| 12_30600 | 7H | 81.78  | 0.54 | AK362488     | -            | non-coding | yes |
| 12_30616 | 3H | 78.25  | 0.58 | AK365474     | -            | non-coding | yes |
| 12_30694 | 1H | 45.2   | 0.6  | -            | -            | -          | -   |
| 12_30737 | 3H | 59.83  | 0.39 | AK361759     | -            | 3          | yes |
| 12_30765 | 6H | 59.25  | 0.44 | AK356029     | -            | 3          | yes |
| 12_30823 | 2H | 164.35 | 0.32 | AK375658     | -            | 3          | no  |
| 12_30850 | 5H | 98.2   | 0.63 | DQ480160     | CBF4B        | non-coding | yes |
| 12_30956 | 6H | 142.2  | 0.35 | -            | -            | -          | -   |
| 12_30988 | 4H | 111.81 | 0.52 | Y14573       | Mlo          | non-coding | yes |
| 12_31017 | 3H | 67.86  | 0.31 | AK356796     | -            | non-coding | yes |
| 12_31021 | 2H | 82.44  | 0.51 | AF112963     | Cht2         | non-coding | yes |
| 12_31032 | 5H | 52.86  | 0.33 | AF326715     | adh3         | non-coding | yes |
| 12_31035 | 5H | 52.86  | 0.33 | DQ195967     | adh3         | non-coding | yes |
| 12_31043 | 6H | 112.39 | 0.31 | AY349220     | Dhn5         | 3          | yes |
| 12_31062 | 5H | 51.51  | 0.48 | AK365941     | -            | 3          | yes |
| 12_31064 | 5H | 51.51  | 0.68 | AK365941     | -            | 3          | yes |
| 12_31100 | 2H | 142.67 | 0.34 | AK370573     | -            | 2          | no  |

|          |    |       |      |          |   |            |     |
|----------|----|-------|------|----------|---|------------|-----|
| 12_31202 | 0  | 0     | 0.33 | AK358464 | - | non-coding | yes |
| 12_31203 | 0  | 0     | 0.34 | AK368679 | - | non-coding | yes |
| 12_31242 | 3H | 82.62 | 0.36 | AK369382 | - | non-coding | yes |
| 12_31246 | 4H | 92.41 | 0.48 | AK362249 | - | non-coding | yes |
| 12_31274 | 6H | 52.85 | 0.38 | AK357603 | - | non-coding | yes |
| 12_31385 | 4H | 77.66 | 0.32 | AK357832 | - | non-coding | yes |

---

**Table S7 SNPs with Bayes Factor from environmental association analysis (Bayenv) above 95<sup>th</sup> percentile genome-wide, including genetic position, GenBank ID, gene short name, in non-coding or coding region (1<sup>st</sup>, 2<sup>nd</sup> or 3<sup>rd</sup> positions), and silent or replacement information. (A) PC1; (B) PC2**

(A)

| SNP Name | Chr | cM     | Bayes Factor | GenBank ID   | Gene Short Name | Position   | Silent |
|----------|-----|--------|--------------|--------------|-----------------|------------|--------|
| 11_10011 | 3H  | 67.86  | 9.22         | AK371824     | -               | non-coding | yes    |
| 11_10090 | 4H  | 86.01  | 3.91         | AK376851     | -               | non-coding | yes    |
| 11_10172 | 3H  | 82.62  | 5.04         | AK366339     | -               | non-coding | yes    |
| 11_10184 | 3H  | 110.75 | 3.72         | AK359211     | -               | 3          | yes    |
| 11_10208 | 4H  | 2.6    | 3.76         | AK359180     | -               | 3          | yes    |
| 11_10232 | 7H  | 29.05  | 3.89         | -            | -               | -          | -      |
| 11_10247 | 4H  | 87.01  | 4.32         | AJ585385     | bcb             | 3          | no     |
| 11_10253 | 3H  | 102.66 | 6.72         | -            | -               | -          | -      |
| 11_10446 | 2H  | 140.69 | 4.00         | XM_003560174 | LOC100837523    | 1          | no     |
| 11_10641 | 5H  | 59.72  | 4.10         | AK355250     | -               | 3          | yes    |
| 11_10653 | 3H  | 69.4   | 4.18         | AK356876     | -               | 2          | no     |
| 11_10744 | 1H  | 23.62  | 4.80         | AK353610     | -               | non-coding | yes    |
| 11_10813 | 3H  | 83.58  | 8.40         | -            | -               | -          | -      |
| 11_10818 | 2H  | 90.48  | 5.18         | AK360545     | -               | non-coding | yes    |
| 11_10925 | 3H  | 66.62  | 3.83         | AK363708     | -               | non-coding | yes    |
| 11_10989 | 2H  | 125.97 | 6.42         | BLYCLDAB     | cold-regulated  | non-coding | yes    |
| 11_11111 | 6H  | 139.09 | 4.38         | AK366470     | -               | non-coding | yes    |
| 11_11211 | 2H  | 67.08  | 4.06         | -            | -               | -          | -      |
| 11_11361 | 0   | 0      | 9.94         | JF796668     | CBF4            | 2          | no     |
| 11_11497 | 5H  | 151.35 | 6.31         | AK358288     | -               | 3          | yes    |
| 11_11521 | 7H  | 127.74 | 18.19        | AK376764     | -               | 3          | yes    |
| 11_20012 | 4H  | 43.72  | 3.87         | AK374823     | -               | non-coding | yes    |
| 11_20078 | 5H  | 155.66 | 5.77         | AK376547     | -               | 3          | yes    |
| 11_20113 | 7H  | 49.61  | 5.40         | AK355306     | -               | non-coding | yes    |
| 11_20133 | 1H  | 132.16 | 3.67         | AK361091     | -               | non-coding | yes    |
| 11_20251 | 2H  | 68.56  | 5.27         | AK370757     | -               | non-coding | yes    |
| 11_20306 | 5H  | 50.53  | 5.22         | AK365203     | -               | non-coding | yes    |
| 11_20495 | 7H  | 18.73  | 3.96         | AK359539     | -               | non-coding | yes    |
| 11_20537 | 6H  | 142.2  | 4.60         | FJ853600     | GSL2            | non-coding | yes    |
| 11_20583 | 3H  | 66.62  | 4.92         | AK365999     | -               | non-coding | yes    |
| 11_20620 | 6H  | 78.52  | 7.50         | AK366751     | -               | non-coding | yes    |
| 11_20626 | 3H  | 109.43 | 3.65         | AK366712     | -               | 3          | yes    |
| 11_20722 | 7H  | 13.7   | 5.24         | AK377052     | -               | 3          | yes    |
| 11_20797 | 3H  | 5.36   | 3.96         | AK375179     | -               | non-coding | yes    |

|          |    |        |       |              |              |            |     |
|----------|----|--------|-------|--------------|--------------|------------|-----|
| 11_21030 | 6H | 44.96  | 3.79  | AK375921     | -            | 2          | no  |
| 11_21083 | 3H | 111.49 | 4.11  | AK372580     | -            | non-coding | yes |
| 11_21174 | 1H | 8.96   | 4.49  | -            | -            | -          | -   |
| 11_21191 | 4H | 70.77  | 3.46  | AK355907     | -            | non-coding | yes |
| 11_21192 | 1H | 89.77  | 5.99  | AK357712     | -            | non-coding | yes |
| 11_21193 | 1H | 42.42  | 7.48  | AK363338     | -            | non-coding | yes |
| 11_21201 | 7H | 98.95  | 5.56  | -            | -            | -          | -   |
| 11_21216 | 6H | 59.25  | 5.25  | AK376749     | -            | 3          | yes |
| 11_21274 | 2H | 154.39 | 3.85  | AK354727     | -            | non-coding | yes |
| 11_21296 | 4H | 71.71  | 4.88  | AK353992     | -            | non-coding | yes |
| 11_21325 | 5H | 123.12 | 3.84  | AK362100     | -            | non-coding | yes |
| 11_21399 | 2H | 72.99  | 8.21  | AK357878     | -            | 1          | no  |
| 11_21406 | 2H | 142.67 | 3.68  | AK370573     | -            | 2          | no  |
| 11_21459 | 2H | 143.18 | 4.78  | AM039897     | ahh1         | 2          | no  |
| 11_21502 | 3H | 76.43  | 3.57  | AK356987     | -            | 3          | yes |
| 12_10122 | 3H | 143.33 | 4.09  | AK369540     | -            | non-coding | yes |
| 12_10154 | 2H | 69.05  | 14.43 | AK355324     | -            | non-coding | yes |
| 12_10199 | 6H | 49.67  | 4.42  | AK376992     | -            | non-coding | yes |
| 12_10268 | 7H | 81.78  | 5.32  | XM_003574799 | LOC100825330 | 3          | yes |
| 12_10535 | 1H | 91.73  | 9.41  | AK358527     | -            | 3          | yes |
| 12_10678 | 3H | 71.26  | 4.44  | AK356724     | -            | non-coding | yes |
| 12_10810 | 4H | 37.88  | 3.49  | AK366265     | -            | non-coding | yes |
| 12_10824 | 4H | 102.93 | 4.39  | XM_003577507 | LOC100843401 | non-coding | yes |
| 12_10938 | 1H | 44.59  | 4.96  | AK359548     | -            | 1          | no  |
| 12_11030 | 2H | 6.09   | 4.18  | AK364311     | -            | non-coding | yes |
| 12_11051 | 7H | 105.73 | 7.91  | -            | -            | -          | -   |
| 12_11151 | 5H | 51.51  | 3.94  | AK354730     | -            | 3          | yes |
| 12_11154 | 3H | 147.57 | 3.85  | -            | -            | -          | -   |
| 12_11271 | 1H | 136.7  | 11.25 | -            | -            | -          | -   |
| 12_11288 | 2H | 67.08  | 5.01  | AK366035     | -            | 3          | no  |
| 12_11324 | 2H | 72.99  | 41.73 | AK356277     | -            | non-coding | yes |
| 12_11386 | 0  | 0      | 5.77  | -            | -            | -          | -   |
| 12_11408 | 0  | 0      | 4.50  | -            | -            | -          | -   |
| 12_11455 | 6H | 44.96  | 4.34  | AK362081     | -            | non-coding | yes |
| 12_11494 | 6H | 111.74 | 3.53  | AK368552     | -            | non-coding | yes |
| 12_20235 | 2H | 61.49  | 5.61  | AK376421     | -            | non-coding | yes |
| 12_20760 | 4H | 138.7  | 8.63  | -            | -            | -          | -   |
| 12_20867 | 5H | 167.4  | 3.85  | AK359088     | -            | non-coding | yes |
| 12_20981 | 5H | 51.51  | 4.68  | AK370568     | -            | 3          | yes |

|          |    |        |       |              |              |            |     |
|----------|----|--------|-------|--------------|--------------|------------|-----|
| 12_21117 | 4H | 0      | 5.34  | AK359776     | -            | non-coding | yes |
| 12_21234 | 7H | 68.89  | 3.83  | AK356095     | -            | 2          | no  |
| 12_21319 | 7H | 82.41  | 4.40  | XM_003573274 | LOC100845308 | non-coding | yes |
| 12_21337 | 2H | 67.08  | 3.88  | AK358015     | -            | 3          | yes |
| 12_30004 | 7H | 81.78  | 4.04  | -            | -            | -          | -   |
| 12_30060 | 4H | 62.81  | 9.76  | AK365085     | -            | non-coding | yes |
| 12_30064 | 3H | 50.19  | 3.70  | AK367843     | -            | non-coding | yes |
| 12_30068 | 2H | 67.08  | 5.01  | AK364966     | -            | 3          | yes |
| 12_30080 | 5H | 60.21  | 3.66  | -            | -            | -          | -   |
| 12_30135 | 3H | 179.81 | 3.94  | AK356358     | -            | non-coding | yes |
| 12_30170 | 3H | 92.73  | 3.50  | AK353673     | -            | 3          | yes |
| 12_30206 | 2H | 67.08  | 3.88  | -            | -            | -          | -   |
| 12_30367 | 3H | 149.45 | 15.26 | AK353825     | -            | non-coding | yes |
| 12_30404 | 1H | 42.42  | 4.06  | AK355367     | -            | 3          | yes |
| 12_30475 | 7H | 82.41  | 5.64  | AK372209     | -            | non-coding | yes |
| 12_30491 | 2H | 49.5   | 3.90  | -            | -            | -          | -   |
| 12_30492 | 7H | 81.78  | 5.94  | EU961304     | -            | 1          | no  |
| 12_30504 | 5H | 173.5  | 6.24  | -            | -            | -          | -   |
| 12_30554 | 4H | 102.93 | 5.72  | AK354013     | -            | 2          | no  |
| 12_30574 | 7H | 82.41  | 4.96  | AK370386     | -            | 3          | yes |
| 12_30581 | 7H | 79.08  | 18.82 | AK356791     | -            | 3          | yes |
| 12_30674 | 2H | 85.52  | 4.34  | AK369978     | -            | non-coding | yes |
| 12_30715 | 1H | 3.21   | 4.57  | AK362579     | -            | non-coding | yes |
| 12_30724 | 2H | 72.99  | 3.51  | AK368064     | -            | 3          | yes |
| 12_30743 | 3H | 87.8   | 4.49  | AK364775     | -            | non-coding | yes |
| 12_30745 | 5H | 55.44  | 3.61  | AK366468     | -            | 3          | yes |
| 12_30779 | 0  | 0      | 5.07  | AK376832     | -            | non-coding | yes |
| 12_30781 | 2H | 9.12   | 4.05  | AK361785     | -            | non-coding | yes |
| 12_30782 | 6H | 53.54  | 6.44  | -            | -            | -          | -   |
| 12_30806 | 7H | 99.94  | 4.96  | -            | -            | -          | -   |
| 12_31032 | 5H | 52.86  | 3.59  | AF326715     | adh3         | non-coding | yes |
| 12_31066 | 0  | 0      | 4.85  | AK372734     | -            | 3          | yes |
| 12_31081 | 1H | 143.2  | 21.95 | AK356376     | -            | 3          | yes |
| 12_31100 | 2H | 142.67 | 3.68  | AK370573     | -            | 2          | no  |
| 12_31218 | 2H | 67.08  | 5.54  | AK368932     | -            | 2          | no  |
| 12_31234 | 5H | 141.88 | 9.78  | AK358248     | -            | non-coding | yes |
| 12_31357 | 0  | 0      | 6.10  | -            | -            | -          | -   |
| 12_31363 | 7H | 116.94 | 3.45  | AK375416     | -            | non-coding | yes |
| 12_31381 | 1H | 44.59  | 3.44  | -            | -            | -          | -   |



|          |    |        |       |          |   |            |     |
|----------|----|--------|-------|----------|---|------------|-----|
| 12_31383 | 2H | 84.96  | 3.84  | AK363632 | - | non-coding | yes |
| 12_31385 | 4H | 77.66  | 4.68  | AK357832 | - | non-coding | yes |
| 12_31392 | 6H | 127.76 | 5.64  | AK354269 | - | non-coding | yes |
| 12_31424 | 2H | 101.72 | 3.69  | AK375713 | - | non-coding | yes |
| 12_31486 | 4H | 6.86   | 30.04 | -        | - | -          | -   |

(B)

| SNP Name | Chr | cM     | Bayes Factor | GenBank ID | Gene Short Name | Position   | Silent |
|----------|-----|--------|--------------|------------|-----------------|------------|--------|
| 11_10006 | 1H  | 76.92  | 4.55         | AM502852   | tub4            | 3          | yes    |
| 11_10052 | 4H  | 76.31  | 3.08         | AK370758   | -               | non-coding | yes    |
| 11_10129 | 6H  | 44.96  | 4.94         | AK370146   | -               | 3          | yes    |
| 11_10172 | 3H  | 82.62  | 3.72         | AK366339   | -               | non-coding | yes    |
| 11_10194 | 2H  | 67.08  | 2.86         | AK359415   | -               | 3          | yes    |
| 11_10217 | 5H  | 149.94 | 3.16         | AK354403   | -               | non-coding | yes    |
| 11_10240 | 5H  | 42.41  | 2.81         | AK359441   | -               | non-coding | yes    |
| 11_10329 | 2H  | 168.26 | 3.71         | AK362809   | -               | non-coding | yes    |
| 11_10424 | 4H  | 56.22  | 2.83         | AK355297   | -               | 3          | yes    |
| 11_10522 | 1H  | 101.34 | 6.60         | AK360842   | -               | 1          | yes    |
| 11_10580 | 5H  | 29.9   | 18.54        | AK372891   | -               | non-coding | yes    |
| 11_10641 | 5H  | 59.72  | 5.49         | AK355250   | -               | 3          | yes    |
| 11_10653 | 3H  | 69.4   | 2.96         | AK356876   | -               | 2          | no     |
| 11_10767 | 3H  | 179.16 | 4.15         | -          | -               | -          | -      |
| 11_10780 | 2H  | 137.03 | 6.67         | AK359167   | -               | 3          | yes    |
| 11_10919 | 2H  | 42.01  | 2.92         | AK368475   | -               | non-coding | yes    |
| 11_11019 | 4H  | 146.48 | 2.85         | FN179393   | BAM1            | 2          | no     |
| 11_11111 | 6H  | 139.09 | 4.09         | AK366470   | -               | non-coding | yes    |
| 11_11147 | 6H  | 95.7   | 2.92         | GU258512   | -               | non-coding | yes    |
| 11_11219 | 7H  | 82.2   | 5.81         | AK368527   | -               | 2          | no     |
| 11_11406 | 6H  | 6.54   | 5.20         | AF166121   | Big1            | 3          | yes    |
| 11_11521 | 7H  | 127.74 | 4.21         | AK376764   | -               | 3          | yes    |
| 11_20114 | 4H  | 44.99  | 3.66         | AK360127   | -               | 3          | yes    |
| 11_20129 | 5H  | 42.41  | 2.90         | AK362176   | -               | non-coding | yes    |
| 11_20179 | 5H  | 42.41  | 2.85         | AK357883   | -               | non-coding | yes    |
| 11_20260 | 1H  | 42.42  | 7.95         | AK355367   | -               | 3          | yes    |
| 11_20306 | 5H  | 50.53  | 4.87         | AK365203   | -               | non-coding | yes    |
| 11_20332 | 5H  | 49.16  | 3.04         | WHE1A      | E1              | non-coding | yes    |
| 11_20347 | 5H  | 121.67 | 4.55         | AK359986   | -               | 3          | yes    |
| 11_20355 | 6H  | 120.69 | 3.68         | AK353922   | -               | non-coding | yes    |

|          |    |        |       |              |                         |   |     |
|----------|----|--------|-------|--------------|-------------------------|---|-----|
| 11_20383 | 1H | 134.96 | 5.76  | XM_003567791 | LOC100830416            | 3 | yes |
| 11_20390 | 2H | 72.99  | 10.41 | FN179383     | SBE2a                   | 3 | yes |
| 11_20438 | 2H | 69.05  | 4.78  | AK364463     | - non-coding            |   | yes |
| 11_20485 | 7H | 91.67  | 4.67  | -            | -                       | - | -   |
| 11_20498 | 2H | 116.5  | 2.96  | AK359654     | -                       | 3 | yes |
| 11_20527 | 3H | 142.17 | 5.48  | XM_003572099 | LOC100831350            | 3 | yes |
| 11_20620 | 6H | 78.52  | 12.93 | AK366751     | - non-coding            |   | yes |
| 11_20709 | 6H | 74.65  | 2.86  | AK363507     | -                       | 3 | yes |
| 11_20736 | 5H | 72.68  | 3.59  | AK372237     | -                       | 3 | yes |
| 11_20797 | 3H | 5.36   | 4.23  | AK375179     | - non-coding            |   | yes |
| 11_20889 | 6H | 86.54  | 3.18  | XM_002454244 | - non-coding            |   | yes |
| 11_20924 | 4H | 75.44  | 5.18  | AK376504     | -                       | 1 | no  |
| 11_20958 | 5H | 42.41  | 2.90  | AK372310     | -                       | 3 | yes |
| 11_20996 | 6H | 104.5  | 5.87  | AK360096     | -                       | 3 | yes |
| 11_21000 | 1H | 45.85  | 6.15  | AK370060     | -                       | 3 | yes |
| 11_21040 | 5H | 42.41  | 2.81  | AK370183     | - non-coding            |   | yes |
| 11_21181 | 2H | 155.68 | 6.75  | AK354575     | -                       | 3 | yes |
| 11_21193 | 1H | 42.42  | 7.31  | AK363338     | - non-coding            |   | yes |
| 11_21201 | 7H | 98.95  | 10.97 | -            | -                       | - | -   |
| 11_21399 | 2H | 72.99  | 8.83  | AK357878     | -                       | 1 | no  |
| 11_21494 | 7H | 81.78  | 3.46  | -            | -                       | - | -   |
| 12_10053 | 4H | 76.31  | 6.89  | AK370758     | -                       | 3 | yes |
| 12_10063 | 4H | 44.99  | 3.28  | AK360127     | - non-coding            |   | yes |
| 12_10089 | 7H | 91.12  | 3.90  | -            | -                       | - | -   |
| 12_10154 | 2H | 69.05  | 3.05  | AK355324     | - non-coding            |   | yes |
| 12_10159 | 1H | 42.42  | 2.78  | FN555319     | pdil4-1                 | 1 | no  |
| 12_10300 | 1H | 42.42  | 4.35  | EU131177     | PR-17c non-coding       |   | yes |
| 12_10313 | 0  | 0      | 4.12  | NM_001061695 | Os05g0311000            | - | -   |
| 12_10392 | 6H | 72.17  | 3.45  | AK361836     | -                       | 3 | yes |
| 12_10657 | 7H | 61.67  | 5.82  | AK366264     | -                       | 3 | yes |
| 12_10717 | 2H | 82.98  | 6.74  | -            | -                       | - | -   |
| 12_10810 | 4H | 37.88  | 3.63  | AK366265     | - non-coding            |   | yes |
| 12_10824 | 4H | 102.93 | 2.92  | XM_003577507 | LOC100843401 non-coding |   | yes |
| 12_10938 | 1H | 44.59  | 5.96  | AK359548     | -                       | 1 | no  |
| 12_11078 | 0  | 0      | 2.81  | AK372406     | - non-coding            |   | yes |
| 12_11151 | 5H | 51.51  | 5.38  | AK354730     | -                       | 3 | yes |
| 12_11271 | 1H | 136.7  | 6.00  | -            | -                       | - | -   |
| 12_11324 | 2H | 72.99  | 23.02 | AK356277     | - non-coding            |   | yes |
| 12_11357 | 1H | 30.15  | 7.86  | AK357047     | -                       | 1 | no  |

|          |    |        |       |               |              |            |     |
|----------|----|--------|-------|---------------|--------------|------------|-----|
| 12_11368 | 2H | 160.46 | 4.06  | AK360506      | -            | non-coding | yes |
| 12_11468 | 0  | 0      | 3.13  | AK359839      | -            | non-coding | yes |
| 12_20235 | 2H | 61.49  | 6.27  | AK376421      | -            | non-coding | yes |
| 12_20424 | 0  | 0      | 4.52  | AK373140      | -            | non-coding | yes |
| 12_20649 | 0  | 0      | 3.53  | -             | -            | -          | -   |
| 12_20760 | 4H | 138.7  | 5.50  | -             | -            | -          | -   |
| 12_20793 | 2H | 103.13 | 3.97  | AK371934      | -            | 2          | no  |
| 12_20981 | 5H | 51.51  | 4.73  | AK370568      | -            | 3          | yes |
| 12_21003 | 0  | 0      | 3.04  | -             | -            | -          | -   |
| 12_21131 | 1H | 59.99  | 3.29  | AK362065      | -            | 3          | yes |
| 12_21462 | 5H | 143.29 | 2.83  | AF109194      | -            | non-coding | yes |
| 12_30005 | 3H | 77.37  | 2.98  | -             | -            | -          | -   |
| 12_30060 | 4H | 62.81  | 10.00 | AK365085      | -            | non-coding | yes |
| 12_30170 | 3H | 92.73  | 2.95  | AK353673      | -            | 3          | yes |
| 12_30204 | 1H | 89.77  | 3.69  | AK356336      | -            | 3          | yes |
| 12_30226 | 4H | 89.36  | 8.78  | -             | -            | -          | -   |
| 12_30242 | 7H | 30.69  | 3.15  | XM_003580160  | LOC100839055 | 1          | yes |
| 12_30250 | 3H | 106.67 | 4.57  | AK356601      | -            | non-coding | yes |
| 12_30275 | 2H | 72.99  | 3.23  | -             | -            | -          | -   |
| 12_30342 | 3H | 114.36 | 3.00  | -             | -            | -          | -   |
| 12_30389 | 7H | 81.78  | 3.29  | FN179370      | AGP-S1a      | 3          | yes |
| 12_30403 | 1H | 128.04 | 6.73  | -             | -            | -          | -   |
| 12_30404 | 1H | 42.42  | 10.32 | AK355367      | -            | 3          | yes |
| 12_30438 | 1H | 42.42  | 2.78  | AK376647      | -            | 3          | yes |
| 12_30475 | 7H | 82.41  | 23.08 | AK372209      | -            | non-coding | yes |
| 12_30491 | 2H | 49.5   | 11.08 | -             | -            | -          | -   |
| 12_30494 | 5H | 171.58 | 8.49  | JX046065      | ERS1a        | 3          | yes |
| 12_30504 | 5H | 173.5  | 4.08  | -             | -            | -          | -   |
| 12_30528 | 7H | 42.26  | 9.06  | -             | -            | -          | -   |
| 12_30574 | 7H | 82.41  | 4.07  | AK370386      | -            | 3          | yes |
| 12_30581 | 7H | 79.08  | 7.89  | AK356791      | -            | 3          | yes |
| 12_30651 | 6H | 7.87   | 4.28  | AK358128      | -            | non-coding | yes |
| 12_30674 | 2H | 85.52  | 2.89  | AK369978      | -            | non-coding | yes |
| 12_30768 | 5H | 42.41  | 2.81  | AK371364      | -            | non-coding | yes |
| 12_30781 | 2H | 9.12   | 3.22  | AK361785      | -            | non-coding | yes |
| 12_30976 | 5H | 1.91   | 3.40  | SEG_AY643842S | -            | non-coding | yes |
| 12_30988 | 4H | 111.81 | 3.04  | Y14573        | Mlo          | non-coding | yes |
| 12_30993 | 4H | 49.43  | 4.61  | XM_003577562  | LOC100833831 | 3          | yes |
| 12_31032 | 5H | 52.86  | 8.13  | AF326715      | adh3         | non-coding | yes |

|          |    |        |      |          |      |            |     |
|----------|----|--------|------|----------|------|------------|-----|
| 12_31035 | 5H | 52.86  | 9.13 | DQ195967 | adh3 | non-coding | yes |
| 12_31064 | 5H | 51.51  | 3.07 | AK365941 | -    | 3          | yes |
| 12_31081 | 1H | 143.2  | 3.39 | AK356376 | -    | 3          | yes |
| 12_31183 | 5H | 50.53  | 3.78 | AK362952 | -    | non-coding | yes |
| 12_31207 | 0  | 0      | 5.27 | AK356841 | -    | 3          | yes |
| 12_31234 | 5H | 141.88 | 2.78 | AK358248 | -    | non-coding | yes |
| 12_31270 | 0  | 0      | 3.11 | AK361597 | -    | non-coding | yes |
| 12_31377 | 1H | 128.04 | 6.56 | AK374439 | -    | 3          | yes |
| 12_31424 | 2H | 101.72 | 3.59 | AK375713 | -    | non-coding | yes |
| 12_31486 | 4H | 6.86   | 9.19 | -        | -    | -          | -   |

---

**Table S8 SNPs with SPA score above 95<sup>th</sup> percentile genome-wide, including genetic position, GenBank ID, gene short name, in non-coding or coding region (1<sup>st</sup>, 2<sup>nd</sup> or 3<sup>rd</sup> positions), and silent or replacement information**

| SNP Name | Chr | cM     | SPA score | GenBank ID | Gene Short Name | Position   | Silent |
|----------|-----|--------|-----------|------------|-----------------|------------|--------|
| 11_10006 | 1H  | 76.92  | 2.83      | AM502852   | tub4            | 3          | yes    |
| 11_10017 | 2H  | 81.31  | 2.96      | AK353943   | -               | 3          | yes    |
| 11_10056 | 7H  | 33.49  | 3.78      | AK364330   | -               | non-coding | yes    |
| 11_10104 | 5H  | 141.88 | 2.86      | -          | -               | -          | -      |
| 11_10169 | 7H  | 106.8  | 3.34      | AK367663   | -               | non-coding | yes    |
| 11_10196 | 2H  | 89.68  | 3.14      | AK362580   | -               | 3          | yes    |
| 11_10253 | 3H  | 102.66 | 2.84      | -          | -               | -          | -      |
| 11_10477 | 5H  | 107.19 | 3.19      | AK354978   | -               | 3          | yes    |
| 11_10518 | 5H  | 88.05  | 2.93      | AK372467   | -               | 1          | no     |
| 11_10536 | 5H  | 155.23 | 3.25      | AK354787   | -               | 3          | yes    |
| 11_10547 | 7H  | 160.97 | 3.48      | AK357875   | -               | 3          | yes    |
| 11_10557 | 5H  | 144.6  | 2.95      | AK371672   | -               | 3          | yes    |
| 11_10580 | 5H  | 29.9   | 3.02      | AK372891   | -               | non-coding | yes    |
| 11_10614 | 4H  | 111.81 | 3.80      | AK373775   | -               | 3          | yes    |
| 11_10619 | 2H  | 95.58  | 3.00      | AK373516   | -               | non-coding | yes    |
| 11_10653 | 3H  | 69.4   | 3.67      | AK356876   | -               | 2          | no     |
| 11_10668 | 4H  | 50.22  | 3.04      | -          | -               | -          | -      |
| 11_10685 | 2H  | 72.99  | 4.37      | AK362284   | -               | 3          | yes    |
| 11_10687 | 7H  | 139.9  | 3.32      | AK366838   | -               | 3          | yes    |
| 11_10939 | 6H  | 37.29  | 3.46      | AK371919   | -               | non-coding | yes    |
| 11_11012 | 7H  | 149.31 | 2.93      | AK360584   | -               | 1          | no     |
| 11_11111 | 6H  | 139.09 | 2.80      | AK366470   | -               | non-coding | yes    |
| 11_11243 | 7H  | 121.36 | 2.79      | -          | -               | -          | -      |
| 11_11354 | 2H  | 68.07  | 2.76      | AK371682   | -               | non-coding | yes    |
| 11_11432 | 5H  | 38.78  | 3.59      | -          | -               | -          | -      |
| 11_20018 | 5H  | 93.66  | 3.32      | AK376008   | -               | non-coding | yes    |
| 11_20029 | 6H  | 133.25 | 3.16      | AK354118   | -               | 1          | no     |
| 11_20086 | 2H  | 110.93 | 2.96      | AK358640   | -               | non-coding | yes    |
| 11_20109 | 4H  | 29.34  | 2.97      | AK360657   | -               | 3          | yes    |
| 11_20133 | 1H  | 132.16 | 2.74      | AK361091   | -               | non-coding | yes    |
| 11_20145 | 4H  | 1.2    | 2.76      | -          | -               | -          | -      |
| 11_20260 | 1H  | 42.42  | 2.73      | AK355367   | -               | 3          | yes    |
| 11_20390 | 2H  | 72.99  | 3.47      | FN179383   | SBE2a           | 3          | yes    |
| 11_20485 | 7H  | 91.67  | 2.97      | -          | -               | -          | -      |
| 11_20620 | 6H  | 78.52  | 2.78      | AK366751   | -               | non-coding | yes    |
| 11_21005 | 2H  | 54.92  | 2.76      | -          | -               | -          | -      |

|          |    |        |      |              |              |            |     |
|----------|----|--------|------|--------------|--------------|------------|-----|
| 11_21121 | 5H | 58.65  | 2.93 | AK356836     | -            | 3          | yes |
| 11_21192 | 1H | 89.77  | 4.03 | AK357712     | -            | non-coding | yes |
| 11_21244 | 5H | 51.51  | 4.22 | AK359027     | -            | 3          | yes |
| 11_21325 | 5H | 123.12 | 3.06 | AK362100     | -            | non-coding | yes |
| 11_21340 | 2H | 116.5  | 2.85 | -            | -            | -          | -   |
| 11_21399 | 2H | 72.99  | 4.94 | AK357878     | -            | 1          | no  |
| 11_21406 | 2H | 142.67 | 3.26 | AK370573     | -            | 2          | no  |
| 11_21447 | 5H | 41.45  | 3.46 | AK364513     | -            | 2          | no  |
| 11_21452 | 5H | 155.23 | 2.88 | AK372156     | -            | 1          | no  |
| 11_21502 | 3H | 76.43  | 3.01 | AK356987     | -            | 3          | yes |
| 12_10014 | 3H | 173.43 | 3.22 | -            | -            | -          | -   |
| 12_10089 | 7H | 91.12  | 2.76 | -            | -            | -          | -   |
| 12_10154 | 2H | 69.05  | 4.02 | AK355324     | -            | non-coding | yes |
| 12_10170 | 4H | 88.7   | 4.17 | AK373474     | -            | non-coding | yes |
| 12_10199 | 6H | 49.67  | 3.54 | AK376992     | -            | non-coding | yes |
| 12_10203 | 5H | 59.72  | 3.93 | AK356265     | -            | 3          | yes |
| 12_10219 | 0  | 0      | 2.91 | AY039003     | Xantha-f     | 3          | yes |
| 12_10264 | 5H | 47.04  | 3.42 | WHITE1A      | E1           | non-coding | yes |
| 12_10284 | 0  | 0      | 3.50 | XM_003564030 | LOC100843138 | 3          | yes |
| 12_10347 | 4H | 43.72  | 2.81 | AK362515     | -            | non-coding | yes |
| 12_10392 | 6H | 72.17  | 3.20 | AK361836     | -            | 3          | yes |
| 12_10581 | 7H | 82.41  | 3.14 | AK375754     | -            | 3          | yes |
| 12_10725 | 5H | 52.86  | 2.95 | AK366248     | -            | non-coding | yes |
| 12_10810 | 4H | 37.88  | 3.93 | AK366265     | -            | non-coding | yes |
| 12_10824 | 4H | 102.93 | 3.58 | XM_003577507 | LOC100843401 | non-coding | yes |
| 12_11151 | 5H | 51.51  | 4.30 | AK354730     | -            | 3          | yes |
| 12_11271 | 1H | 136.7  | 2.77 | -            | -            | -          | -   |
| 12_11288 | 2H | 67.08  | 3.93 | AK366035     | -            | 3          | no  |
| 12_11310 | 3H | 13.13  | 3.29 | AK372013     | -            | 3          | yes |
| 12_11316 | 2H | 73.89  | 3.35 | AK354712     | -            | non-coding | yes |
| 12_11324 | 2H | 72.99  | 5.54 | AK356277     | -            | non-coding | yes |
| 12_11408 | 0  | 0      | 2.73 | -            | -            | -          | -   |
| 12_11444 | 1H | 54.54  | 2.76 | AJ965495     | mcb1         | non-coding | yes |
| 12_11498 | 1H | 34.45  | 3.24 | -            | -            | -          | -   |
| 12_20278 | 5H | 59.72  | 3.93 | AK356265     | -            | 1          | no  |
| 12_20413 | 3H | 135.43 | 2.80 | AK356460     | -            | 3          | yes |
| 12_20649 | 0  | 0      | 2.80 | -            | -            | -          | -   |
| 12_20685 | 7H | 94.34  | 3.24 | -            | -            | -          | -   |
| 12_20981 | 5H | 51.51  | 4.22 | AK370568     | -            | 3          | yes |

|          |    |        |      |              |              |            |     |
|----------|----|--------|------|--------------|--------------|------------|-----|
| 12_21003 | 0  | 0      | 3.57 | -            | -            | -          | -   |
| 12_21117 | 4H | 0      | 4.62 | AK359776     | -            | non-coding | yes |
| 12_21131 | 1H | 59.99  | 2.90 | AK362065     | -            | 3          | yes |
| 12_21234 | 7H | 68.89  | 3.77 | AK356095     | -            | 2          | no  |
| 12_21319 | 7H | 82.41  | 2.92 | XM_003573274 | LOC100845308 | non-coding | yes |
| 12_30046 | 4H | 105.83 | 2.94 | -            | -            | -          | -   |
| 12_30068 | 2H | 67.08  | 3.93 | AK364966     | -            | 3          | yes |
| 12_30226 | 4H | 89.36  | 2.89 | -            | -            | -          | -   |
| 12_30250 | 3H | 106.67 | 3.75 | AK356601     | -            | non-coding | yes |
| 12_30344 | 7H | 77.02  | 2.91 | AK359310     | -            | non-coding | yes |
| 12_30404 | 1H | 42.42  | 2.79 | AK355367     | -            | 3          | yes |
| 12_30524 | 5H | 116.66 | 3.39 | AK366243     | -            | non-coding | yes |
| 12_30577 | 5H | 177.9  | 2.73 | -            | -            | -          | -   |
| 12_30581 | 7H | 79.08  | 2.89 | AK356791     | -            | 3          | yes |
| 12_30637 | 6H | 72.17  | 4.10 | AK368823     | -            | non-coding | yes |
| 12_30640 | 3H | 108.7  | 2.78 | AK369817     | -            | non-coding | yes |
| 12_30644 | 5H | 50.53  | 2.83 | AK374038     | -            | 3          | yes |
| 12_30724 | 2H | 72.99  | 2.83 | AK368064     | -            | 3          | yes |
| 12_30737 | 3H | 59.83  | 3.50 | AK361759     | -            | 3          | yes |
| 12_30745 | 5H | 55.44  | 3.06 | AK366468     | -            | 3          | yes |
| 12_30834 | 5H | 88.05  | 3.20 | AK372467     | -            | non-coding | yes |
| 12_30850 | 5H | 98.2   | 3.28 | DQ480160     | CBF4B        | non-coding | yes |
| 12_30956 | 6H | 142.2  | 3.20 | -            | -            | -          | -   |
| 12_30988 | 4H | 111.81 | 3.36 | Y14573       | Mlo          | non-coding | yes |
| 12_31017 | 3H | 67.86  | 3.28 | AK356796     | -            | non-coding | yes |
| 12_31021 | 2H | 82.44  | 2.85 | AF112963     | Cht2         | non-coding | yes |
| 12_31023 | 5H | 4.15   | 2.80 | AK355143     | -            | non-coding | yes |
| 12_31032 | 5H | 52.86  | 3.81 | AF326715     | adh3         | non-coding | yes |
| 12_31035 | 5H | 52.86  | 3.80 | DQ195967     | adh3         | non-coding | yes |
| 12_31043 | 6H | 112.39 | 2.77 | AY349220     | Dhn5         | 3          | yes |
| 12_31062 | 5H | 51.51  | 3.86 | AK365941     | -            | 3          | yes |
| 12_31064 | 5H | 51.51  | 4.23 | AK365941     | -            | 3          | yes |
| 12_31081 | 1H | 143.2  | 3.60 | AK356376     | -            | 3          | yes |
| 12_31100 | 2H | 142.67 | 3.26 | AK370573     | -            | 2          | no  |
| 12_31179 | 1H | 61.39  | 2.79 | AY738115     | cbp1         | 3          | yes |
| 12_31189 | 2H | 67.08  | 2.76 | AK364573     | -            | 3          | yes |
| 12_31202 | 0  | 0      | 2.73 | AK358464     | -            | non-coding | yes |
| 12_31246 | 4H | 92.41  | 3.24 | AK362249     | -            | non-coding | yes |
| 12_31411 | 0  | 0      | 2.81 | AK372597     | -            | 2          | no  |

|          |    |        |      |          |   |            |     |
|----------|----|--------|------|----------|---|------------|-----|
| 12_31486 | 4H | 6.86   | 3.75 | -        | - | -          | -   |
| 12_31511 | 0  | 0      | 3.01 | AK360621 | - | non-coding | yes |
| 12_31525 | 3H | 134.05 | 3.32 | AK364139 | - | 2          | no  |

---
