# Supplementary material for: Two Genomic Regions Contribute Disproportionately to Geographic Differentiation in Wild Barley
Source: PubMed Central journal article supplement (PMC4455769; doi:10.1534/g3.114.010561), 2014-04-22
Supplement: supp_g3.114.010561_FigureS1.pdf [file supp_g3.114.010561_FigureS1.pdf]

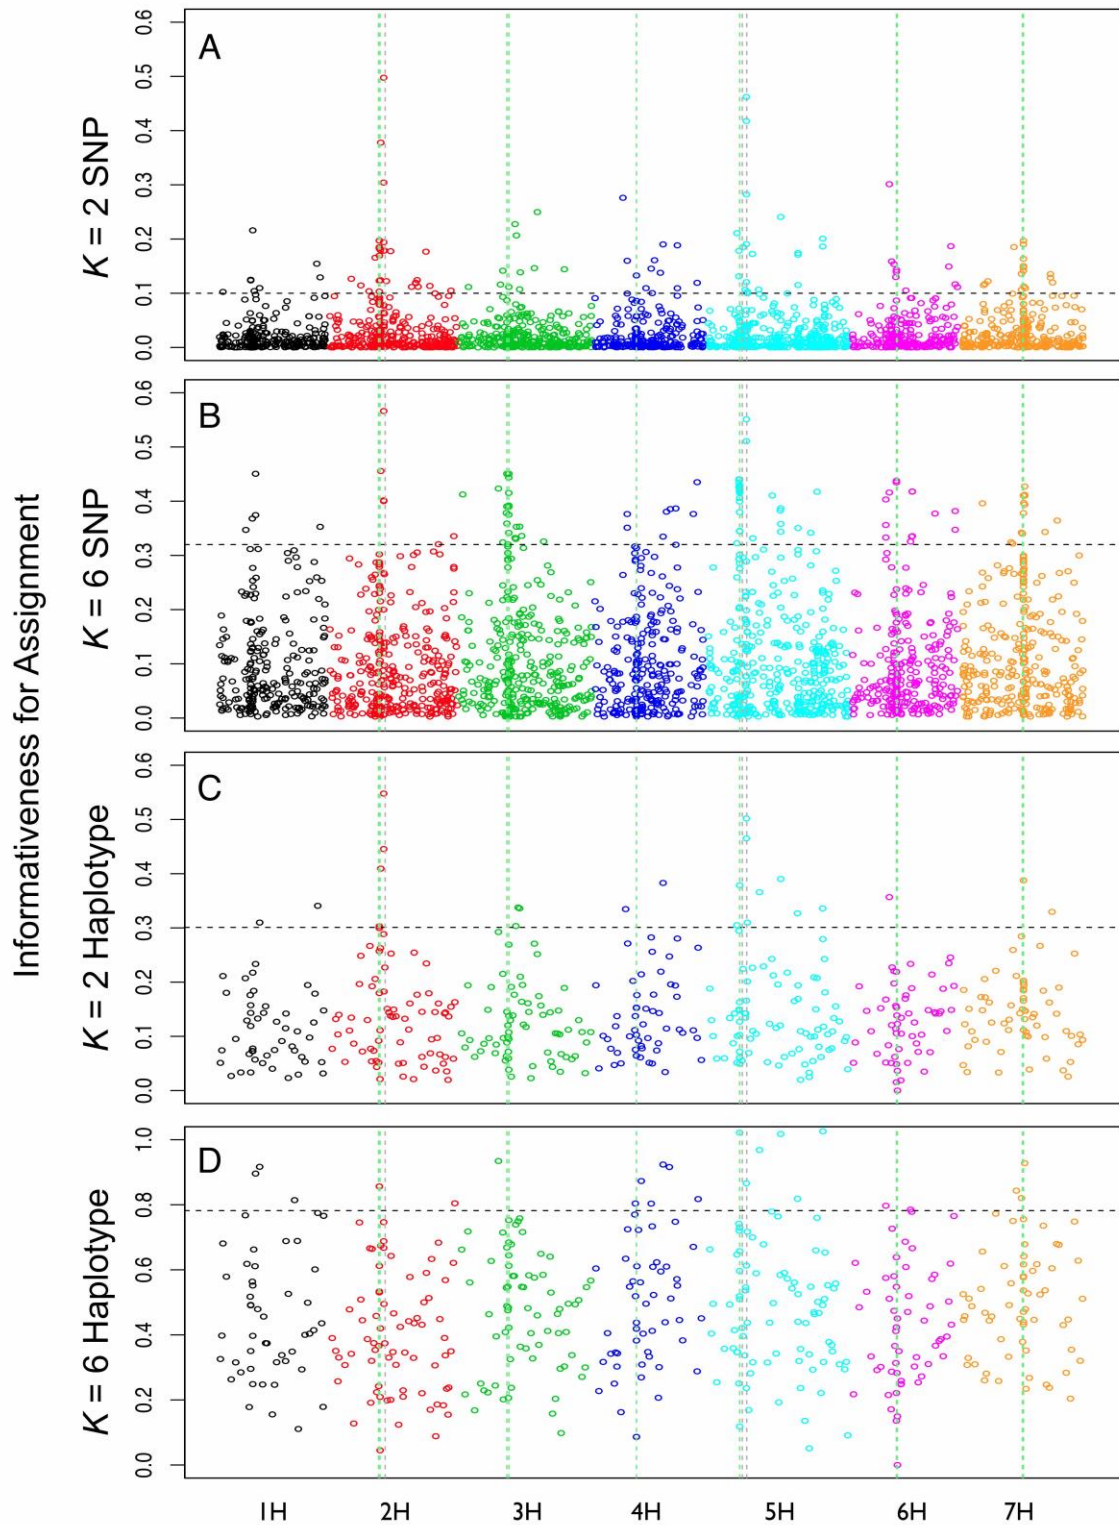

**Figure S1** The informativeness for assignment for all SNPs (A, B) and five-SNP haplotypes (C, D) genome-wide based on (A, C)  $K = 2$  and (B, D)  $K = 6$ . The horizontal dashed line is the 95th percentile. The grey vertical dashed lines delineate the two high  $F_{ST}$  regions based on comparison between the Eastern and Western populations. The green vertical dashed lines indicate the centromeric regions. Note the scale of y-axis in panel D.
