# Supplementary material for: Two Genomic Regions Contribute Disproportionately to Geographic Differentiation in Wild Barley
Source: PubMed Central journal article supplement (PMC4455769; doi:10.1534/g3.114.010561), 2014-04-22
Supplement: supp_g3.114.010561_FigureS4.pdf [file supp_g3.114.010561_FigureS4.pdf]

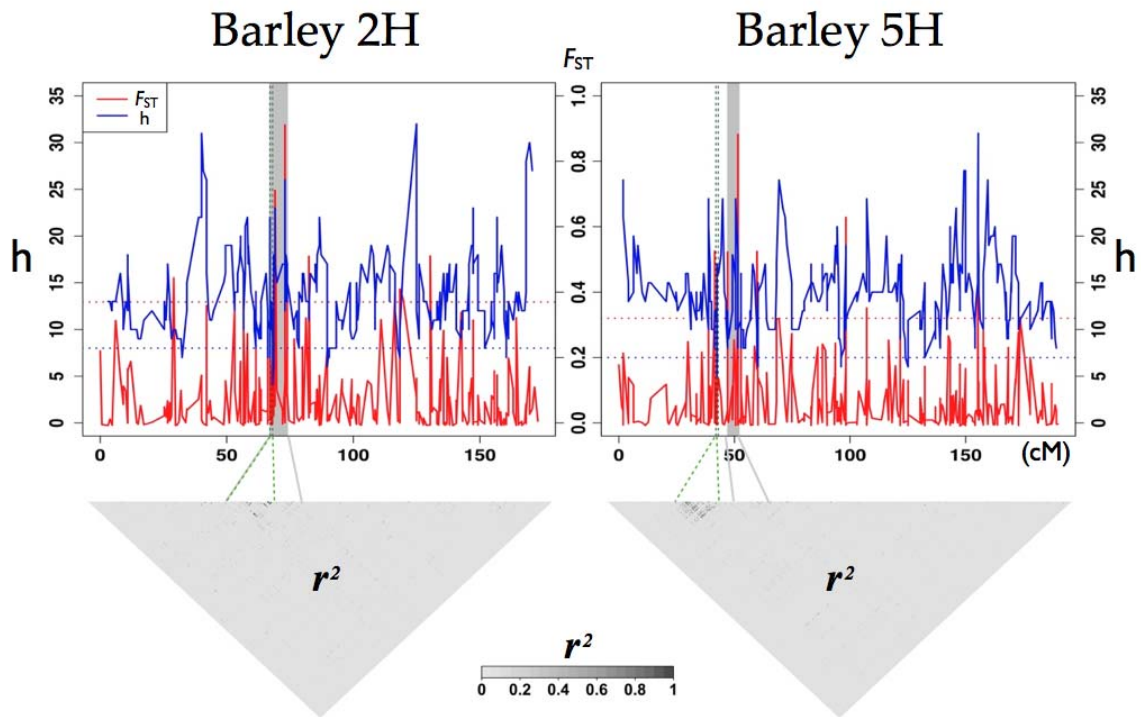

**Figure S4** Population genetic analysis of the two high  $F_{ST}$  regions. Top panel, haplotype number (blue curve) and  $F_{ST}$  between the Eastern and Western populations (red curve). The number of haplotypes present across linkage group 2H and 5H was calculated in overlapping 5-SNP windows with 1-SNP increments. The high  $F_{ST}$  regions are marked in grey and the centromeres by green dashed lines. Below, LD ( $r^2$ ) is plotted across 2H and 5H.
