# Supplementary material for: Two Genomic Regions Contribute Disproportionately to Geographic Differentiation in Wild Barley
Source: PubMed Central journal article supplement (PMC4455769; doi:10.1534/g3.114.010561), 2014-04-22
Supplement: supp_g3.114.010561_FigureS5.pdf [file supp_g3.114.010561_FigureS5.pdf]

# Environmental Variables

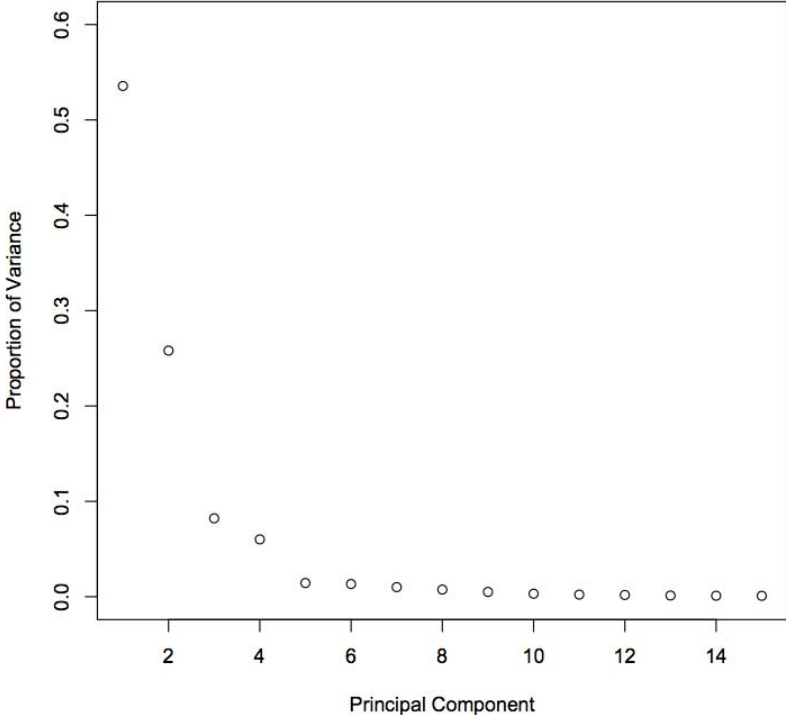

**Figure S5** The proportion of variance explained by each PC of environmental variables.
