# Supplementary material for: Two Genomic Regions Contribute Disproportionately to Geographic Differentiation in Wild Barley
Source: PubMed Central journal article supplement (PMC4455769; doi:10.1534/g3.114.010561), 2014-04-22
Supplement: supp_g3.114.010561_TableS1.pdf [file supp_g3.114.010561_TableS1.pdf]

**Table S1 284 wild barley accessions used in this study, including their latitude and longitude information**

| Accession | Latitude | Longitude |
|-----------|----------|-----------|
| WBDC001   | 36.22    | 36.7      |
| WBDC002   | 35.71    | 37.44     |
| WBDC004   | 35.97    | 36.54     |
| WBDC005   | 32.45    | 35.92     |
| WBDC006   | 32.3     | 36.17     |
| WBDC007   | 32.33    | 35.92     |
| WBDC008   | 32.67    | 35.62     |
| WBDC009   | 31.53    | 35.75     |
| WBDC010   | 36.67    | 65.73     |
| WBDC011   | 36       | 43.52     |
| WBDC012   | 36.28    | 64.82     |
| WBDC013   | 35.53    | 44.83     |
| WBDC014   | 35.75    | 69        |
| WBDC015   | 34.35    | 62.18     |
| WBDC017   | 32.74    | 35.82     |
| WBDC018   | 34.98    | 63.12     |
| WBDC019   | 36.75    | 45.72     |
| WBDC021   | 34.8     | 45.6      |
| WBDC022   | 39.78    | 30.52     |
| WBDC023   | 33.5     | 48.45     |
| WBDC024   | 31.28    | 48.72     |
| WBDC025   | 30.3     | 66.9      |
| WBDC026   | 37.65    | 69.1      |
| WBDC028   | 31.95    | 34.93     |
| WBDC029   | 31.58    | 34.62     |
| WBDC030   | 33.08    | 35.18     |
| WBDC031   | 32.75    | 35.08     |
| WBDC032   | 33       | 35.13     |
| WBDC033   | 31.27    | 35.22     |
| WBDC034   | 31.85    | 34.92     |
| WBDC035   | 31.43    | 34.59     |
| WBDC036   | 34.57    | 63        |
| WBDC037   | 32.98    | 35.5      |
| WBDC038   | 46.77    | 35.21     |
| WBDC039   | 32.03    | 35.83     |
| WBDC040   | 32.7     | 34.95     |
| WBDC041   | 31.67    | 34.57     |
| WBDC042   | 32.97    | 35.53     |
| WBDC043   | 32.98    | 35.58     |
| WBDC044   | 32.17    | 34.83     |
| WBDC046   | 32.48    | 35.9      |
| WBDC047   | 32.53    | 36.07     |
| WBDC048   | 37.25    | 44.48     |
| WBDC049   | 37.25    | 44.48     |
| WBDC051   | 34.76    | 39.03     |
| WBDC052   | 32.32    | 36.02     |

|         |       |       |
|---------|-------|-------|
| WBDC054 | 34.57 | 38.36 |
| WBDC055 | 35.61 | 35.82 |
| WBDC056 | 36.72 | 37.12 |
| WBDC058 | 34.99 | 34.02 |
| WBDC059 | 34.98 | 34.05 |
| WBDC060 | 31.35 | 27.17 |
| WBDC061 | 36.16 | 36.58 |
| WBDC062 | 36.38 | 36.84 |
| WBDC063 | 36.72 | 36.64 |
| WBDC064 | 35.8  | 36.24 |
| WBDC066 | 33.78 | 36.4  |
| WBDC067 | 33.7  | 36.38 |
| WBDC068 | 32.82 | 36.72 |
| WBDC070 | 35.61 | 35.82 |
| WBDC072 | 32.78 | 21.63 |
| WBDC073 | 32.08 | 21.87 |
| WBDC074 | 32.8  | 22.05 |
| WBDC075 | 32.7  | 21.92 |
| WBDC078 | 36.77 | 40.86 |
| WBDC079 | 32.25 | 35.88 |
| WBDC080 | 32.53 | 35.78 |
| WBDC081 | 32.48 | 35.65 |
| WBDC083 | 32.17 | 35.92 |
| WBDC085 | 31.98 | 35.65 |
| WBDC089 | 31.83 | 35.8  |
| WBDC095 | 31.18 | 35.62 |
| WBDC097 | 31.28 | 35.83 |
| WBDC100 | 30.77 | 35.62 |
| WBDC101 | 30.7  | 35.57 |
| WBDC102 | 30.58 | 35.57 |
| WBDC103 | 30.2  | 35.47 |
| WBDC104 | 31.18 | 35.62 |
| WBDC105 | 32.65 | 35.83 |
| WBDC106 | 34.94 | 36.74 |
| WBDC107 | 34.75 | 36.73 |
| WBDC108 | 33.94 | 36.71 |
| WBDC109 | 32.77 | 36.72 |
| WBDC110 | 32.78 | 36.79 |
| WBDC111 | 33.84 | 36.54 |
| WBDC112 | 33.98 | 36.59 |
| WBDC113 | 37.92 | 58.17 |
| WBDC115 | 38.33 | 55.87 |
| WBDC116 | 38.32 | 56.38 |
| WBDC117 | 38.17 | 56.05 |
| WBDC119 | 40.08 | 67.58 |
| WBDC120 | 39.47 | 67.5  |
| WBDC121 | 29.72 | 51.78 |
| WBDC122 | 32.87 | 48.17 |
| WBDC123 | 36.42 | 58.47 |

|         |       |       |
|---------|-------|-------|
| WBDC124 | 35.02 | 46.45 |
| WBDC125 | 38.8  | 66.47 |
| WBDC126 | 33.45 | 35.32 |
| WBDC127 | 32.94 | 36.73 |
| WBDC128 | 33.84 | 36.17 |
| WBDC129 | 32.81 | 36.42 |
| WBDC130 | 32.83 | 36.18 |
| WBDC131 | 33.01 | 36.04 |
| WBDC132 | 33.47 | 35.87 |
| WBDC133 | 33.62 | 35.82 |
| WBDC134 | 33.62 | 35.77 |
| WBDC135 | 33.52 | 35.72 |
| WBDC136 | 33.52 | 35.77 |
| WBDC137 | 33.45 | 35.82 |
| WBDC138 | 33.42 | 35.76 |
| WBDC139 | 33.93 | 36.1  |
| WBDC140 | 34.2  | 36.08 |
| WBDC141 | 34.13 | 36.03 |
| WBDC142 | 34.02 | 36.08 |
| WBDC143 | 33.57 | 35.9  |
| WBDC145 | 33.8  | 36.02 |
| WBDC146 | 36.75 | 45.7  |
| WBDC147 | 37.5  | 45.17 |
| WBDC148 | 37.07 | 45.47 |
| WBDC149 | 38.08 | 45    |
| WBDC150 | 38.5  | 47.2  |
| WBDC151 | 36.52 | 36.95 |
| WBDC152 | 35.5  | 51.25 |
| WBDC155 | 36.33 | 42.17 |
| WBDC156 | 36.42 | 41.65 |
| WBDC157 | 36.38 | 43.42 |
| WBDC158 | 35.37 | 43.2  |
| WBDC159 | 32.68 | 36.79 |
| WBDC160 | 32.96 | 36.6  |
| WBDC161 | 36.65 | 37.58 |
| WBDC164 | 37.01 | 41.64 |
| WBDC165 | 37.29 | 42.21 |
| WBDC167 | 36.4  | 40.36 |
| WBDC168 | 33.57 | 35.72 |
| WBDC169 | 33.5  | 35.78 |
| WBDC170 | 33.63 | 35.95 |
| WBDC171 | 33.58 | 35.85 |
| WBDC174 | 36.27 | 47.77 |
| WBDC175 | 36.27 | 47.77 |
| WBDC177 | 36.35 | 43.13 |
| WBDC178 | 36.08 | 43.28 |
| WBDC179 | 32.5  | 20.9  |
| WBDC180 | 31.83 | 24.23 |
| WBDC181 | 32.02 | 36.02 |

|         |       |       |
|---------|-------|-------|
| WBDC183 | 32.63 | 35.72 |
| WBDC184 | 32.37 | 21.17 |
| WBDC185 | 32.77 | 21.72 |
| WBDC186 | 36.88 | 37.35 |
| WBDC187 | 36.69 | 37.46 |
| WBDC188 | 36.88 | 37.52 |
| WBDC189 | 36.76 | 37.63 |
| WBDC191 | 36.84 | 37.72 |
| WBDC192 | 37.04 | 37.61 |
| WBDC193 | 37.32 | 37.47 |
| WBDC194 | 36.97 | 37.19 |
| WBDC195 | 36.81 | 37.22 |
| WBDC196 | 36.99 | 36.93 |
| WBDC197 | 36.48 | 37.77 |
| WBDC198 | 34.82 | 36.47 |
| WBDC199 | 34.91 | 36.64 |
| WBDC200 | 34.94 | 36.66 |
| WBDC201 | 35.56 | 36.89 |
| WBDC202 | 35.6  | 36.55 |
| WBDC203 | 35.63 | 36.45 |
| WBDC204 | 38.58 | 57.12 |
| WBDC205 | 42.05 | 48.27 |
| WBDC206 | 32.55 | 36.6  |
| WBDC207 | 40.34 | 71.18 |
| WBDC208 | 41.61 | 69.91 |
| WBDC209 | 40.13 | 68.4  |
| WBDC210 | 39.93 | 67.68 |
| WBDC212 | 40.01 | 67.09 |
| WBDC213 | 39.55 | 66.56 |
| WBDC214 | 39.4  | 67.02 |
| WBDC215 | 38.28 | 56.29 |
| WBDC216 | 38.73 | 56.85 |
| WBDC217 | 40.2  | 44.53 |
| WBDC218 | 43.06 | 73.66 |
| WBDC220 | 42.42 | 69.7  |
| WBDC221 | 40.13 | 69.33 |
| WBDC222 | 40.13 | 69.33 |
| WBDC223 | 39.97 | 69    |
| WBDC225 | 40.12 | 69.2  |
| WBDC228 | 40.49 | 49.19 |
| WBDC229 | 40.53 | 48.89 |
| WBDC230 | 40.61 | 48.88 |
| WBDC231 | 40.71 | 48.8  |
| WBDC232 | 40.7  | 48.63 |
| WBDC233 | 35.93 | 68.7  |
| WBDC234 | 35.15 | 33.88 |
| WBDC236 | 31.6  | 35.62 |
| WBDC237 | 31.53 | 35.62 |
| WBDC238 | 31.55 | 35.85 |

|         |       |       |
|---------|-------|-------|
| WBDC240 | 31.88 | 35.94 |
| WBDC241 | 31.78 | 36.22 |
| WBDC242 | 32.12 | 35.87 |
| WBDC243 | 32.03 | 35.67 |
| WBDC244 | 32.08 | 35.71 |
| WBDC245 | 32.17 | 35.87 |
| WBDC246 | 32.68 | 35.75 |
| WBDC247 | 32.37 | 35.7  |
| WBDC248 | 32.53 | 35.85 |
| WBDC250 | 32.58 | 35.93 |
| WBDC252 | 32.28 | 35.68 |
| WBDC253 | 32.35 | 35.82 |
| WBDC254 | 32.62 | 35.7  |
| WBDC255 | 32.35 | 35.67 |
| WBDC256 | 32.33 | 35.63 |
| WBDC257 | 31.18 | 35.7  |
| WBDC258 | 31.28 | 35.75 |
| WBDC260 | 30.5  | 35.5  |
| WBDC261 | 30.52 | 35.53 |
| WBDC262 | 30.3  | 35.48 |
| WBDC263 | 30.38 | 35.47 |
| WBDC265 | 30.93 | 35.67 |
| WBDC266 | 30.88 | 35.67 |
| WBDC268 | 31.75 | 36.76 |
| WBDC269 | 33.42 | 35.87 |
| WBDC270 | 31.68 | 34.87 |
| WBDC271 | 31.43 | 34.48 |
| WBDC274 | 30.87 | 34.77 |
| WBDC275 | 31.58 | 34.55 |
| WBDC277 | 32.15 | 34.93 |
| WBDC278 | 31.83 | 34.77 |
| WBDC279 | 31.82 | 34.78 |
| WBDC280 | 32.02 | 34.83 |
| WBDC281 | 33.03 | 35.58 |
| WBDC282 | 32.68 | 35.22 |
| WBDC284 | 32.67 | 35.6  |
| WBDC285 | 32.98 | 35.45 |
| WBDC286 | 32.97 | 35.47 |
| WBDC287 | 32.5  | 35.5  |
| WBDC288 | 32.98 | 35.42 |
| WBDC289 | 32.52 | 35.48 |
| WBDC290 | 31.67 | 34.93 |
| WBDC291 | 31.72 | 34.92 |
| WBDC292 | 31.8  | 35.02 |
| WBDC293 | 31.8  | 35.17 |
| WBDC294 | 31.75 | 34.98 |
| WBDC295 | 37.08 | 42.07 |
| WBDC296 | 37.06 | 41.56 |
| WBDC297 | 37.06 | 41.75 |

|         |       |       |
|---------|-------|-------|
| WBDC298 | 37.08 | 41.09 |
| WBDC299 | 36.66 | 36.71 |
| WBDC300 | 36.37 | 36.86 |
| WBDC302 | 33.37 | 35.88 |
| WBDC303 | 33.74 | 36.11 |
| WBDC304 | 33.64 | 35.96 |
| WBDC305 | 33.66 | 36    |
| WBDC306 | 33.73 | 36.13 |
| WBDC307 | 33.2  | 36.07 |
| WBDC308 | 32.6  | 36.38 |
| WBDC309 | 35.03 | 37.01 |
| WBDC310 | 34.54 | 36.92 |
| WBDC312 | 34.47 | 36.76 |
| WBDC315 | 34.94 | 36.85 |
| WBDC316 | 36.23 | 36.55 |
| WBDC317 | 35.52 | 38.76 |
| WBDC318 | 32.6  | 36.74 |
| WBDC319 | 32.49 | 36.68 |
| WBDC320 | 32.42 | 36.62 |
| WBDC323 | 37.9  | 58.55 |
| WBDC324 | 35.83 | 61.46 |
| WBDC326 | 37.72 | 58.6  |
| WBDC329 | 38.18 | 55.6  |
| WBDC330 | 38.77 | 56.29 |
| WBDC331 | 39.24 | 56.11 |
| WBDC332 | 38.43 | 56.42 |
| WBDC333 | 38.41 | 56.49 |
| WBDC334 | 38.27 | 56.31 |
| WBDC335 | 39.25 | 55.62 |
| WBDC336 | 38.42 | 56.68 |
| WBDC337 | 37.23 | 37.52 |
| WBDC338 | 37.27 | 37.54 |
| WBDC340 | 37.25 | 37.33 |
| WBDC341 | 36.95 | 36.93 |
| WBDC342 | 36.97 | 36.9  |
| WBDC343 | 36.87 | 36.95 |
| WBDC345 | 38.95 | 66.83 |
| WBDC346 | 39.92 | 66.37 |
| WBDC347 | 37.8  | 67    |
| WBDC348 | 32.44 | 35    |
| WBDC349 | 32.14 | 35.14 |
| WBDC355 | 40.31 | 48.81 |

---
