# Supplementary material for: Two Genomic Regions Contribute Disproportionately to Geographic Differentiation in Wild Barley
Source: PubMed Central journal article supplement (PMC4455769; doi:10.1534/g3.114.010561), 2014-04-22
Supplement: supp_g3.114.010561_TableS2.pdf [file supp_g3.114.010561_TableS2.pdf]

**Table S2 The name, repeat length, repeat unit length, total size and observed heterozygosity of the 29 microsatellites used in this study**

| Microsatellite | # Repeat      | Repeat unit length | Total size (bp) | Observed Heterozygosity |
|----------------|---------------|--------------------|-----------------|-------------------------|
| Bmag905        | 14            | 2                  | 178-228         | 0.01                    |
| Bmag006        | 17            | 2                  | 105-223         | 0.10                    |
| Bmac129        | 28            | 2                  | 132-204         | 0.00                    |
| Bmac67         | 18            | 2                  | 130-262         | 0.04                    |
| Bmag749        | 11            | 2                  | 93-199          | 0.01                    |
| Bmac134        | 28            | 2                  | 117-189         | 0.01                    |
| Bmac156        | (AC)22(AT)5   | 2                  | 103-199         | 0.01                    |
| Bmac213        | 23            | 2                  | 131-213         | 0.09                    |
| Bmac316        | 19            | 2                  | 138-234         | 0.01                    |
| Bmag369        | 16            | 2                  | 196-216         | 0.00                    |
| Bmag718        | (GA)18(AG)6   | 2                  | 165-217         | 0.02                    |
| Bmag877        | 15            | 2                  | 153-289         | 0.04                    |
| EBmac603       | 10            | 2                  | 155-257         | 0.09                    |
| HVM06          | 9             | 2                  | 118-202         | 0.23                    |
| HVMLOH1A       | 6             | 2                  | 147-203         | 0.00                    |
| GMS1           | (CT)7TTT(CT)2 | 2                  | 123-161         | 0.18                    |
| Bmag0496       | 20            | 2                  | 139-287         | 0.03                    |
| HVHVA1         | 5             | 3                  | 134-140         | 0.01                    |
| Bmac18         | 11            | 2                  | 131-145         | 0.00                    |
| Bmag382        | (AG)7AA(AG)7  | 2                  | 103-109         | 0.00                    |
| Scssr02748     | 12            | 2                  | 144-158         | 0.01                    |
| Scssr10148     | 10            | 2                  | 178-230         | 0.04                    |
| Scssr08447     | 6             | 3                  | 172-182         | 0.00                    |
| Scssr05939     | 5             | 2                  | 150-160         | 0.03                    |
| Bmag211        | 16            | 2                  | 150-198         | 0.02                    |
| Hvltppb        | 10            | 2                  | 205-229         | 0.75                    |
| Scssr02306     | 13            | 2                  | 150-164         | 0.00                    |
| Scssr15864     | 4             | 3                  | 146-184         | 0.08                    |
| Scssr25691     | 17            | 2                  | 208-250         | 0.07                    |
