# Supplementary material for: Two Genomic Regions Contribute Disproportionately to Geographic Differentiation in Wild Barley
Source: PubMed Central journal article supplement (PMC4455769; doi:10.1534/g3.114.010561), 2014-04-22
Supplement: supp_g3.114.010561_TableS4.pdf [file supp_g3.114.010561_TableS4.pdf]

**Table S4 (A) Environmental variables and abbreviations used in this study; (B) Environmental variable and the corresponding loadings for the first two principal components**

(A)

| Environmental variable                               | Abbreviation |
|------------------------------------------------------|--------------|
| Annual mean temperature                              | bio1         |
| Mean diurnal range                                   | bio2         |
| Isothermality (bio2/bio7)*100 <sup>a</sup>           | bio3         |
| Temperature seasonality (standard deviation*100)     | bio4         |
| Min temperature of the coldest month                 | bio6         |
| Mean temperature of the wettest quarter              | bio8         |
| Mean temperature of the driest quarter               | bio9         |
| Mean temperature of the coldest quarter              | bio11        |
| Annual precipitation                                 | bio12        |
| Precipitation of the wettest month                   | bio13        |
| Precipitation of the driest month                    | bio14        |
| Precipitation seasonality (coefficient of variation) | bio15        |
| Precipitation of the wettest quarter                 | bio16        |
| Precipitation of the driest quarter                  | bio17        |
| Precipitation of the coldest quarter                 | bio19        |
| Monthly minimum and maximum temperature              | tmin#, tmax# |
| Monthly total precipitation                          | prec#        |

<sup>a</sup> bio7: temperature annual range

(B)

| PC1      |          | PC2      |          |
|----------|----------|----------|----------|
| Variable | Loadings | Variable | Loadings |
| bio11    | -0.223   | bio12    | -0.316   |
| tmin2    | -0.222   | bio16    | -0.314   |
| tmax1    | -0.222   | bio13    | -0.310   |
| tmax2    | -0.221   | prec2    | -0.306   |
| tmax12   | -0.221   | bio19    | -0.303   |
| tmax11   | -0.220   | prec1    | -0.297   |
| bio6     | -0.220   | prec12   | -0.295   |
| tmin1    | -0.220   | prec11   | -0.292   |
| tmin3    | -0.220   | prec3    | -0.286   |
| tmin12   | -0.218   | prec10   | -0.180   |
| tmin11   | -0.215   | prec4    | -0.128   |
| tmin10   | -0.215   | alt      | -0.089   |
| tmax3    | -0.211   | bio15    | -0.058   |

|        |        |        |        |
|--------|--------|--------|--------|
| bio1   | -0.209 | tmin11 | -0.039 |
| tmax10 | -0.201 | tmin12 | -0.038 |
| tmin4  | -0.196 | tmin1  | -0.031 |
| tmax4  | -0.179 | bio6   | -0.030 |
| bio3   | -0.178 | tmin10 | -0.019 |
| bio15  | -0.176 | tmin2  | -0.013 |
| bio9   | -0.116 | bio2   | 0.199  |
| bio8   | -0.111 | tmax4  | 0.147  |
| prec12 | -0.080 | bio8   | 0.091  |
| prec1  | -0.079 | bio4   | 0.088  |
| bio19  | -0.068 | tmax3  | 0.086  |
| prec11 | -0.058 | bio9   | 0.086  |
| bio13  | -0.052 | tmin4  | 0.071  |
| bio16  | -0.048 | tmax10 | 0.068  |
| prec2  | -0.047 | bio1   | 0.065  |
| bio12  | 0.003  | tmax2  | 0.047  |
| prec3  | 0.020  | bio3   | 0.041  |
| bio2   | 0.026  | tmax11 | 0.027  |
| prec10 | 0.091  | tmax1  | 0.023  |
| bio14  | 0.112  | tmax12 | 0.022  |
| bio17  | 0.120  | tmin3  | 0.018  |
| prec4  | 0.141  | bio14  | 0.012  |
| alt    | 0.154  | bio17  | 0.004  |
| bio4   | 0.162  | bio11  | 0.003  |
