# Supplementary material for: Two Genomic Regions Contribute Disproportionately to Geographic Differentiation in Wild Barley
Source: PubMed Central journal article supplement (PMC4455769; doi:10.1534/g3.114.010561), 2014-04-22
Supplement: supp_g3.114.010561_TableS6.pdf [file supp_g3.114.010561_TableS6.pdf]

**Table S6 SNPs with  $F_{ST}$  based on the Eastern and Western populations above 95<sup>th</sup> percentile genome-wide, including genetic position, GenBank ID, gene short name, in non-coding or coding region (1<sup>st</sup>, 2<sup>nd</sup> or 3<sup>rd</sup> positions), and silent or replacement information**

| SNP Name | Chr | cM     | $F_{ST}$ | GenBank ID   | Gene Short Name | Position   | Silent |
|----------|-----|--------|----------|--------------|-----------------|------------|--------|
| 11_10017 | 2H  | 81.31  | 0.32     | AK353943     | -               | 3          | yes    |
| 11_10056 | 7H  | 33.49  | 0.41     | AK364330     | -               | non-coding | yes    |
| 11_10116 | 5H  | 41.45  | 0.36     | AK356434     | -               | 3          | yes    |
| 11_10243 | 2H  | 67.08  | 0.41     | XM_003579657 | LOC100838855    | non-coding | yes    |
| 11_10253 | 3H  | 102.66 | 0.36     | -            | -               | -          | -      |
| 11_10424 | 4H  | 56.22  | 0.42     | AK355297     | -               | 3          | yes    |
| 11_10498 | 2H  | 53.09  | 0.35     | AK354555     | -               | 1          | yes    |
| 11_10536 | 5H  | 155.23 | 0.49     | AK354787     | -               | 3          | yes    |
| 11_10614 | 4H  | 111.81 | 0.33     | AK373775     | -               | 3          | yes    |
| 11_10644 | 1H  | 128.63 | 0.32     | AK356375     | -               | non-coding | yes    |
| 11_10685 | 2H  | 72.99  | 0.47     | AK362284     | -               | 3          | yes    |
| 11_10773 | 7H  | 81.78  | 0.36     | AK373162     | -               | non-coding | yes    |
| 11_10813 | 3H  | 83.58  | 0.35     | -            | -               | -          | -      |
| 11_10956 | 7H  | 27.69  | 0.38     | AK365588     | -               | 3          | yes    |
| 11_11024 | 5H  | 121.67 | 0.48     | XM_003561753 | LOC100839369    | 3          | yes    |
| 11_11094 | 2H  | 119.72 | 0.38     | -            | -               | -          | -      |
| 11_11111 | 6H  | 139.09 | 0.39     | AK366470     | -               | non-coding | yes    |
| 11_11243 | 7H  | 121.36 | 0.33     | -            | -               | -          | -      |
| 11_11432 | 5H  | 38.78  | 0.56     | -            | -               | -          | -      |
| 11_20029 | 6H  | 133.25 | 0.51     | AK354118     | -               | 1          | no     |
| 11_20086 | 2H  | 110.93 | 0.32     | AK358640     | -               | non-coding | yes    |
| 11_20133 | 1H  | 132.16 | 0.47     | AK361091     | -               | non-coding | yes    |
| 11_20251 | 2H  | 68.56  | 0.36     | AK370757     | -               | non-coding | yes    |
| 11_20283 | 5H  | 51.51  | 0.32     | XM_003576993 | LOC100831472    | 3          | yes    |
| 11_20347 | 5H  | 121.67 | 0.48     | AK359986     | -               | 3          | yes    |
| 11_20390 | 2H  | 72.99  | 0.46     | FN179383     | SBE2a           | 3          | yes    |
| 11_20476 | 2H  | 67.08  | 0.33     | BT087333     | -               | non-coding | yes    |
| 11_20482 | 4H  | 69.24  | 0.31     | AK355084     | -               | 3          | yes    |
| 11_20498 | 2H  | 116.5  | 0.4      | AK359654     | -               | 3          | yes    |
| 11_20577 | 6H  | 80.06  | 0.31     | AK355031     | -               | non-coding | yes    |
| 11_20620 | 6H  | 78.52  | 0.31     | AK366751     | -               | non-coding | yes    |
| 11_20669 | 2H  | 68.56  | 0.34     | AK356298     | -               | non-coding | yes    |
| 11_20798 | 1H  | 48.99  | 0.32     | AK354088     | -               | non-coding | yes    |
| 11_20904 | 6H  | 72.17  | 0.36     | -            | -               | -          | -      |
| 11_21302 | 7H  | 81.78  | 0.33     | XM_003560861 | LOC100844834    | non-coding | yes    |

|          |    |        |      |              |              |            |     |
|----------|----|--------|------|--------------|--------------|------------|-----|
| 11_21399 | 2H | 72.99  | 0.69 | AK357878     | -            | 1          | no  |
| 11_21406 | 2H | 142.67 | 0.34 | AK370573     | -            | 2          | no  |
| 11_21447 | 5H | 41.45  | 0.53 | AK364513     | -            | 2          | no  |
| 11_21452 | 5H | 155.23 | 0.53 | AK372156     | -            | 1          | no  |
| 11_21502 | 3H | 76.43  | 0.55 | AK356987     | -            | 3          | yes |
| 11_21504 | 4H | 80.73  | 0.45 | -            | -            | -          | -   |
| 12_10053 | 4H | 76.31  | 0.46 | AK370758     | -            | 3          | yes |
| 12_10071 | 6H | 130.38 | 0.47 | AK355485     | -            | non-coding | yes |
| 12_10154 | 2H | 69.05  | 0.71 | AK355324     | -            | non-coding | yes |
| 12_10170 | 4H | 88.7   | 0.44 | AK373474     | -            | non-coding | yes |
| 12_10171 | 4H | 43.72  | 0.34 | AK368127     | -            | 1          | no  |
| 12_10199 | 6H | 49.67  | 0.64 | AK376992     | -            | non-coding | yes |
| 12_10203 | 5H | 59.72  | 0.52 | AK356265     | -            | 3          | yes |
| 12_10219 | 0  | 0      | 0.33 | AY039003     | Xantha-f     | 3          | yes |
| 12_10264 | 5H | 47.04  | 0.52 | WHTe1A       | E1           | non-coding | yes |
| 12_10284 | 0  | 0      | 0.47 | XM_003564030 | LOC100843138 | 3          | yes |
| 12_10347 | 4H | 43.72  | 0.5  | AK362515     | -            | non-coding | yes |
| 12_10472 | 2H | 147.37 | 0.31 | AK356296     | -            | non-coding | yes |
| 12_10497 | 6H | 56.06  | 0.48 | XM_003570288 | LOC100839823 | 1          | no  |
| 12_10543 | 7H | 121.36 | 0.4  | DQ529207     | Xantha-h     | non-coding | yes |
| 12_10591 | 6H | 59.25  | 0.44 | AK361815     | -            | 1          | no  |
| 12_10633 | 5H | 69.29  | 0.32 | AK371801     | -            | non-coding | yes |
| 12_10634 | 5H | 68.21  | 0.32 | AK360310     | -            | 3          | yes |
| 12_10689 | 0  | 0      | 0.38 | AK369452     | -            | non-coding | yes |
| 12_10810 | 4H | 37.88  | 0.69 | AK366265     | -            | non-coding | yes |
| 12_11030 | 2H | 6.09   | 0.31 | AK364311     | -            | non-coding | yes |
| 12_11107 | 1H | 47.21  | 0.35 | AK364999     | -            | non-coding | yes |
| 12_11139 | 4H | 111.81 | 0.38 | Y14573       | Mlo          | 3          | yes |
| 12_11151 | 5H | 51.51  | 0.88 | AK354730     | -            | 3          | yes |
| 12_11184 | 7H | 118.44 | 0.42 | AK358083     | -            | non-coding | yes |
| 12_11269 | 0  | 0      | 0.41 | AK361959     | -            | 1          | no  |
| 12_11271 | 1H | 136.7  | 0.4  | -            | -            | -          | -   |
| 12_11288 | 2H | 67.08  | 0.52 | AK366035     | -            | 3          | no  |
| 12_11310 | 3H | 13.13  | 0.36 | AK372013     | -            | 3          | yes |
| 12_11316 | 2H | 73.89  | 0.49 | AK354712     | -            | non-coding | yes |
| 12_11324 | 2H | 72.99  | 0.91 | AK356277     | -            | non-coding | yes |
| 12_11377 | 7H | 84.3   | 0.34 | AK361273     | -            | 3          | yes |
| 12_11408 | 0  | 0      | 0.41 | -            | -            | -          | -   |
| 12_20196 | 2H | 67.08  | 0.55 | AK362518     | -            | non-coding | yes |

|          |    |        |      |              |              |            |     |
|----------|----|--------|------|--------------|--------------|------------|-----|
| 12_20235 | 2H | 61.49  | 0.4  | AK376421     | -            | non-coding | yes |
| 12_20278 | 5H | 59.72  | 0.52 | AK356265     | -            | 1          | no  |
| 12_20326 | 2H | 42.01  | 0.36 | AK365480     | -            | non-coding | yes |
| 12_20593 | 2H | 29.05  | 0.44 | AK367163     | -            | non-coding | yes |
| 12_20760 | 4H | 138.7  | 0.39 | -            | -            | -          | -   |
| 12_20981 | 5H | 51.51  | 0.85 | AK370568     | -            | 3          | yes |
| 12_20989 | 2H | 130.38 | 0.51 | XM_003580352 | LOC100845048 | 2          | no  |
| 12_21003 | 0  | 0      | 0.76 | -            | -            | -          | -   |
| 12_21117 | 4H | 0      | 0.32 | AK359776     | -            | non-coding | yes |
| 12_21234 | 7H | 68.89  | 0.54 | AK356095     | -            | 2          | no  |
| 12_21319 | 7H | 82.41  | 0.37 | XM_003573274 | LOC100845308 | non-coding | yes |
| 12_30004 | 7H | 81.78  | 0.34 | -            | -            | -          | -   |
| 12_30049 | 2H | 118.39 | 0.41 | -            | -            | -          | -   |
| 12_30056 | 5H | 107.19 | 0.35 | AK356430     | -            | non-coding | yes |
| 12_30068 | 2H | 67.08  | 0.52 | AK364966     | -            | 3          | yes |
| 12_30164 | 7H | 118.44 | 0.41 | AK360970     | -            | non-coding | yes |
| 12_30250 | 3H | 106.67 | 0.65 | AK356601     | -            | non-coding | yes |
| 12_30441 | 6H | 58.48  | 0.36 | XM_003570517 | LOC100832867 | 3          | yes |
| 12_30492 | 7H | 81.78  | 0.41 | EU961304     | -            | 1          | no  |
| 12_30504 | 5H | 173.5  | 0.32 | -            | -            | -          | -   |
| 12_30563 | 7H | 81.78  | 0.33 | AJ582181     | core3ft      | 2          | no  |
| 12_30581 | 7H | 79.08  | 0.45 | AK356791     | -            | 3          | yes |
| 12_30600 | 7H | 81.78  | 0.54 | AK362488     | -            | non-coding | yes |
| 12_30616 | 3H | 78.25  | 0.58 | AK365474     | -            | non-coding | yes |
| 12_30694 | 1H | 45.2   | 0.6  | -            | -            | -          | -   |
| 12_30737 | 3H | 59.83  | 0.39 | AK361759     | -            | 3          | yes |
| 12_30765 | 6H | 59.25  | 0.44 | AK356029     | -            | 3          | yes |
| 12_30823 | 2H | 164.35 | 0.32 | AK375658     | -            | 3          | no  |
| 12_30850 | 5H | 98.2   | 0.63 | DQ480160     | CBF4B        | non-coding | yes |
| 12_30956 | 6H | 142.2  | 0.35 | -            | -            | -          | -   |
| 12_30988 | 4H | 111.81 | 0.52 | Y14573       | Mlo          | non-coding | yes |
| 12_31017 | 3H | 67.86  | 0.31 | AK356796     | -            | non-coding | yes |
| 12_31021 | 2H | 82.44  | 0.51 | AF112963     | Cht2         | non-coding | yes |
| 12_31032 | 5H | 52.86  | 0.33 | AF326715     | adh3         | non-coding | yes |
| 12_31035 | 5H | 52.86  | 0.33 | DQ195967     | adh3         | non-coding | yes |
| 12_31043 | 6H | 112.39 | 0.31 | AY349220     | Dhn5         | 3          | yes |
| 12_31062 | 5H | 51.51  | 0.48 | AK365941     | -            | 3          | yes |
| 12_31064 | 5H | 51.51  | 0.68 | AK365941     | -            | 3          | yes |
| 12_31100 | 2H | 142.67 | 0.34 | AK370573     | -            | 2          | no  |

|          |    |       |      |          |   |            |     |
|----------|----|-------|------|----------|---|------------|-----|
| 12_31202 | 0  | 0     | 0.33 | AK358464 | - | non-coding | yes |
| 12_31203 | 0  | 0     | 0.34 | AK368679 | - | non-coding | yes |
| 12_31242 | 3H | 82.62 | 0.36 | AK369382 | - | non-coding | yes |
| 12_31246 | 4H | 92.41 | 0.48 | AK362249 | - | non-coding | yes |
| 12_31274 | 6H | 52.85 | 0.38 | AK357603 | - | non-coding | yes |
| 12_31385 | 4H | 77.66 | 0.32 | AK357832 | - | non-coding | yes |

---
