# Supplementary material for: Two Genomic Regions Contribute Disproportionately to Geographic Differentiation in Wild Barley
Source: PubMed Central journal article supplement (PMC4455769; doi:10.1534/g3.114.010561), 2014-04-22
Supplement: supp_g3.114.010561_TableS7.pdf [file supp_g3.114.010561_TableS7.pdf]

**Table S7 SNPs with Bayes Factor from environmental association analysis (Bayenv) above 95<sup>th</sup> percentile genome-wide, including genetic position, GenBank ID, gene short name, in non-coding or coding region (1<sup>st</sup>, 2<sup>nd</sup> or 3<sup>rd</sup> positions), and silent or replacement information. (A) PC1; (B) PC2**

(A)

| SNP Name | Chr | cM     | Bayes Factor | GenBank ID   | Gene Short Name | Position   | Silent |
|----------|-----|--------|--------------|--------------|-----------------|------------|--------|
| 11_10011 | 3H  | 67.86  | 9.22         | AK371824     | -               | non-coding | yes    |
| 11_10090 | 4H  | 86.01  | 3.91         | AK376851     | -               | non-coding | yes    |
| 11_10172 | 3H  | 82.62  | 5.04         | AK366339     | -               | non-coding | yes    |
| 11_10184 | 3H  | 110.75 | 3.72         | AK359211     | -               | 3          | yes    |
| 11_10208 | 4H  | 2.6    | 3.76         | AK359180     | -               | 3          | yes    |
| 11_10232 | 7H  | 29.05  | 3.89         | -            | -               | -          | -      |
| 11_10247 | 4H  | 87.01  | 4.32         | AJ585385     | bcb             | 3          | no     |
| 11_10253 | 3H  | 102.66 | 6.72         | -            | -               | -          | -      |
| 11_10446 | 2H  | 140.69 | 4.00         | XM_003560174 | LOC100837523    | 1          | no     |
| 11_10641 | 5H  | 59.72  | 4.10         | AK355250     | -               | 3          | yes    |
| 11_10653 | 3H  | 69.4   | 4.18         | AK356876     | -               | 2          | no     |
| 11_10744 | 1H  | 23.62  | 4.80         | AK353610     | -               | non-coding | yes    |
| 11_10813 | 3H  | 83.58  | 8.40         | -            | -               | -          | -      |
| 11_10818 | 2H  | 90.48  | 5.18         | AK360545     | -               | non-coding | yes    |
| 11_10925 | 3H  | 66.62  | 3.83         | AK363708     | -               | non-coding | yes    |
| 11_10989 | 2H  | 125.97 | 6.42         | BLYCLDAB     | cold-regulated  | non-coding | yes    |
| 11_11111 | 6H  | 139.09 | 4.38         | AK366470     | -               | non-coding | yes    |
| 11_11211 | 2H  | 67.08  | 4.06         | -            | -               | -          | -      |
| 11_11361 | 0   | 0      | 9.94         | JF796668     | CBF4            | 2          | no     |
| 11_11497 | 5H  | 151.35 | 6.31         | AK358288     | -               | 3          | yes    |
| 11_11521 | 7H  | 127.74 | 18.19        | AK376764     | -               | 3          | yes    |
| 11_20012 | 4H  | 43.72  | 3.87         | AK374823     | -               | non-coding | yes    |
| 11_20078 | 5H  | 155.66 | 5.77         | AK376547     | -               | 3          | yes    |
| 11_20113 | 7H  | 49.61  | 5.40         | AK355306     | -               | non-coding | yes    |
| 11_20133 | 1H  | 132.16 | 3.67         | AK361091     | -               | non-coding | yes    |
| 11_20251 | 2H  | 68.56  | 5.27         | AK370757     | -               | non-coding | yes    |
| 11_20306 | 5H  | 50.53  | 5.22         | AK365203     | -               | non-coding | yes    |
| 11_20495 | 7H  | 18.73  | 3.96         | AK359539     | -               | non-coding | yes    |
| 11_20537 | 6H  | 142.2  | 4.60         | FJ853600     | GSL2            | non-coding | yes    |
| 11_20583 | 3H  | 66.62  | 4.92         | AK365999     | -               | non-coding | yes    |
| 11_20620 | 6H  | 78.52  | 7.50         | AK366751     | -               | non-coding | yes    |
| 11_20626 | 3H  | 109.43 | 3.65         | AK366712     | -               | 3          | yes    |
| 11_20722 | 7H  | 13.7   | 5.24         | AK377052     | -               | 3          | yes    |
| 11_20797 | 3H  | 5.36   | 3.96         | AK375179     | -               | non-coding | yes    |

|          |    |        |       |              |              |            |     |
|----------|----|--------|-------|--------------|--------------|------------|-----|
| 11_21030 | 6H | 44.96  | 3.79  | AK375921     | -            | 2          | no  |
| 11_21083 | 3H | 111.49 | 4.11  | AK372580     | -            | non-coding | yes |
| 11_21174 | 1H | 8.96   | 4.49  | -            | -            | -          | -   |
| 11_21191 | 4H | 70.77  | 3.46  | AK355907     | -            | non-coding | yes |
| 11_21192 | 1H | 89.77  | 5.99  | AK357712     | -            | non-coding | yes |
| 11_21193 | 1H | 42.42  | 7.48  | AK363338     | -            | non-coding | yes |
| 11_21201 | 7H | 98.95  | 5.56  | -            | -            | -          | -   |
| 11_21216 | 6H | 59.25  | 5.25  | AK376749     | -            | 3          | yes |
| 11_21274 | 2H | 154.39 | 3.85  | AK354727     | -            | non-coding | yes |
| 11_21296 | 4H | 71.71  | 4.88  | AK353992     | -            | non-coding | yes |
| 11_21325 | 5H | 123.12 | 3.84  | AK362100     | -            | non-coding | yes |
| 11_21399 | 2H | 72.99  | 8.21  | AK357878     | -            | 1          | no  |
| 11_21406 | 2H | 142.67 | 3.68  | AK370573     | -            | 2          | no  |
| 11_21459 | 2H | 143.18 | 4.78  | AM039897     | ahh1         | 2          | no  |
| 11_21502 | 3H | 76.43  | 3.57  | AK356987     | -            | 3          | yes |
| 12_10122 | 3H | 143.33 | 4.09  | AK369540     | -            | non-coding | yes |
| 12_10154 | 2H | 69.05  | 14.43 | AK355324     | -            | non-coding | yes |
| 12_10199 | 6H | 49.67  | 4.42  | AK376992     | -            | non-coding | yes |
| 12_10268 | 7H | 81.78  | 5.32  | XM_003574799 | LOC100825330 | 3          | yes |
| 12_10535 | 1H | 91.73  | 9.41  | AK358527     | -            | 3          | yes |
| 12_10678 | 3H | 71.26  | 4.44  | AK356724     | -            | non-coding | yes |
| 12_10810 | 4H | 37.88  | 3.49  | AK366265     | -            | non-coding | yes |
| 12_10824 | 4H | 102.93 | 4.39  | XM_003577507 | LOC100843401 | non-coding | yes |
| 12_10938 | 1H | 44.59  | 4.96  | AK359548     | -            | 1          | no  |
| 12_11030 | 2H | 6.09   | 4.18  | AK364311     | -            | non-coding | yes |
| 12_11051 | 7H | 105.73 | 7.91  | -            | -            | -          | -   |
| 12_11151 | 5H | 51.51  | 3.94  | AK354730     | -            | 3          | yes |
| 12_11154 | 3H | 147.57 | 3.85  | -            | -            | -          | -   |
| 12_11271 | 1H | 136.7  | 11.25 | -            | -            | -          | -   |
| 12_11288 | 2H | 67.08  | 5.01  | AK366035     | -            | 3          | no  |
| 12_11324 | 2H | 72.99  | 41.73 | AK356277     | -            | non-coding | yes |
| 12_11386 | 0  | 0      | 5.77  | -            | -            | -          | -   |
| 12_11408 | 0  | 0      | 4.50  | -            | -            | -          | -   |
| 12_11455 | 6H | 44.96  | 4.34  | AK362081     | -            | non-coding | yes |
| 12_11494 | 6H | 111.74 | 3.53  | AK368552     | -            | non-coding | yes |
| 12_20235 | 2H | 61.49  | 5.61  | AK376421     | -            | non-coding | yes |
| 12_20760 | 4H | 138.7  | 8.63  | -            | -            | -          | -   |
| 12_20867 | 5H | 167.4  | 3.85  | AK359088     | -            | non-coding | yes |
| 12_20981 | 5H | 51.51  | 4.68  | AK370568     | -            | 3          | yes |

|          |    |        |       |              |              |            |     |
|----------|----|--------|-------|--------------|--------------|------------|-----|
| 12_21117 | 4H | 0      | 5.34  | AK359776     | -            | non-coding | yes |
| 12_21234 | 7H | 68.89  | 3.83  | AK356095     | -            | 2          | no  |
| 12_21319 | 7H | 82.41  | 4.40  | XM_003573274 | LOC100845308 | non-coding | yes |
| 12_21337 | 2H | 67.08  | 3.88  | AK358015     | -            | 3          | yes |
| 12_30004 | 7H | 81.78  | 4.04  | -            | -            | -          | -   |
| 12_30060 | 4H | 62.81  | 9.76  | AK365085     | -            | non-coding | yes |
| 12_30064 | 3H | 50.19  | 3.70  | AK367843     | -            | non-coding | yes |
| 12_30068 | 2H | 67.08  | 5.01  | AK364966     | -            | 3          | yes |
| 12_30080 | 5H | 60.21  | 3.66  | -            | -            | -          | -   |
| 12_30135 | 3H | 179.81 | 3.94  | AK356358     | -            | non-coding | yes |
| 12_30170 | 3H | 92.73  | 3.50  | AK353673     | -            | 3          | yes |
| 12_30206 | 2H | 67.08  | 3.88  | -            | -            | -          | -   |
| 12_30367 | 3H | 149.45 | 15.26 | AK353825     | -            | non-coding | yes |
| 12_30404 | 1H | 42.42  | 4.06  | AK355367     | -            | 3          | yes |
| 12_30475 | 7H | 82.41  | 5.64  | AK372209     | -            | non-coding | yes |
| 12_30491 | 2H | 49.5   | 3.90  | -            | -            | -          | -   |
| 12_30492 | 7H | 81.78  | 5.94  | EU961304     | -            | 1          | no  |
| 12_30504 | 5H | 173.5  | 6.24  | -            | -            | -          | -   |
| 12_30554 | 4H | 102.93 | 5.72  | AK354013     | -            | 2          | no  |
| 12_30574 | 7H | 82.41  | 4.96  | AK370386     | -            | 3          | yes |
| 12_30581 | 7H | 79.08  | 18.82 | AK356791     | -            | 3          | yes |
| 12_30674 | 2H | 85.52  | 4.34  | AK369978     | -            | non-coding | yes |
| 12_30715 | 1H | 3.21   | 4.57  | AK362579     | -            | non-coding | yes |
| 12_30724 | 2H | 72.99  | 3.51  | AK368064     | -            | 3          | yes |
| 12_30743 | 3H | 87.8   | 4.49  | AK364775     | -            | non-coding | yes |
| 12_30745 | 5H | 55.44  | 3.61  | AK366468     | -            | 3          | yes |
| 12_30779 | 0  | 0      | 5.07  | AK376832     | -            | non-coding | yes |
| 12_30781 | 2H | 9.12   | 4.05  | AK361785     | -            | non-coding | yes |
| 12_30782 | 6H | 53.54  | 6.44  | -            | -            | -          | -   |
| 12_30806 | 7H | 99.94  | 4.96  | -            | -            | -          | -   |
| 12_31032 | 5H | 52.86  | 3.59  | AF326715     | adh3         | non-coding | yes |
| 12_31066 | 0  | 0      | 4.85  | AK372734     | -            | 3          | yes |
| 12_31081 | 1H | 143.2  | 21.95 | AK356376     | -            | 3          | yes |
| 12_31100 | 2H | 142.67 | 3.68  | AK370573     | -            | 2          | no  |
| 12_31218 | 2H | 67.08  | 5.54  | AK368932     | -            | 2          | no  |
| 12_31234 | 5H | 141.88 | 9.78  | AK358248     | -            | non-coding | yes |
| 12_31357 | 0  | 0      | 6.10  | -            | -            | -          | -   |
| 12_31363 | 7H | 116.94 | 3.45  | AK375416     | -            | non-coding | yes |
| 12_31381 | 1H | 44.59  | 3.44  | -            | -            | -          | -   |

|          |    |        |       |          |   |            |     |
|----------|----|--------|-------|----------|---|------------|-----|
| 12_31383 | 2H | 84.96  | 3.84  | AK363632 | - | non-coding | yes |
| 12_31385 | 4H | 77.66  | 4.68  | AK357832 | - | non-coding | yes |
| 12_31392 | 6H | 127.76 | 5.64  | AK354269 | - | non-coding | yes |
| 12_31424 | 2H | 101.72 | 3.69  | AK375713 | - | non-coding | yes |
| 12_31486 | 4H | 6.86   | 30.04 | -        | - | -          | -   |

(B)

| SNP Name | Chr | cM     | Bayes Factor | GenBank ID | Gene Short Name | Position   | Silent |
|----------|-----|--------|--------------|------------|-----------------|------------|--------|
| 11_10006 | 1H  | 76.92  | 4.55         | AM502852   | tub4            | 3          | yes    |
| 11_10052 | 4H  | 76.31  | 3.08         | AK370758   | -               | non-coding | yes    |
| 11_10129 | 6H  | 44.96  | 4.94         | AK370146   | -               | 3          | yes    |
| 11_10172 | 3H  | 82.62  | 3.72         | AK366339   | -               | non-coding | yes    |
| 11_10194 | 2H  | 67.08  | 2.86         | AK359415   | -               | 3          | yes    |
| 11_10217 | 5H  | 149.94 | 3.16         | AK354403   | -               | non-coding | yes    |
| 11_10240 | 5H  | 42.41  | 2.81         | AK359441   | -               | non-coding | yes    |
| 11_10329 | 2H  | 168.26 | 3.71         | AK362809   | -               | non-coding | yes    |
| 11_10424 | 4H  | 56.22  | 2.83         | AK355297   | -               | 3          | yes    |
| 11_10522 | 1H  | 101.34 | 6.60         | AK360842   | -               | 1          | yes    |
| 11_10580 | 5H  | 29.9   | 18.54        | AK372891   | -               | non-coding | yes    |
| 11_10641 | 5H  | 59.72  | 5.49         | AK355250   | -               | 3          | yes    |
| 11_10653 | 3H  | 69.4   | 2.96         | AK356876   | -               | 2          | no     |
| 11_10767 | 3H  | 179.16 | 4.15         | -          | -               | -          | -      |
| 11_10780 | 2H  | 137.03 | 6.67         | AK359167   | -               | 3          | yes    |
| 11_10919 | 2H  | 42.01  | 2.92         | AK368475   | -               | non-coding | yes    |
| 11_11019 | 4H  | 146.48 | 2.85         | FN179393   | BAM1            | 2          | no     |
| 11_11111 | 6H  | 139.09 | 4.09         | AK366470   | -               | non-coding | yes    |
| 11_11147 | 6H  | 95.7   | 2.92         | GU258512   | -               | non-coding | yes    |
| 11_11219 | 7H  | 82.2   | 5.81         | AK368527   | -               | 2          | no     |
| 11_11406 | 6H  | 6.54   | 5.20         | AF166121   | Big1            | 3          | yes    |
| 11_11521 | 7H  | 127.74 | 4.21         | AK376764   | -               | 3          | yes    |
| 11_20114 | 4H  | 44.99  | 3.66         | AK360127   | -               | 3          | yes    |
| 11_20129 | 5H  | 42.41  | 2.90         | AK362176   | -               | non-coding | yes    |
| 11_20179 | 5H  | 42.41  | 2.85         | AK357883   | -               | non-coding | yes    |
| 11_20260 | 1H  | 42.42  | 7.95         | AK355367   | -               | 3          | yes    |
| 11_20306 | 5H  | 50.53  | 4.87         | AK365203   | -               | non-coding | yes    |
| 11_20332 | 5H  | 49.16  | 3.04         | WHE1A      | E1              | non-coding | yes    |
| 11_20347 | 5H  | 121.67 | 4.55         | AK359986   | -               | 3          | yes    |
| 11_20355 | 6H  | 120.69 | 3.68         | AK353922   | -               | non-coding | yes    |

|          |    |        |       |              |                         |   |     |
|----------|----|--------|-------|--------------|-------------------------|---|-----|
| 11_20383 | 1H | 134.96 | 5.76  | XM_003567791 | LOC100830416            | 3 | yes |
| 11_20390 | 2H | 72.99  | 10.41 | FN179383     | SBE2a                   | 3 | yes |
| 11_20438 | 2H | 69.05  | 4.78  | AK364463     | - non-coding            |   | yes |
| 11_20485 | 7H | 91.67  | 4.67  | -            | -                       | - | -   |
| 11_20498 | 2H | 116.5  | 2.96  | AK359654     | -                       | 3 | yes |
| 11_20527 | 3H | 142.17 | 5.48  | XM_003572099 | LOC100831350            | 3 | yes |
| 11_20620 | 6H | 78.52  | 12.93 | AK366751     | - non-coding            |   | yes |
| 11_20709 | 6H | 74.65  | 2.86  | AK363507     | -                       | 3 | yes |
| 11_20736 | 5H | 72.68  | 3.59  | AK372237     | -                       | 3 | yes |
| 11_20797 | 3H | 5.36   | 4.23  | AK375179     | - non-coding            |   | yes |
| 11_20889 | 6H | 86.54  | 3.18  | XM_002454244 | - non-coding            |   | yes |
| 11_20924 | 4H | 75.44  | 5.18  | AK376504     | -                       | 1 | no  |
| 11_20958 | 5H | 42.41  | 2.90  | AK372310     | -                       | 3 | yes |
| 11_20996 | 6H | 104.5  | 5.87  | AK360096     | -                       | 3 | yes |
| 11_21000 | 1H | 45.85  | 6.15  | AK370060     | -                       | 3 | yes |
| 11_21040 | 5H | 42.41  | 2.81  | AK370183     | - non-coding            |   | yes |
| 11_21181 | 2H | 155.68 | 6.75  | AK354575     | -                       | 3 | yes |
| 11_21193 | 1H | 42.42  | 7.31  | AK363338     | - non-coding            |   | yes |
| 11_21201 | 7H | 98.95  | 10.97 | -            | -                       | - | -   |
| 11_21399 | 2H | 72.99  | 8.83  | AK357878     | -                       | 1 | no  |
| 11_21494 | 7H | 81.78  | 3.46  | -            | -                       | - | -   |
| 12_10053 | 4H | 76.31  | 6.89  | AK370758     | -                       | 3 | yes |
| 12_10063 | 4H | 44.99  | 3.28  | AK360127     | - non-coding            |   | yes |
| 12_10089 | 7H | 91.12  | 3.90  | -            | -                       | - | -   |
| 12_10154 | 2H | 69.05  | 3.05  | AK355324     | - non-coding            |   | yes |
| 12_10159 | 1H | 42.42  | 2.78  | FN555319     | pdil4-1                 | 1 | no  |
| 12_10300 | 1H | 42.42  | 4.35  | EU131177     | PR-17c non-coding       |   | yes |
| 12_10313 | 0  | 0      | 4.12  | NM_001061695 | Os05g0311000            | - | -   |
| 12_10392 | 6H | 72.17  | 3.45  | AK361836     | -                       | 3 | yes |
| 12_10657 | 7H | 61.67  | 5.82  | AK366264     | -                       | 3 | yes |
| 12_10717 | 2H | 82.98  | 6.74  | -            | -                       | - | -   |
| 12_10810 | 4H | 37.88  | 3.63  | AK366265     | - non-coding            |   | yes |
| 12_10824 | 4H | 102.93 | 2.92  | XM_003577507 | LOC100843401 non-coding |   | yes |
| 12_10938 | 1H | 44.59  | 5.96  | AK359548     | -                       | 1 | no  |
| 12_11078 | 0  | 0      | 2.81  | AK372406     | - non-coding            |   | yes |
| 12_11151 | 5H | 51.51  | 5.38  | AK354730     | -                       | 3 | yes |
| 12_11271 | 1H | 136.7  | 6.00  | -            | -                       | - | -   |
| 12_11324 | 2H | 72.99  | 23.02 | AK356277     | - non-coding            |   | yes |
| 12_11357 | 1H | 30.15  | 7.86  | AK357047     | -                       | 1 | no  |

|          |    |        |       |               |              |            |     |
|----------|----|--------|-------|---------------|--------------|------------|-----|
| 12_11368 | 2H | 160.46 | 4.06  | AK360506      | -            | non-coding | yes |
| 12_11468 | 0  | 0      | 3.13  | AK359839      | -            | non-coding | yes |
| 12_20235 | 2H | 61.49  | 6.27  | AK376421      | -            | non-coding | yes |
| 12_20424 | 0  | 0      | 4.52  | AK373140      | -            | non-coding | yes |
| 12_20649 | 0  | 0      | 3.53  | -             | -            | -          | -   |
| 12_20760 | 4H | 138.7  | 5.50  | -             | -            | -          | -   |
| 12_20793 | 2H | 103.13 | 3.97  | AK371934      | -            | 2          | no  |
| 12_20981 | 5H | 51.51  | 4.73  | AK370568      | -            | 3          | yes |
| 12_21003 | 0  | 0      | 3.04  | -             | -            | -          | -   |
| 12_21131 | 1H | 59.99  | 3.29  | AK362065      | -            | 3          | yes |
| 12_21462 | 5H | 143.29 | 2.83  | AF109194      | -            | non-coding | yes |
| 12_30005 | 3H | 77.37  | 2.98  | -             | -            | -          | -   |
| 12_30060 | 4H | 62.81  | 10.00 | AK365085      | -            | non-coding | yes |
| 12_30170 | 3H | 92.73  | 2.95  | AK353673      | -            | 3          | yes |
| 12_30204 | 1H | 89.77  | 3.69  | AK356336      | -            | 3          | yes |
| 12_30226 | 4H | 89.36  | 8.78  | -             | -            | -          | -   |
| 12_30242 | 7H | 30.69  | 3.15  | XM_003580160  | LOC100839055 | 1          | yes |
| 12_30250 | 3H | 106.67 | 4.57  | AK356601      | -            | non-coding | yes |
| 12_30275 | 2H | 72.99  | 3.23  | -             | -            | -          | -   |
| 12_30342 | 3H | 114.36 | 3.00  | -             | -            | -          | -   |
| 12_30389 | 7H | 81.78  | 3.29  | FN179370      | AGP-S1a      | 3          | yes |
| 12_30403 | 1H | 128.04 | 6.73  | -             | -            | -          | -   |
| 12_30404 | 1H | 42.42  | 10.32 | AK355367      | -            | 3          | yes |
| 12_30438 | 1H | 42.42  | 2.78  | AK376647      | -            | 3          | yes |
| 12_30475 | 7H | 82.41  | 23.08 | AK372209      | -            | non-coding | yes |
| 12_30491 | 2H | 49.5   | 11.08 | -             | -            | -          | -   |
| 12_30494 | 5H | 171.58 | 8.49  | JX046065      | ERS1a        | 3          | yes |
| 12_30504 | 5H | 173.5  | 4.08  | -             | -            | -          | -   |
| 12_30528 | 7H | 42.26  | 9.06  | -             | -            | -          | -   |
| 12_30574 | 7H | 82.41  | 4.07  | AK370386      | -            | 3          | yes |
| 12_30581 | 7H | 79.08  | 7.89  | AK356791      | -            | 3          | yes |
| 12_30651 | 6H | 7.87   | 4.28  | AK358128      | -            | non-coding | yes |
| 12_30674 | 2H | 85.52  | 2.89  | AK369978      | -            | non-coding | yes |
| 12_30768 | 5H | 42.41  | 2.81  | AK371364      | -            | non-coding | yes |
| 12_30781 | 2H | 9.12   | 3.22  | AK361785      | -            | non-coding | yes |
| 12_30976 | 5H | 1.91   | 3.40  | SEG_AY643842S | -            | non-coding | yes |
| 12_30988 | 4H | 111.81 | 3.04  | Y14573        | Mlo          | non-coding | yes |
| 12_30993 | 4H | 49.43  | 4.61  | XM_003577562  | LOC100833831 | 3          | yes |
| 12_31032 | 5H | 52.86  | 8.13  | AF326715      | adh3         | non-coding | yes |

|          |    |        |      |          |      |            |     |
|----------|----|--------|------|----------|------|------------|-----|
| 12_31035 | 5H | 52.86  | 9.13 | DQ195967 | adh3 | non-coding | yes |
| 12_31064 | 5H | 51.51  | 3.07 | AK365941 | -    | 3          | yes |
| 12_31081 | 1H | 143.2  | 3.39 | AK356376 | -    | 3          | yes |
| 12_31183 | 5H | 50.53  | 3.78 | AK362952 | -    | non-coding | yes |
| 12_31207 | 0  | 0      | 5.27 | AK356841 | -    | 3          | yes |
| 12_31234 | 5H | 141.88 | 2.78 | AK358248 | -    | non-coding | yes |
| 12_31270 | 0  | 0      | 3.11 | AK361597 | -    | non-coding | yes |
| 12_31377 | 1H | 128.04 | 6.56 | AK374439 | -    | 3          | yes |
| 12_31424 | 2H | 101.72 | 3.59 | AK375713 | -    | non-coding | yes |
| 12_31486 | 4H | 6.86   | 9.19 | -        | -    | -          | -   |

---
