# Supplementary material for: Two Genomic Regions Contribute Disproportionately to Geographic Differentiation in Wild Barley
Source: PubMed Central journal article supplement (PMC4455769; doi:10.1534/g3.114.010561), 2014-04-22
Supplement: supp_g3.114.010561_TableS8.pdf [file supp_g3.114.010561_TableS8.pdf]

**Table S8 SNPs with SPA score above 95<sup>th</sup> percentile genome-wide, including genetic position, GenBank ID, gene short name, in non-coding or coding region (1<sup>st</sup>, 2<sup>nd</sup> or 3<sup>rd</sup> positions), and silent or replacement information**

| SNP Name | Chr | cM     | SPA score | GenBank ID | Gene Short Name | Position   | Silent |
|----------|-----|--------|-----------|------------|-----------------|------------|--------|
| 11_10006 | 1H  | 76.92  | 2.83      | AM502852   | tub4            | 3          | yes    |
| 11_10017 | 2H  | 81.31  | 2.96      | AK353943   | -               | 3          | yes    |
| 11_10056 | 7H  | 33.49  | 3.78      | AK364330   | -               | non-coding | yes    |
| 11_10104 | 5H  | 141.88 | 2.86      | -          | -               | -          | -      |
| 11_10169 | 7H  | 106.8  | 3.34      | AK367663   | -               | non-coding | yes    |
| 11_10196 | 2H  | 89.68  | 3.14      | AK362580   | -               | 3          | yes    |
| 11_10253 | 3H  | 102.66 | 2.84      | -          | -               | -          | -      |
| 11_10477 | 5H  | 107.19 | 3.19      | AK354978   | -               | 3          | yes    |
| 11_10518 | 5H  | 88.05  | 2.93      | AK372467   | -               | 1          | no     |
| 11_10536 | 5H  | 155.23 | 3.25      | AK354787   | -               | 3          | yes    |
| 11_10547 | 7H  | 160.97 | 3.48      | AK357875   | -               | 3          | yes    |
| 11_10557 | 5H  | 144.6  | 2.95      | AK371672   | -               | 3          | yes    |
| 11_10580 | 5H  | 29.9   | 3.02      | AK372891   | -               | non-coding | yes    |
| 11_10614 | 4H  | 111.81 | 3.80      | AK373775   | -               | 3          | yes    |
| 11_10619 | 2H  | 95.58  | 3.00      | AK373516   | -               | non-coding | yes    |
| 11_10653 | 3H  | 69.4   | 3.67      | AK356876   | -               | 2          | no     |
| 11_10668 | 4H  | 50.22  | 3.04      | -          | -               | -          | -      |
| 11_10685 | 2H  | 72.99  | 4.37      | AK362284   | -               | 3          | yes    |
| 11_10687 | 7H  | 139.9  | 3.32      | AK366838   | -               | 3          | yes    |
| 11_10939 | 6H  | 37.29  | 3.46      | AK371919   | -               | non-coding | yes    |
| 11_11012 | 7H  | 149.31 | 2.93      | AK360584   | -               | 1          | no     |
| 11_11111 | 6H  | 139.09 | 2.80      | AK366470   | -               | non-coding | yes    |
| 11_11243 | 7H  | 121.36 | 2.79      | -          | -               | -          | -      |
| 11_11354 | 2H  | 68.07  | 2.76      | AK371682   | -               | non-coding | yes    |
| 11_11432 | 5H  | 38.78  | 3.59      | -          | -               | -          | -      |
| 11_20018 | 5H  | 93.66  | 3.32      | AK376008   | -               | non-coding | yes    |
| 11_20029 | 6H  | 133.25 | 3.16      | AK354118   | -               | 1          | no     |
| 11_20086 | 2H  | 110.93 | 2.96      | AK358640   | -               | non-coding | yes    |
| 11_20109 | 4H  | 29.34  | 2.97      | AK360657   | -               | 3          | yes    |
| 11_20133 | 1H  | 132.16 | 2.74      | AK361091   | -               | non-coding | yes    |
| 11_20145 | 4H  | 1.2    | 2.76      | -          | -               | -          | -      |
| 11_20260 | 1H  | 42.42  | 2.73      | AK355367   | -               | 3          | yes    |
| 11_20390 | 2H  | 72.99  | 3.47      | FN179383   | SBE2a           | 3          | yes    |
| 11_20485 | 7H  | 91.67  | 2.97      | -          | -               | -          | -      |
| 11_20620 | 6H  | 78.52  | 2.78      | AK366751   | -               | non-coding | yes    |
| 11_21005 | 2H  | 54.92  | 2.76      | -          | -               | -          | -      |

|          |    |        |      |              |              |            |     |
|----------|----|--------|------|--------------|--------------|------------|-----|
| 11_21121 | 5H | 58.65  | 2.93 | AK356836     | -            | 3          | yes |
| 11_21192 | 1H | 89.77  | 4.03 | AK357712     | -            | non-coding | yes |
| 11_21244 | 5H | 51.51  | 4.22 | AK359027     | -            | 3          | yes |
| 11_21325 | 5H | 123.12 | 3.06 | AK362100     | -            | non-coding | yes |
| 11_21340 | 2H | 116.5  | 2.85 | -            | -            | -          | -   |
| 11_21399 | 2H | 72.99  | 4.94 | AK357878     | -            | 1          | no  |
| 11_21406 | 2H | 142.67 | 3.26 | AK370573     | -            | 2          | no  |
| 11_21447 | 5H | 41.45  | 3.46 | AK364513     | -            | 2          | no  |
| 11_21452 | 5H | 155.23 | 2.88 | AK372156     | -            | 1          | no  |
| 11_21502 | 3H | 76.43  | 3.01 | AK356987     | -            | 3          | yes |
| 12_10014 | 3H | 173.43 | 3.22 | -            | -            | -          | -   |
| 12_10089 | 7H | 91.12  | 2.76 | -            | -            | -          | -   |
| 12_10154 | 2H | 69.05  | 4.02 | AK355324     | -            | non-coding | yes |
| 12_10170 | 4H | 88.7   | 4.17 | AK373474     | -            | non-coding | yes |
| 12_10199 | 6H | 49.67  | 3.54 | AK376992     | -            | non-coding | yes |
| 12_10203 | 5H | 59.72  | 3.93 | AK356265     | -            | 3          | yes |
| 12_10219 | 0  | 0      | 2.91 | AY039003     | Xantha-f     | 3          | yes |
| 12_10264 | 5H | 47.04  | 3.42 | WHITE1A      | E1           | non-coding | yes |
| 12_10284 | 0  | 0      | 3.50 | XM_003564030 | LOC100843138 | 3          | yes |
| 12_10347 | 4H | 43.72  | 2.81 | AK362515     | -            | non-coding | yes |
| 12_10392 | 6H | 72.17  | 3.20 | AK361836     | -            | 3          | yes |
| 12_10581 | 7H | 82.41  | 3.14 | AK375754     | -            | 3          | yes |
| 12_10725 | 5H | 52.86  | 2.95 | AK366248     | -            | non-coding | yes |
| 12_10810 | 4H | 37.88  | 3.93 | AK366265     | -            | non-coding | yes |
| 12_10824 | 4H | 102.93 | 3.58 | XM_003577507 | LOC100843401 | non-coding | yes |
| 12_11151 | 5H | 51.51  | 4.30 | AK354730     | -            | 3          | yes |
| 12_11271 | 1H | 136.7  | 2.77 | -            | -            | -          | -   |
| 12_11288 | 2H | 67.08  | 3.93 | AK366035     | -            | 3          | no  |
| 12_11310 | 3H | 13.13  | 3.29 | AK372013     | -            | 3          | yes |
| 12_11316 | 2H | 73.89  | 3.35 | AK354712     | -            | non-coding | yes |
| 12_11324 | 2H | 72.99  | 5.54 | AK356277     | -            | non-coding | yes |
| 12_11408 | 0  | 0      | 2.73 | -            | -            | -          | -   |
| 12_11444 | 1H | 54.54  | 2.76 | AJ965495     | mcb1         | non-coding | yes |
| 12_11498 | 1H | 34.45  | 3.24 | -            | -            | -          | -   |
| 12_20278 | 5H | 59.72  | 3.93 | AK356265     | -            | 1          | no  |
| 12_20413 | 3H | 135.43 | 2.80 | AK356460     | -            | 3          | yes |
| 12_20649 | 0  | 0      | 2.80 | -            | -            | -          | -   |
| 12_20685 | 7H | 94.34  | 3.24 | -            | -            | -          | -   |
| 12_20981 | 5H | 51.51  | 4.22 | AK370568     | -            | 3          | yes |

|          |    |        |      |              |              |            |     |
|----------|----|--------|------|--------------|--------------|------------|-----|
| 12_21003 | 0  | 0      | 3.57 | -            | -            | -          | -   |
| 12_21117 | 4H | 0      | 4.62 | AK359776     | -            | non-coding | yes |
| 12_21131 | 1H | 59.99  | 2.90 | AK362065     | -            | 3          | yes |
| 12_21234 | 7H | 68.89  | 3.77 | AK356095     | -            | 2          | no  |
| 12_21319 | 7H | 82.41  | 2.92 | XM_003573274 | LOC100845308 | non-coding | yes |
| 12_30046 | 4H | 105.83 | 2.94 | -            | -            | -          | -   |
| 12_30068 | 2H | 67.08  | 3.93 | AK364966     | -            | 3          | yes |
| 12_30226 | 4H | 89.36  | 2.89 | -            | -            | -          | -   |
| 12_30250 | 3H | 106.67 | 3.75 | AK356601     | -            | non-coding | yes |
| 12_30344 | 7H | 77.02  | 2.91 | AK359310     | -            | non-coding | yes |
| 12_30404 | 1H | 42.42  | 2.79 | AK355367     | -            | 3          | yes |
| 12_30524 | 5H | 116.66 | 3.39 | AK366243     | -            | non-coding | yes |
| 12_30577 | 5H | 177.9  | 2.73 | -            | -            | -          | -   |
| 12_30581 | 7H | 79.08  | 2.89 | AK356791     | -            | 3          | yes |
| 12_30637 | 6H | 72.17  | 4.10 | AK368823     | -            | non-coding | yes |
| 12_30640 | 3H | 108.7  | 2.78 | AK369817     | -            | non-coding | yes |
| 12_30644 | 5H | 50.53  | 2.83 | AK374038     | -            | 3          | yes |
| 12_30724 | 2H | 72.99  | 2.83 | AK368064     | -            | 3          | yes |
| 12_30737 | 3H | 59.83  | 3.50 | AK361759     | -            | 3          | yes |
| 12_30745 | 5H | 55.44  | 3.06 | AK366468     | -            | 3          | yes |
| 12_30834 | 5H | 88.05  | 3.20 | AK372467     | -            | non-coding | yes |
| 12_30850 | 5H | 98.2   | 3.28 | DQ480160     | CBF4B        | non-coding | yes |
| 12_30956 | 6H | 142.2  | 3.20 | -            | -            | -          | -   |
| 12_30988 | 4H | 111.81 | 3.36 | Y14573       | Mlo          | non-coding | yes |
| 12_31017 | 3H | 67.86  | 3.28 | AK356796     | -            | non-coding | yes |
| 12_31021 | 2H | 82.44  | 2.85 | AF112963     | Cht2         | non-coding | yes |
| 12_31023 | 5H | 4.15   | 2.80 | AK355143     | -            | non-coding | yes |
| 12_31032 | 5H | 52.86  | 3.81 | AF326715     | adh3         | non-coding | yes |
| 12_31035 | 5H | 52.86  | 3.80 | DQ195967     | adh3         | non-coding | yes |
| 12_31043 | 6H | 112.39 | 2.77 | AY349220     | Dhn5         | 3          | yes |
| 12_31062 | 5H | 51.51  | 3.86 | AK365941     | -            | 3          | yes |
| 12_31064 | 5H | 51.51  | 4.23 | AK365941     | -            | 3          | yes |
| 12_31081 | 1H | 143.2  | 3.60 | AK356376     | -            | 3          | yes |
| 12_31100 | 2H | 142.67 | 3.26 | AK370573     | -            | 2          | no  |
| 12_31179 | 1H | 61.39  | 2.79 | AY738115     | cbp1         | 3          | yes |
| 12_31189 | 2H | 67.08  | 2.76 | AK364573     | -            | 3          | yes |
| 12_31202 | 0  | 0      | 2.73 | AK358464     | -            | non-coding | yes |
| 12_31246 | 4H | 92.41  | 3.24 | AK362249     | -            | non-coding | yes |
| 12_31411 | 0  | 0      | 2.81 | AK372597     | -            | 2          | no  |

|          |    |        |      |          |   |            |     |
|----------|----|--------|------|----------|---|------------|-----|
| 12_31486 | 4H | 6.86   | 3.75 | -        | - | -          | -   |
| 12_31511 | 0  | 0      | 3.01 | AK360621 | - | non-coding | yes |
| 12_31525 | 3H | 134.05 | 3.32 | AK364139 | - | 2          | no  |

---
